# Supplementary material for: Genomic Insights into the Population Structure and Adaptive Variation of Mullus barbatus in the Mediterranean Sea
Source: Research Square preprint supplement (doi:10.21203/rs.3.rs-6370797/v1), 2025-05-21
Supplement: Supplementary file 1 [file 608f88de1bae065138102180.xlsx]

## Sheet: MED_UNITs Seq Sample Metadata
CODE	species	tissue type (fresh/frozen)	sampling date	GSA	latitude (decimal)	longitude (decimal)	depth (m)	bottom temperature if available (°C)	total length (mm)	total ind. weight (g)	sex (M, F)	maturity stage (MEDITS scales*)	Sequencing Library	Barcode 1	Barcode 2
01b_01	Mullus barbatus	fresh	2019-07-03	1	36.7763	-2.55623	60	NOT AVAILABLE	330	505	F	4b	Library2	TCAGA	TAGCA
01b_02	Mullus barbatus	fresh	2019-07-03	1	36.7763	-2.55623	60	NOT AVAILABLE	300	330	F	4b	Library2	TGCAACA	AGCTGTC
01b_03	Mullus barbatus	fresh	2019-07-03	1	36.7763	-2.55623	60	NOT AVAILABLE	325	398	F	4b	Library2	GATCG	AGTCA
01b_04	Mullus barbatus	fresh	2019-07-06	1	36.7642	-2.56788	60	NOT AVAILABLE	158	43	M	2b	Library2	CGTATCA	TACGTGT
01b_05	Mullus barbatus	fresh	2019-07-06	1	36.7642	-2.56788	60	NOT AVAILABLE	163	44	M	2b	Library2	CATGA	GCATA
01b_06	Mullus barbatus	fresh	2019-07-06	1	36.7642	-2.56788	60	NOT AVAILABLE	165	46	F	2c	Library2	CACAGAC	GAGATGT
01b_07	Mullus barbatus	fresh	2019-07-06	1	36.7642	-2.56788	60	NOT AVAILABLE	160	41	M	4b	Library2	ATCGA	CGATC
01b_08	Mullus barbatus	fresh	2019-07-06	1	36.7642	-2.56788	60	NOT AVAILABLE	150	43	m	2b	Library2	ACTGCAC	CATCTGT
01b_09	Mullus barbatus	fresh	2019-09-17	1	36.7488	-2.58298	50	NOT AVAILABLE	140	28	M	2a	Library2	TCGAG	CTGGT
01b_10	Mullus barbatus	fresh	2019-09-17	1	36.7488	-2.58298	50	NOT AVAILABLE	145	31	F	4a	Library2	TCTCTCA	GTCAAGT
01b_11	Mullus barbatus	fresh	2019-09-17	1	36.7488	-2.58298	50	NOT AVAILABLE	175	56	M	4a	Library2	GTCAC	GAAGC
01b_12	Mullus barbatus	fresh	2019-09-17	1	36.7488	-2.58298	50	NOT AVAILABLE	160	44	M	4b	Library2	GTACACA	ATACGGT
01b_13	Mullus barbatus	fresh	2019-09-17	1	36.7488	-2.58298	50	NOT AVAILABLE	145	37	F	4a	Library2	GCATT	TAGCA
01b_14	Mullus barbatus	fresh	2019-09-17	1	36.7488	-2.58298	50	NOT AVAILABLE	165	45	F	4a	Library2	CTCTTCA	AGCTGTC
01b_15	Mullus barbatus	fresh	2019-09-17	1	36.7488	-2.58298	50	NOT AVAILABLE	140	29	F	4a	Library2	CGATA	AGTCA
01b_16	Mullus barbatus	fresh	2019-09-17	1	36.7488	-2.58298	50	NOT AVAILABLE	149	36	M	3	Library2	CTAGGAC	TACGTGT
01b_17	Mullus barbatus	fresh	2019-09-17	1	36.7488	-2.58298	50	NOT AVAILABLE	162	47	M	3	Library2	ACGTA	GCATA
01b_18	Mullus barbatus	fresh	2019-09-17	1	36.7488	-2.58298	50	NOT AVAILABLE	170	48	M	3	Library2	CAGTCAC	GAGATGT
01b_19	Mullus barbatus	fresh	2019-09-17	1	36.7488	-2.58298	50	NOT AVAILABLE	161	46	M	4a	Library2	AGAGT	CGATC
01b_20	Mullus barbatus	fresh	2019-09-17	1	36.7488	-2.58298	50	NOT AVAILABLE	158	46	M	3	Library2	GCTAACA	CATCTGT
01b_21	Mullus barbatus	fresh	2019-09-17	1	36.7488	-2.58298	50	NOT AVAILABLE	155	50	F	2b	Library2	ATGCT	CTGGT
01b_22	Mullus barbatus	fresh	2019-09-17	1	36.7488	-2.58298	50	NOT AVAILABLE	167	50	M	4a	Library2	ACACGAG	GTCAAGT
01b_23	Mullus barbatus	fresh	2019-09-17	1	36.7488	-2.58298	50	NOT AVAILABLE	160	42	M	3	Library2	GACTA	GAAGC
01b_24	Mullus barbatus	fresh	2019-09-17	1	36.7488	-2.58298	50	NOT AVAILABLE	157	45	F	4a	Library2	AGGACAC	ATACGGT
01b_25	Mullus barbatus	fresh	2019-09-17	1	36.7488	-2.58298	50	NOT AVAILABLE	169	51	M	4b	Library2	TCAGA	AGCTGTC
01b_26	Mullus barbatus	fresh	2019-09-17	1	36.7488	-2.58298	50	NOT AVAILABLE	174	53	F	4a	Library2	TGCAACA	AGTCA
01b_27	Mullus barbatus	fresh	2019-09-17	1	36.7488	-2.58298	50	NOT AVAILABLE	150	38	F	4a	Library2	GATCG	TACGTGT
01b_28	Mullus barbatus	fresh	2019-09-17	1	36.7488	-2.58298	50	NOT AVAILABLE	165	43	F	2c	Library2	CGTATCA	GCATA
01b_29	Mullus barbatus	fresh	2019-09-17	1	36.7488	-2.58298	50	NOT AVAILABLE	166	55	M	4b	Library2	CATGA	GAGATGT
01b_30	Mullus barbatus	fresh	2019-09-17	1	36.7488	-2.58298	50	NOT AVAILABLE	162	46	M	4a	Library2	CACAGAC	CGATC
01b_31	Mullus barbatus	fresh	2019-09-17	1	36.7488	-2.58298	50	NOT AVAILABLE	145	40	F	4a	Library2	ATCGA	CATCTGT
01b_32	Mullus barbatus	fresh	2019-09-17	1	36.7488	-2.58298	50	NOT AVAILABLE	145	31	F	2c	Library2	ACTGCAC	CTGGT
01b_33	Mullus barbatus	fresh	2019-09-20	1	36.7353	-2.572	80	NOT AVAILABLE	175	63	M	4b	Library2	TCGAG	GTCAAGT
01b_34	Mullus barbatus	fresh	2019-09-20	1	36.7353	-2.572	80	NOT AVAILABLE	181	74	M	4b	Library2	TCTCTCA	GAAGC
01b_35	Mullus barbatus	fresh	2019-09-20	1	36.7353	-2.572	80	NOT AVAILABLE	173	63	M	4b	Library2	GTCAC	ATACGGT
01b_36	Mullus barbatus	fresh	2019-09-20	1	36.7353	-2.572	80	NOT AVAILABLE	177	71	F	4a	Library2	GTACACA	TAGCA
01b_37	Mullus barbatus	fresh	2019-09-20	1	36.7353	-2.572	80	NOT AVAILABLE	204	94	F	4a	Library2	GCATT	AGCTGTC
01b_38	Mullus barbatus	fresh	2019-09-20	1	36.7353	-2.572	80	NOT AVAILABLE	179	68	M	4b	Library2	CTCTTCA	AGTCA
01b_39	Mullus barbatus	fresh	2019-09-20	1	36.7353	-2.572	80	NOT AVAILABLE	154	46	F	4a	Library2	CGATA	TACGTGT
01b_40	Mullus barbatus	fresh	2019-09-20	1	36.7353	-2.572	80	NOT AVAILABLE	150	41	F	4a	Library2	CTAGGAC	GCATA
01b_41	Mullus barbatus	fresh	2019-09-20	1	36.7353	-2.572	80	NOT AVAILABLE	169	56	M	4b	Library2	ACGTA	GAGATGT
01b_42	Mullus barbatus	fresh	2019-09-20	1	36.7353	-2.572	80	NOT AVAILABLE	177	68	F	4b	Library2	CAGTCAC	CGATC
01b_43	Mullus barbatus	fresh	2019-09-20	1	36.7353	-2.572	80	NOT AVAILABLE	170	58	M	4b	Library2	AGAGT	CATCTGT
01b_44	Mullus barbatus	fresh	2019-09-20	1	36.7353	-2.572	80	NOT AVAILABLE	202	92	F	4a	Library2	GCTAACA	CTGGT
01b_45	Mullus barbatus	fresh	2019-09-20	1	36.7353	-2.572	80	NOT AVAILABLE	180	68	F	4b	Library2	ATGCT	GTCAAGT
01b_46	Mullus barbatus	fresh	2019-09-20	1	36.7353	-2.572	80	NOT AVAILABLE	205	104	F	4a	Library2	ACACGAG	GAAGC
01b_47	Mullus barbatus	fresh	2019-09-20	1	36.7353	-2.572	80	NOT AVAILABLE	150	42	M	4b	Library2	GACTA	ATACGGT
01b_48	Mullus barbatus	fresh	2019-09-20	1	36.7353	-2.572	80	NOT AVAILABLE	162	54	F	4b	Library2	AGGACAC	TAGCA
04b_01	Mullus barbatus	frozen	2019-10-01	4	36.6457	2.63526	NOT AVAILABLE	NOT AVAILABLE	155	39.78	F	6	Library4	CTAGGAC	AGTCA
04b_03	Mullus barbatus	frozen	2019-10-01	4	36.6457	2.63526	NOT AVAILABLE	NOT AVAILABLE	167	51.74	F	6	Library4	ACGTA	TACGTGT
04b_05	Mullus barbatus	frozen	2019-10-01	4	36.6457	2.63526	NOT AVAILABLE	NOT AVAILABLE	140	31.64	M	3	Library4	CAGTCAC	GCATA
04b_07	Mullus barbatus	frozen	2019-10-01	4	36.6457	2.63526	NOT AVAILABLE	NOT AVAILABLE	156	53.41	F	5	Library4	AGAGT	GAGATGT
04b_11	Mullus barbatus	frozen	2019-10-01	4	36.6457	2.63526	NOT AVAILABLE	NOT AVAILABLE	151	41.37	F	5	Library4	GCTAACA	CGATC
04b_15	Mullus barbatus	frozen	2019-10-01	4	36.6457	2.63526	NOT AVAILABLE	NOT AVAILABLE	163	45.94	F	6	Library4	ATGCT	CATCTGT
04b_16	Mullus barbatus	frozen	2019-10-01	4	36.6457	2.63526	NOT AVAILABLE	NOT AVAILABLE	153	42.7	M	6	Library4	ACACGAG	CTGGT
04b_20	Mullus barbatus	frozen	2019-10-01	4	36.6457	2.63526	NOT AVAILABLE	NOT AVAILABLE	146	33.26	M	5	Library4	GACTA	GTCAAGT
04b_23	Mullus barbatus	frozen	2019-10-01	4	36.6457	2.63526	NOT AVAILABLE	NOT AVAILABLE	163	40.16	F	NOT AVAILABLE	Library4	AGGACAC	GAAGC
04b_47	Mullus barbatus	frozen	2019-10-01	4	36.6457	2.63526	NOT AVAILABLE	NOT AVAILABLE	161	45.88	M	5	Library4	ATGCT	ATACGGT
04b_48	Mullus barbatus	frozen	2019-10-01	4	36.6457	2.63526	NOT AVAILABLE	NOT AVAILABLE	143	30.87	M	5	Library4	ACACGAG	TAGCA
04b_49	Mullus barbatus	frozen	2019-10-01	4	36.6457	2.63526	NOT AVAILABLE	NOT AVAILABLE	128	28.36	F	6	Library4	GACTA	AGCTGTC
04b_50	Mullus barbatus	frozen	2019-10-01	4	36.6457	2.63526	NOT AVAILABLE	NOT AVAILABLE	146	35.59	F	6	Library4	AGGACAC	AGTCA
05abc_01	Mullus barbatus	fresh	2019-10-17	5	38.9324	1.62048	NOT AVAILABLE	NOT AVAILABLE	198	81.13	F	2b	Library4	ACGTA	AGCTGTC
05abc_02	Mullus barbatus	fresh	2019-10-17	5	38.9324	1.62048	NOT AVAILABLE	NOT AVAILABLE	170	56.74	F	2b	Library4	CAGTCAC	AGTCA
05abc_04	Mullus barbatus	fresh	2019-10-17	5	38.9324	1.62048	NOT AVAILABLE	NOT AVAILABLE	187	67.98	F	2b	Library4	AGAGT	TACGTGT
05abc_05	Mullus barbatus	fresh	2019-10-17	5	38.9324	1.62048	NOT AVAILABLE	NOT AVAILABLE	184	66.06	F	2b	Library4	GCTAACA	GCATA
05abc_06	Mullus barbatus	fresh	2019-10-17	5	38.9324	1.62048	NOT AVAILABLE	NOT AVAILABLE	171	56.76	F	2b	Library4	ATGCT	GAGATGT
05abc_07	Mullus barbatus	fresh	2019-10-17	5	38.9324	1.62048	NOT AVAILABLE	NOT AVAILABLE	172	48.84	F	2b	Library4	ACACGAG	CGATC
05abc_08	Mullus barbatus	fresh	2019-10-17	5	38.9324	1.62048	NOT AVAILABLE	NOT AVAILABLE	174	60.4	F	2b	Library4	GACTA	CATCTGT
05abc_09	Mullus barbatus	fresh	2019-10-17	5	38.9324	1.62048	NOT AVAILABLE	NOT AVAILABLE	186	64.97	F	2b	Library4	AGGACAC	CTGGT
05abc_10	Mullus barbatus	fresh	2019-10-17	5	38.9324	1.62048	NOT AVAILABLE	NOT AVAILABLE	195	79.37	F	2b	Library4	TCAGA	GAAGC
05abc_11	Mullus barbatus	fresh	2019-10-17	5	38.9324	1.62048	NOT AVAILABLE	NOT AVAILABLE	170	51.14	F	2b	Library4	TGCAACA	ATACGGT
05abc_12	Mullus barbatus	fresh	2019-10-17	5	38.9324	1.62048	NOT AVAILABLE	NOT AVAILABLE	177	52.74	F	2b	Library4	GATCG	TAGCA
05abc_13	Mullus barbatus	fresh	2019-10-17	5	38.9324	1.62048	NOT AVAILABLE	NOT AVAILABLE	175	58.2	F	2b	Library4	CGTATCA	AGCTGTC
05abc_14	Mullus barbatus	fresh	2019-10-17	5	38.9324	1.62048	NOT AVAILABLE	NOT AVAILABLE	184	65.28	F	4b	Library4	CATGA	AGTCA
05abc_15	Mullus barbatus	fresh	2019-10-17	5	38.9324	1.62048	NOT AVAILABLE	NOT AVAILABLE	190	71.49	F	4b	Library4	CACAGAC	TACGTGT
05abc_16	Mullus barbatus	fresh	2019-10-17	5	38.9324	1.62048	NOT AVAILABLE	NOT AVAILABLE	195	81.24	F	4b	Library4	ATCGA	GCATA
05abc_17	Mullus barbatus	fresh	2019-10-17	5	38.9324	1.62048	NOT AVAILABLE	NOT AVAILABLE	178	60.55	F	4b	Library4	ACTGCAC	GAGATGT
05abc_18	Mullus barbatus	fresh	2019-10-17	5	38.9324	1.62048	NOT AVAILABLE	NOT AVAILABLE	216	93.37	F	4b	Library4	TCGAG	CGATC
05abc_19	Mullus barbatus	fresh	2019-10-17	5	38.9324	1.62048	NOT AVAILABLE	NOT AVAILABLE	204	94.74	F	4b	Library4	TCTCTCA	CATCTGT
05abc_20	Mullus barbatus	fresh	2019-10-17	5	38.9324	1.62048	NOT AVAILABLE	NOT AVAILABLE	175	55.81	F	4b	Library4	GTCAC	CTGGT
05abc_21	Mullus barbatus	fresh	2019-10-17	5	38.9324	1.62048	NOT AVAILABLE	NOT AVAILABLE	180	63.7	F	4b	Library4	GTACACA	GTCAAGT
05abc_23	Mullus barbatus	fresh	2019-10-17	5	38.9324	1.62048	NOT AVAILABLE	NOT AVAILABLE	173	55.18	F	2b	Library4	GCATT	GAAGC
05abc_24	Mullus barbatus	fresh	2019-10-17	5	38.9324	1.62048	NOT AVAILABLE	NOT AVAILABLE	164	44.58	F	2b	Library4	CTCTTCA	ATACGGT
05abc_25	Mullus barbatus	fresh	2019-10-17	5	38.9324	1.62048	NOT AVAILABLE	NOT AVAILABLE	172	53.86	F	2b	Library4	CGATA	TAGCA
05abc_26	Mullus barbatus	fresh	2019-10-17	5	38.9324	1.62048	NOT AVAILABLE	NOT AVAILABLE	182	65.29	F	2b	Library4	CTAGGAC	AGCTGTC
05abc_27	Mullus barbatus	fresh	2019-10-17	5	38.9324	1.62048	NOT AVAILABLE	NOT AVAILABLE	160	46.42	F	2b	Library4	ACGTA	AGTCA
05abc_29	Mullus barbatus	fresh	2019-10-17	5	38.9324	1.62048	NOT AVAILABLE	NOT AVAILABLE	189	78.53	F	2b	Library4	CAGTCAC	TACGTGT
05abc_30	Mullus barbatus	fresh	2019-10-17	5	38.9324	1.62048	NOT AVAILABLE	NOT AVAILABLE	185	65.15	F	2b	Library4	AGAGT	GCATA
05abc_31	Mullus barbatus	fresh	2019-10-17	5	38.9324	1.62048	NOT AVAILABLE	NOT AVAILABLE	184	58.39	F	2b	Library4	GCTAACA	GAGATGT
05abc_32	Mullus barbatus	fresh	2019-10-17	5	38.9324	1.62048	NOT AVAILABLE	NOT AVAILABLE	178	57.8	F	2b	Library4	ATGCT	CGATC
05abc_33	Mullus barbatus	fresh	2019-10-17	5	38.9324	1.62048	NOT AVAILABLE	NOT AVAILABLE	180	63.07	F	2b	Library4	ACACGAG	CATCTGT
05abc_34	Mullus barbatus	fresh	2019-10-17	5	38.9324	1.62048	NOT AVAILABLE	NOT AVAILABLE	176	60.33	F	4b	Library4	GACTA	CTGGT
05abc_35	Mullus barbatus	fresh	2019-10-17	5	38.9324	1.62048	NOT AVAILABLE	NOT AVAILABLE	181	63.69	F	4b	Library4	AGGACAC	GTCAAGT
05abc_36	Mullus barbatus	fresh	2019-10-17	5	38.9324	1.62048	NOT AVAILABLE	NOT AVAILABLE	156	39.36	M	2c	Library4	TCAGA	ATACGGT
05abc_37	Mullus barbatus	fresh	2019-10-17	5	38.9324	1.62048	NOT AVAILABLE	NOT AVAILABLE	171	53.51	M	2c	Library4	TGCAACA	TAGCA
05abc_38	Mullus barbatus	fresh	2019-10-17	5	38.9324	1.62048	NOT AVAILABLE	NOT AVAILABLE	165	48.99	M	2c	Library4	GATCG	AGCTGTC
05abc_39	Mullus barbatus	fresh	2019-10-17	5	38.9324	1.62048	NOT AVAILABLE	NOT AVAILABLE	182	63.14	M	2c	Library4	CGTATCA	AGTCA
05abc_40	Mullus barbatus	fresh	2019-10-17	5	38.9324	1.62048	NOT AVAILABLE	NOT AVAILABLE	160	46.93	M	2c	Library4	CATGA	TACGTGT
05abc_41	Mullus barbatus	fresh	2019-10-17	5	38.9324	1.62048	NOT AVAILABLE	NOT AVAILABLE	163	47.75	M	2c	Library4	CACAGAC	GCATA
05abc_42	Mullus barbatus	fresh	2019-10-17	5	38.9324	1.62048	NOT AVAILABLE	NOT AVAILABLE	168	53	M	2c	Library4	ATCGA	GAGATGT
05abc_43	Mullus barbatus	fresh	2019-10-17	5	38.9324	1.62048	NOT AVAILABLE	NOT AVAILABLE	166	50.9	M	3	Library4	ACTGCAC	CGATC
05abc_44	Mullus barbatus	fresh	2019-10-17	5	38.9324	1.62048	NOT AVAILABLE	NOT AVAILABLE	166	46.39	M	3	Library4	TCGAG	CATCTGT
05abc_45	Mullus barbatus	fresh	2019-10-17	5	38.9324	1.62048	NOT AVAILABLE	NOT AVAILABLE	180	57.57	M	3	Library4	TCTCTCA	CTGGT
05abc_46	Mullus barbatus	fresh	2019-10-17	5	38.9324	1.62048	NOT AVAILABLE	NOT AVAILABLE	167	47.78	M	3	Library4	GTCAC	GTCAAGT
05abc_47	Mullus barbatus	fresh	2019-10-17	5	38.9324	1.62048	NOT AVAILABLE	NOT AVAILABLE	172	49.49	M	4a	Library4	GTACACA	GAAGC
05abc_48	Mullus barbatus	fresh	2019-10-17	5	38.9324	1.62048	NOT AVAILABLE	NOT AVAILABLE	168	53.15	M	4a	Library4	GCATT	ATACGGT
05abc_49	Mullus barbatus	fresh	2019-10-17	5	38.9324	1.62048	NOT AVAILABLE	NOT AVAILABLE	162	46.83	M	4a	Library4	CTCTTCA	TAGCA
05abc_50	Mullus barbatus	fresh	2019-10-17	5	38.9324	1.62048	NOT AVAILABLE	NOT AVAILABLE	166	49.56	M	4a	Library4	CGATA	AGCTGTC
06a_01	Mullus barbatus	fresh	2019-06-27	6	38.161	-0.362383	70	NOT AVAILABLE	180	56	M	2a	Library2	TCAGA	CTGGT
06a_02	Mullus barbatus	fresh	2019-06-27	6	38.161	-0.362383	70	NOT AVAILABLE	180	65	M	2c	Library2	TGCAACA	GTCAAGT
06a_03	Mullus barbatus	fresh	2019-06-27	6	38.161	-0.362383	70	NOT AVAILABLE	182	64	F	2a	Library2	GATCG	GAAGC
06a_04	Mullus barbatus	fresh	2019-06-27	6	38.161	-0.362383	70	NOT AVAILABLE	162	43	M	2b	Library2	CGTATCA	ATACGGT
06a_05	Mullus barbatus	fresh	2019-06-27	6	38.161	-0.362383	70	NOT AVAILABLE	158	44	F	2a	Library2	CATGA	TAGCA
06a_06	Mullus barbatus	fresh	2019-06-27	6	38.161	-0.362383	70	NOT AVAILABLE	176	66	F	2c	Library2	CACAGAC	AGCTGTC
06a_07	Mullus barbatus	fresh	2019-06-27	6	38.161	-0.362383	70	NOT AVAILABLE	172	48	F	2a	Library2	ATCGA	AGTCA
06a_08	Mullus barbatus	fresh	2019-06-27	6	38.161	-0.362383	70	NOT AVAILABLE	190	75	F	3	Library2	ACTGCAC	TACGTGT
06a_09	Mullus barbatus	fresh	2019-06-27	6	38.161	-0.362383	70	NOT AVAILABLE	168	53	M	3	Library2	TCGAG	GCATA
06a_10	Mullus barbatus	fresh	2019-06-27	6	38.161	-0.362383	70	NOT AVAILABLE	181	67	F	3	Library2	TCTCTCA	GAGATGT
06a_11	Mullus barbatus	fresh	2019-06-27	6	38.161	-0.362383	70	NOT AVAILABLE	160	48	M	2b	Library2	GTCAC	CGATC
06a_12	Mullus barbatus	fresh	2019-06-27	6	38.161	-0.362383	70	NOT AVAILABLE	173	53	F	3	Library2	GTACACA	CATCTGT
06a_13	Mullus barbatus	fresh	2019-06-27	6	38.161	-0.362383	70	NOT AVAILABLE	188	72	M	2b	Library2	GCATT	CTGGT
06a_14	Mullus barbatus	fresh	2019-06-27	6	38.161	-0.362383	70	NOT AVAILABLE	167	49	M	2b	Library2	CTCTTCA	GTCAAGT
06a_15	Mullus barbatus	fresh	2019-06-27	6	38.161	-0.362383	70	NOT AVAILABLE	165	50	M	2b	Library2	CGATA	GAAGC
06a_16	Mullus barbatus	fresh	2019-06-27	6	38.161	-0.362383	70	NOT AVAILABLE	180	66	F	2c	Library2	CTAGGAC	ATACGGT
06a_17	Mullus barbatus	fresh	2019-06-27	6	38.161	-0.362383	70	NOT AVAILABLE	160	41	M	4	Library2	ACGTA	TAGCA
06a_18	Mullus barbatus	fresh	2019-06-27	6	38.161	-0.362383	70	NOT AVAILABLE	177	55	M	4	Library2	CAGTCAC	AGCTGTC
06a_19	Mullus barbatus	fresh	2019-06-27	6	38.161	-0.362383	70	NOT AVAILABLE	177	62	M	2b	Library2	AGAGT	AGTCA
06a_20	Mullus barbatus	fresh	2019-06-27	6	38.161	-0.362383	70	NOT AVAILABLE	163	48	M	2a	Library2	GCTAACA	TACGTGT
06a_21	Mullus barbatus	fresh	2019-10-03	6	38.2441	-0.3986	50	NOT AVAILABLE	198	97	F	2c	Library2	ATGCT	GCATA
06a_22	Mullus barbatus	fresh	2019-10-03	6	38.2441	-0.3986	50	NOT AVAILABLE	200	109	F	4a	Library2	ACACGAG	GAGATGT
06a_23	Mullus barbatus	fresh	2019-10-03	6	38.2441	-0.3986	50	NOT AVAILABLE	209	111	F	4a	Library2	GACTA	CGATC
06a_24	Mullus barbatus	fresh	2019-10-03	6	38.2441	-0.3986	50	NOT AVAILABLE	182	78	F	2c	Library2	AGGACAC	CATCTGT
06a_26	Mullus barbatus	fresh	2019-10-03	6	38.2441	-0.3986	50	NOT AVAILABLE	193	91	F	3	Library2	TCAGA	GTCAAGT
06a_27	Mullus barbatus	fresh	2019-10-03	6	38.2441	-0.3986	50	NOT AVAILABLE	178	70	F	4b	Library2	TGCAACA	GAAGC
06a_28	Mullus barbatus	fresh	2019-10-03	6	38.2441	-0.3986	50	NOT AVAILABLE	202	101	F	4a	Library2	GATCG	ATACGGT
06a_29	Mullus barbatus	fresh	2019-10-03	6	38.2441	-0.3986	50	NOT AVAILABLE	230	141	F	2c	Library2	CGTATCA	TAGCA
06a_30	Mullus barbatus	fresh	2019-10-03	6	38.2441	-0.3986	50	NOT AVAILABLE	195	84	F	2c	Library2	CATGA	AGCTGTC
06a_31	Mullus barbatus	fresh	2019-10-03	6	38.2441	-0.3986	50	NOT AVAILABLE	185	80	F	4b	Library2	CACAGAC	AGTCA
06a_33	Mullus barbatus	fresh	2019-10-03	6	38.2441	-0.3986	50	NOT AVAILABLE	155	46	F	4b	Library2	ATCGA	TACGTGT
06a_34	Mullus barbatus	fresh	2019-10-03	6	38.2441	-0.3986	50	NOT AVAILABLE	152	40	F	4b	Library2	ACTGCAC	GCATA
06a_35	Mullus barbatus	fresh	2019-10-03	6	38.2441	-0.3986	50	NOT AVAILABLE	210	115	F	2c	Library2	TCGAG	GAGATGT
06a_36	Mullus barbatus	fresh	2019-10-03	6	38.2441	-0.3986	50	NOT AVAILABLE	197	99	F	4a	Library2	TCTCTCA	CGATC
06a_37	Mullus barbatus	fresh	2019-10-03	6	38.2441	-0.3986	50	NOT AVAILABLE	165	55	F	4c	Library2	GTCAC	CATCTGT
06a_38	Mullus barbatus	fresh	2019-10-03	6	38.2441	-0.3986	50	NOT AVAILABLE	204	90	F	4a	Library2	GTACACA	CTGGT
06a_39	Mullus barbatus	fresh	2019-10-03	6	38.2441	-0.3986	50	NOT AVAILABLE	179	71	F	2c	Library2	GCATT	GTCAAGT
06a_40	Mullus barbatus	fresh	2019-10-03	6	38.2441	-0.3986	50	NOT AVAILABLE	202	101	F	2c	Library2	CTCTTCA	GAAGC
06a_41	Mullus barbatus	fresh	2019-10-03	6	38.2441	-0.3986	50	NOT AVAILABLE	197	80	F	4a	Library2	CGATA	ATACGGT
06a_42	Mullus barbatus	fresh	2019-10-03	6	38.2441	-0.3986	50	NOT AVAILABLE	203	105	F	4a	Library2	CTAGGAC	TAGCA
06a_43	Mullus barbatus	fresh	2019-10-03	6	38.2441	-0.3986	50	NOT AVAILABLE	158	46	F	4a	Library2	ACGTA	AGCTGTC
06a_44	Mullus barbatus	fresh	2019-10-03	6	38.2441	-0.3986	50	NOT AVAILABLE	191	89	F	4a	Library2	CAGTCAC	AGTCA
06a_45	Mullus barbatus	fresh	2019-10-03	6	38.2441	-0.3986	50	NOT AVAILABLE	180	68	F	4b	Library2	AGAGT	TACGTGT
06a_46	Mullus barbatus	fresh	2019-10-03	6	38.2441	-0.3986	50	NOT AVAILABLE	171	54	F	4b	Library2	GCTAACA	GCATA
06a_47	Mullus barbatus	fresh	2019-10-03	6	38.2441	-0.3986	50	NOT AVAILABLE	165	53	F	4b	Library2	ATGCT	GAGATGT
06a_48	Mullus barbatus	fresh	2019-10-03	6	38.2441	-0.3986	50	NOT AVAILABLE	196	92	F	4b	Library2	ACACGAG	CGATC
06a_49	Mullus barbatus	fresh	2019-10-03	6	38.2441	-0.3986	50	NOT AVAILABLE	190	83	F	4a	Library2	GACTA	CATCTGT
06a_50	Mullus barbatus	fresh	2019-10-03	6	38.2441	-0.3986	50	NOT AVAILABLE	197	101	F	4a	Library2	AGGACAC	CTGGT
06c_01	Mullus barbatus	frozen	2019-06-12	6	41.57	3.0257	105	NOT AVAILABLE	162	42.1	F	3	Library1	GATCG	TAGCA
06c_02	Mullus barbatus	frozen	2019-06-12	6	41.57	3.0257	105	NOT AVAILABLE	171	54.84	M	2	Library1	CGTATCA	AGCTGTC
06c_03	Mullus barbatus	frozen	2019-06-12	6	41.57	3.0257	105	NOT AVAILABLE	147	33.21	M	3	Library1	CATGA	AGTCA
06c_04	Mullus barbatus	frozen	2019-06-12	6	41.57	3.0257	105	NOT AVAILABLE	165	42.54	M	3	Library1	CACAGAC	TACGTGT
06c_05	Mullus barbatus	frozen	2019-06-12	6	41.57	3.0257	105	NOT AVAILABLE	184	64	F	3	Library1	ATCGA	GCATA
06c_06	Mullus barbatus	frozen	2019-06-12	6	41.57	3.0257	105	NOT AVAILABLE	166	55.4	M	3	Library1	ACTGCAC	GAGATGT
06c_07	Mullus barbatus	frozen	2019-06-12	6	41.57	3.0257	105	NOT AVAILABLE	164	49.21	M	3	Library1	TCGAG	CGATC
06c_08	Mullus barbatus	frozen	2019-06-12	6	41.57	3.0257	105	NOT AVAILABLE	166	47	M	3	Library1	TCTCTCA	CATCTGT
06c_09	Mullus barbatus	frozen	2019-06-12	6	41.57	3.0257	105	NOT AVAILABLE	151	34.13	M	3	Library1	GTCAC	CTGGT
06c_10	Mullus barbatus	frozen	2019-06-12	6	41.57	3.0257	105	NOT AVAILABLE	148	31.8	M	2	Library1	GTACACA	GTCAAGT
06c_11	Mullus barbatus	frozen	2019-06-12	6	41.57	3.0257	105	NOT AVAILABLE	185	66	F	3	Library1	GCATT	GAAGC
06c_12	Mullus barbatus	frozen	2019-06-12	6	41.57	3.0257	105	NOT AVAILABLE	183	68.9	F	3	Library1	CTCTTCA	ATACGGT
06c_13	Mullus barbatus	frozen	2019-06-12	6	41.57	3.0257	105	NOT AVAILABLE	176	60.7	F	3	Library1	CGATA	TAGCA
06c_14	Mullus barbatus	frozen	2019-06-12	6	41.57	3.0257	105	NOT AVAILABLE	168	51	F	3	Library1	CTAGGAC	AGCTGTC
06c_15	Mullus barbatus	frozen	2019-06-12	6	41.57	3.0257	105	NOT AVAILABLE	185	63	M	3	Library1	ACGTA	AGTCA
06c_16	Mullus barbatus	frozen	2019-06-12	6	41.57	3.0257	105	NOT AVAILABLE	172	58	M	3	Library1	CAGTCAC	TACGTGT
06c_17	Mullus barbatus	frozen	2019-06-12	6	41.57	3.0257	105	NOT AVAILABLE	167	44.9	M	3	Library1	AGAGT	GCATA
06c_18	Mullus barbatus	frozen	2019-06-12	6	41.57	3.0257	105	NOT AVAILABLE	166	52.5	M	2	Library1	GCTAACA	GAGATGT
06c_19	Mullus barbatus	frozen	2019-06-12	6	41.57	3.0257	105	NOT AVAILABLE	159	41.6	M	3	Library1	ATGCT	CGATC
06c_20	Mullus barbatus	frozen	2019-06-12	6	41.57	3.0257	105	NOT AVAILABLE	162	43.2	M	3	Library1	ACACGAG	CATCTGT
06c_21	Mullus barbatus	frozen	2019-06-12	6	41.57	3.0257	105	NOT AVAILABLE	152	39.7	M	2	Library1	GACTA	CTGGT
06c_22	Mullus barbatus	frozen	2019-06-12	6	41.57	3.0257	105	NOT AVAILABLE	158	38	M	3	Library1	AGGACAC	GTCAAGT
06c_23	Mullus barbatus	frozen	2019-06-12	6	41.57	3.0257	105	NOT AVAILABLE	166	40.8	M	2	Library1	TCAGA	ATACGGT
06c_24	Mullus barbatus	frozen	2019-06-12	6	41.57	3.0257	105	NOT AVAILABLE	152	31.1	M	3	Library1	TGCAACA	TAGCA
06c_25	Mullus barbatus	frozen	2019-06-12	6	41.57	3.0257	105	NOT AVAILABLE	165	37.5	M	2	Library1	GATCG	AGCTGTC
06c_29	Mullus barbatus	frozen	2019-06-12	6	41.57	3.0257	105	NOT AVAILABLE	176	53.9	F	3	Library1	CGTATCA	AGTCA
06c_30	Mullus barbatus	frozen	2019-06-12	6	41.57	3.0257	105	NOT AVAILABLE	175	58.3	F	3	Library1	CATGA	TACGTGT
06c_31	Mullus barbatus	frozen	2019-06-12	6	41.57	3.0257	105	NOT AVAILABLE	181	50.29	F	3	Library1	CACAGAC	GCATA
06c_32	Mullus barbatus	frozen	2019-06-12	6	41.57	3.0257	105	NOT AVAILABLE	165	62.1	F	3	Library1	ATCGA	GAGATGT
06c_33	Mullus barbatus	frozen	2019-06-12	6	41.57	3.0257	105	NOT AVAILABLE	185	66.4	F	3	Library1	ACTGCAC	CGATC
06c_34	Mullus barbatus	frozen	2019-06-12	6	41.57	3.0257	105	NOT AVAILABLE	165	47.38	F	3	Library1	TCGAG	CATCTGT
06c_35	Mullus barbatus	frozen	2019-06-12	6	41.57	3.0257	105	NOT AVAILABLE	179	55.4	F	3	Library1	TCTCTCA	CTGGT
06c_37	Mullus barbatus	frozen	2019-06-12	6	41.605	2.78753	81	NOT AVAILABLE	215	99.92	F	3	Library1	GTCAC	GTCAAGT
06c_38	Mullus barbatus	frozen	2019-06-12	6	41.605	2.78753	81	NOT AVAILABLE	210	93.51	F	3	Library1	GTACACA	GAAGC
06c_39	Mullus barbatus	frozen	2019-06-12	6	41.605	2.78753	81	NOT AVAILABLE	196	87.16	F	3	Library1	GCATT	ATACGGT
06c_40	Mullus barbatus	frozen	2019-06-12	6	41.605	2.78753	81	NOT AVAILABLE	205	88.76	F	3	Library1	CTCTTCA	TAGCA
06c_41	Mullus barbatus	frozen	2019-06-12	6	41.605	2.78753	81	NOT AVAILABLE	197	77.1	F	3	Library1	CGATA	AGCTGTC
06c_42	Mullus barbatus	frozen	2019-06-12	6	41.605	2.78753	81	NOT AVAILABLE	185	64.94	F	3	Library1	CTAGGAC	AGTCA
06c_43	Mullus barbatus	frozen	2019-06-12	6	41.605	2.78753	81	NOT AVAILABLE	198	77.36	F	3	Library1	ACGTA	TACGTGT
06c_44	Mullus barbatus	frozen	2019-06-12	6	41.605	2.78753	81	NOT AVAILABLE	207	95.08	F	3	Library1	CAGTCAC	GCATA
06c_45	Mullus barbatus	frozen	2019-06-12	6	41.605	2.78753	81	NOT AVAILABLE	208	89.1	F	3	Library1	AGAGT	GAGATGT
06c_46	Mullus barbatus	frozen	2019-06-12	6	41.605	2.78753	81	NOT AVAILABLE	192	69.96	F	3	Library1	GCTAACA	CGATC
06c_47	Mullus barbatus	frozen	2019-06-12	6	41.605	2.78753	81	NOT AVAILABLE	210	93.2	F	3	Library1	ATGCT	CATCTGT
06c_48	Mullus barbatus	frozen	2019-06-12	6	41.605	2.78753	81	NOT AVAILABLE	199	76.16	F	3	Library1	ACACGAG	CTGGT
06c_49	Mullus barbatus	frozen	2019-06-12	6	41.605	2.78753	81	NOT AVAILABLE	201	90.88	F	3	Library1	GACTA	GTCAAGT
06c_50	Mullus barbatus	frozen	2019-06-12	6	41.605	2.78753	81	NOT AVAILABLE	220	100.22	F	3	Library1	AGGACAC	GAAGC
06c_51	Mullus barbatus	fresh	NOT AVAILABLE	6	41.3658	2.78417	550	NOT AVAILABLE	212	117.55	F	4b	Library3	ATCGA	GCATA
06c_52	Mullus barbatus	fresh	NOT AVAILABLE	6	41.3658	2.78417	550	NOT AVAILABLE	235	168.26	F	4b	Library3	ACTGCAC	GAGATGT
06c_53	Mullus barbatus	fresh	NOT AVAILABLE	6	41.3658	2.78417	550	NOT AVAILABLE	200	101.11	F	4b	Library3	TCGAG	CGATC
06c_54	Mullus barbatus	fresh	NOT AVAILABLE	6	41.3658	2.78417	550	NOT AVAILABLE	228	153.02	F	4b	Library3	TCTCTCA	CATCTGT
06c_55	Mullus barbatus	fresh	NOT AVAILABLE	6	41.3658	2.78417	550	NOT AVAILABLE	200	87.44	F	4b	Library3	GTCAC	CTGGT
06c_56	Mullus barbatus	fresh	NOT AVAILABLE	6	41.3658	2.78417	550	NOT AVAILABLE	205	107.27	F	4b	Library3	GTACACA	GTCAAGT
06c_57	Mullus barbatus	fresh	NOT AVAILABLE	6	41.3658	2.78417	550	NOT AVAILABLE	202	108.34	F	4b	Library3	GCATT	GAAGC
06c_58	Mullus barbatus	fresh	NOT AVAILABLE	6	41.3658	2.78417	550	NOT AVAILABLE	199	91.66	F	4b	Library3	CTCTTCA	ATACGGT
06c_59	Mullus barbatus	fresh	NOT AVAILABLE	6	41.3658	2.78417	550	NOT AVAILABLE	190	93.42	F	4b	Library3	CGATA	TAGCA
06c_60	Mullus barbatus	fresh	NOT AVAILABLE	6	41.3658	2.78417	550	NOT AVAILABLE	175	69.3	F	4b	Library3	CTAGGAC	AGCTGTC
06c_61	Mullus barbatus	fresh	NOT AVAILABLE	6	41.3658	2.78417	550	NOT AVAILABLE	195	88.81	F	4b	Library3	ACGTA	AGTCA
06c_62	Mullus barbatus	fresh	NOT AVAILABLE	6	41.3658	2.78417	550	NOT AVAILABLE	194	91.2	F	4b	Library3	CAGTCAC	TACGTGT
06c_63	Mullus barbatus	fresh	NOT AVAILABLE	6	41.3658	2.78417	550	NOT AVAILABLE	210	114.52	F	4b	Library3	AGAGT	GCATA
06c_65	Mullus barbatus	fresh	NOT AVAILABLE	6	41.3658	2.78417	550	NOT AVAILABLE	200	111.57	F	4b	Library3	GCTAACA	GAGATGT
06c_66	Mullus barbatus	fresh	NOT AVAILABLE	6	41.3658	2.78417	550	NOT AVAILABLE	211	110.31	F	4b	Library3	ATGCT	CGATC
06c_68	Mullus barbatus	fresh	NOT AVAILABLE	6	41.3658	2.78417	550	NOT AVAILABLE	188	81.3	F	4b	Library3	ACACGAG	CATCTGT
06c_69	Mullus barbatus	fresh	NOT AVAILABLE	6	41.3658	2.78417	550	NOT AVAILABLE	200	93.71	F	4b	Library3	GACTA	CTGGT
06c_70	Mullus barbatus	fresh	NOT AVAILABLE	6	41.3658	2.78417	550	NOT AVAILABLE	173	74.55	F	4b	Library3	AGGACAC	GTCAAGT
06c_71	Mullus barbatus	fresh	NOT AVAILABLE	6	41.3658	2.78417	550	NOT AVAILABLE	174	67.45	F	4b	Library3	TCAGA	ATACGGT
06c_72	Mullus barbatus	fresh	NOT AVAILABLE	6	41.3658	2.78417	550	NOT AVAILABLE	212	111.21	F	4b	Library3	TGCAACA	TAGCA
06c_73	Mullus barbatus	fresh	NOT AVAILABLE	6	41.3658	2.78417	550	NOT AVAILABLE	170	60.33	M	4a	Library3	GATCG	AGCTGTC
06c_74	Mullus barbatus	fresh	NOT AVAILABLE	6	41.3658	2.78417	550	NOT AVAILABLE	169	62.84	M	4a	Library3	CGTATCA	AGTCA
06c_75	Mullus barbatus	fresh	NOT AVAILABLE	6	41.3658	2.78417	550	NOT AVAILABLE	190	76.51	F	4b	Library3	CATGA	TACGTGT
06c_76	Mullus barbatus	fresh	NOT AVAILABLE	6	41.3658	2.78417	550	NOT AVAILABLE	185	71.35	M	4a	Library3	CACAGAC	GCATA
06c_77	Mullus barbatus	fresh	NOT AVAILABLE	6	41.3658	2.78417	550	NOT AVAILABLE	213	143.21	F	4b	Library3	ATCGA	GAGATGT
06c_78	Mullus barbatus	fresh	NOT AVAILABLE	6	41.3658	2.78417	550	NOT AVAILABLE	169	59.55	M	4a	Library3	ACTGCAC	CGATC
06c_79	Mullus barbatus	fresh	NOT AVAILABLE	6	41.3658	2.78417	550	NOT AVAILABLE	200	92.31	F	4b	Library3	TCGAG	CATCTGT
06c_80	Mullus barbatus	fresh	NOT AVAILABLE	6	41.3658	2.78417	550	NOT AVAILABLE	185	77.11	F	4a	Library3	TCTCTCA	CTGGT
06c_81	Mullus barbatus	fresh	NOT AVAILABLE	6	41.4739	2.81139	398	NOT AVAILABLE	220	114.76	F	3	Library3	GTCAC	GTCAAGT
06c_82	Mullus barbatus	fresh	NOT AVAILABLE	6	41.4739	2.81139	398	NOT AVAILABLE	214	111.58	F	3	Library3	GTACACA	GAAGC
06c_83	Mullus barbatus	fresh	NOT AVAILABLE	6	41.4739	2.81139	398	NOT AVAILABLE	226	117.93	F	3	Library3	GCATT	ATACGGT
06c_84	Mullus barbatus	fresh	NOT AVAILABLE	6	41.4739	2.81139	398	NOT AVAILABLE	221	127.91	F	3	Library3	CTCTTCA	TAGCA
06c_85	Mullus barbatus	fresh	NOT AVAILABLE	6	41.4739	2.81139	398	NOT AVAILABLE	220	103.87	F	3	Library3	CGATA	AGCTGTC
06c_86	Mullus barbatus	fresh	NOT AVAILABLE	6	41.4739	2.81139	398	NOT AVAILABLE	222	112.94	F	3	Library3	CTAGGAC	AGTCA
06c_87	Mullus barbatus	fresh	NOT AVAILABLE	6	41.4739	2.81139	398	NOT AVAILABLE	212	97.98	F	3	Library3	ACGTA	TACGTGT
06c_88	Mullus barbatus	fresh	NOT AVAILABLE	6	41.4739	2.81139	398	NOT AVAILABLE	161	46.72	F	2c	Library3	CAGTCAC	GCATA
06c_89	Mullus barbatus	fresh	NOT AVAILABLE	6	41.4739	2.81139	398	NOT AVAILABLE	209	104.78	F	3	Library3	AGAGT	GAGATGT
06c_90	Mullus barbatus	fresh	NOT AVAILABLE	6	41.4739	2.81139	398	NOT AVAILABLE	201	84.82	M	4a	Library3	GCTAACA	CGATC
06c_91	Mullus barbatus	fresh	NOT AVAILABLE	6	41.4739	2.81139	398	NOT AVAILABLE	171	48.99	M	2c	Library3	ATGCT	CATCTGT
06c_92	Mullus barbatus	fresh	NOT AVAILABLE	6	41.4739	2.81139	398	NOT AVAILABLE	250	166.92	F	3	Library3	ACACGAG	CTGGT
06c_93	Mullus barbatus	fresh	NOT AVAILABLE	6	41.4739	2.81139	398	NOT AVAILABLE	237	144.7	F	3	Library3	GACTA	GTCAAGT
06c_94	Mullus barbatus	fresh	NOT AVAILABLE	6	41.4739	2.81139	398	NOT AVAILABLE	177	53.98	M	2c	Library3	AGGACAC	GAAGC
06c_95	Mullus barbatus	fresh	NOT AVAILABLE	6	41.4739	2.81139	398	NOT AVAILABLE	230	137.89	F	3	Library4	TCAGA	TAGCA
06c_96	Mullus barbatus	fresh	NOT AVAILABLE	6	41.4739	2.81139	398	NOT AVAILABLE	230	116.57	F	3	Library4	TGCAACA	AGCTGTC
06c_97	Mullus barbatus	fresh	NOT AVAILABLE	6	41.4739	2.81139	398	NOT AVAILABLE	212	93.89	F	3	Library4	GATCG	AGTCA
06c_98	Mullus barbatus	fresh	NOT AVAILABLE	6	41.4739	2.81139	398	NOT AVAILABLE	179	59.42	M	2c	Library4	CGTATCA	TACGTGT
06c_99	Mullus barbatus	fresh	NOT AVAILABLE	6	41.4739	2.81139	398	NOT AVAILABLE	195	70.76	M	3	Library4	CATGA	GCATA
06c_100	Mullus barbatus	fresh	NOT AVAILABLE	6	41.4739	2.81139	398	NOT AVAILABLE	246	141.97	F	3	Library4	CACAGAC	GAGATGT
07a_01	Mullus barbatus	fresh	2019-06-01 04:43:10	7	43.0672	4.8537	113.5	13.9	120	15	M	2c	Library2	TCAGA	GAAGC
07a_03	Mullus barbatus	fresh	2019-06-01 04:43:10	7	43.0672	4.8537	113.5	13.9	162	45	M	4a	Library2	TGCAACA	ATACGGT
07a_04	Mullus barbatus	fresh	2019-06-01 04:43:10	7	43.0672	4.8537	113.5	13.9	149	32	M	3	Library2	GATCG	TAGCA
07a_05	Mullus barbatus	fresh	2019-06-01 04:43:10	7	43.0672	4.8537	113.5	13.9	146	31	M	3	Library2	CGTATCA	AGCTGTC
07a_06	Mullus barbatus	fresh	2019-06-01 04:43:10	7	43.0672	4.8537	113.5	13.9	161	38	M	3	Library2	CATGA	AGTCA
07a_07	Mullus barbatus	fresh	2019-06-01 04:43:10	7	43.0672	4.8537	113.5	13.9	164	42	M	3	Library2	CACAGAC	TACGTGT
07a_08	Mullus barbatus	fresh	2019-06-01 04:43:10	7	43.0672	4.8537	113.5	13.9	164	45	M	3	Library2	ATCGA	GCATA
07a_09	Mullus barbatus	fresh	2019-06-01 04:43:10	7	43.0672	4.8537	113.5	13.9	160	39	M	3	Library2	ACTGCAC	GAGATGT
07a_10	Mullus barbatus	fresh	2019-06-01 04:43:10	7	43.0672	4.8537	113.5	13.9	140	26	M	3	Library2	TCGAG	CGATC
07a_11	Mullus barbatus	fresh	2019-06-01 04:43:10	7	43.0672	4.8537	113.5	13.9	165	45	M	3	Library2	TCTCTCA	CATCTGT
07a_12	Mullus barbatus	fresh	2019-06-01 04:43:10	7	43.0672	4.8537	113.5	13.9	151	36	M	3	Library2	GTCAC	CTGGT
07a_13	Mullus barbatus	fresh	2019-06-01 04:43:10	7	43.0672	4.8537	113.5	13.9	198	87	F	3	Library2	GTACACA	GTCAAGT
07a_14	Mullus barbatus	fresh	2019-06-01 04:43:10	7	43.0672	4.8537	113.5	13.9	216	119	F	3	Library2	GCATT	GAAGC
07a_15	Mullus barbatus	fresh	2019-06-01 04:43:10	7	43.0672	4.8537	113.5	13.9	208	94	F	3	Library2	CTCTTCA	ATACGGT
07a_16	Mullus barbatus	fresh	2019-06-01 04:43:10	7	43.0672	4.8537	113.5	13.9	203	92	F	3	Library2	CGATA	TAGCA
07a_17	Mullus barbatus	fresh	2019-06-01 04:43:10	7	43.0672	4.8537	113.5	13.9	227	144	F	3	Library2	CTAGGAC	AGCTGTC
07a_18	Mullus barbatus	fresh	2019-06-01 04:43:10	7	43.0672	4.8537	113.5	13.9	194	74	F	3	Library2	ACGTA	AGTCA
07a_19	Mullus barbatus	fresh	2019-06-01 06:31:16	7	43.0042	4.6933	117.5	13.9	255	178	F	3	Library2	CAGTCAC	TACGTGT
07a_20	Mullus barbatus	fresh	2019-06-01 06:31:16	7	43.0042	4.6933	117.5	13.9	250	170	F	3	Library2	AGAGT	GCATA
07a_21	Mullus barbatus	fresh	2019-06-01 06:31:16	7	43.0042	4.6933	117.5	13.9	226	138	F	3	Library2	GCTAACA	GAGATGT
07a_22	Mullus barbatus	fresh	2019-06-01 06:31:16	7	43.0042	4.6933	117.5	13.9	221	119	F	3	Library2	ATGCT	CGATC
07a_23	Mullus barbatus	fresh	2019-06-01 06:31:16	7	43.0042	4.6933	117.5	13.9	135	24	F	3	Library2	ACACGAG	CATCTGT
07a_24	Mullus barbatus	fresh	2019-06-01 06:31:16	7	43.0042	4.6933	117.5	13.9	185	60	F	3	Library2	GACTA	CTGGT
07a_25	Mullus barbatus	fresh	2019-06-01 06:31:16	7	43.0042	4.6933	117.5	13.9	156	38	F	3	Library2	AGGACAC	GTCAAGT
07a_26	Mullus barbatus	fresh	2019-06-01 06:31:16	7	43.0042	4.6933	117.5	13.9	210	101	F	3	Library2	TCAGA	ATACGGT
07a_27	Mullus barbatus	fresh	2019-06-01 06:31:16	7	43.0042	4.6933	117.5	13.9	223	120	F	3	Library2	TGCAACA	TAGCA
07a_28	Mullus barbatus	fresh	2019-06-01 06:31:16	7	43.0042	4.6933	117.5	13.9	250	166	F	3	Library2	GATCG	AGCTGTC
07a_29	Mullus barbatus	fresh	2019-06-01 06:31:16	7	43.0042	4.6933	117.5	13.9	136	24	F	3	Library2	CGTATCA	AGTCA
07a_30	Mullus barbatus	fresh	2019-06-02 04:36:29	7	43.0473	4.5143	111.5	13.92	125	18	M	2c	Library2	CATGA	TACGTGT
07a_31	Mullus barbatus	fresh	2019-06-02 04:36:29	7	43.0473	4.5143	111.5	13.92	134	23	M	2c	Library2	CACAGAC	GCATA
07a_32	Mullus barbatus	fresh	2019-06-02 04:36:29	7	43.0473	4.5143	111.5	13.92	163	44	M	3	Library2	ATCGA	GAGATGT
07a_33	Mullus barbatus	fresh	2019-06-02 04:36:29	7	43.0473	4.5143	111.5	13.92	167	43	M	3	Library2	ACTGCAC	CGATC
07a_34	Mullus barbatus	fresh	2019-06-02 04:36:29	7	43.0473	4.5143	111.5	13.92	137	27	M	3	Library2	TCGAG	CATCTGT
07a_35	Mullus barbatus	fresh	2019-06-02 04:36:29	7	43.0473	4.5143	111.5	13.92	180	52	M	3	Library2	TCTCTCA	CTGGT
07a_36	Mullus barbatus	fresh	2019-06-02 04:36:29	7	43.0473	4.5143	111.5	13.92	158	38	M	3	Library2	GTCAC	GTCAAGT
07a_37	Mullus barbatus	fresh	2019-06-02 04:36:29	7	43.0473	4.5143	111.5	13.92	157	35	M	3	Library2	GTACACA	GAAGC
07a_38	Mullus barbatus	fresh	2019-06-02 04:36:29	7	43.0473	4.5143	111.5	13.92	123	17	F	3	Library2	GCATT	ATACGGT
07a_39	Mullus barbatus	fresh	2019-06-02 04:36:29	7	43.0473	4.5143	111.5	13.92	172	52	F	3	Library2	CTCTTCA	TAGCA
07a_40	Mullus barbatus	fresh	2019-06-02 04:36:29	7	43.0473	4.5143	111.5	13.92	198	84	F	3	Library2	CGATA	AGCTGTC
07a_41	Mullus barbatus	fresh	2019-06-02 04:36:29	7	43.0473	4.5143	111.5	13.92	237	141	F	3	Library2	CTAGGAC	AGTCA
07a_42	Mullus barbatus	fresh	2019-06-02 04:36:29	7	43.0473	4.5143	111.5	13.92	172	54	F	3	Library2	ACGTA	TACGTGT
07a_43	Mullus barbatus	fresh	2019-06-02 04:36:29	7	43.0473	4.5143	111.5	13.92	203	99	F	3	Library2	CAGTCAC	GCATA
07a_44	Mullus barbatus	fresh	2019-06-02 04:36:29	7	43.0473	4.5143	111.5	13.92	144	30	F	3	Library2	AGAGT	GAGATGT
07a_45	Mullus barbatus	fresh	2019-06-02 04:36:29	7	43.0473	4.5143	111.5	13.92	229	137	F	3	Library2	GCTAACA	CGATC
07a_46	Mullus barbatus	fresh	2019-06-02 04:36:29	7	43.0473	4.5143	111.5	13.92	230	146	F	3	Library2	ATGCT	CATCTGT
07a_48	Mullus barbatus	fresh	2019-06-02 04:36:29	7	43.0473	4.5143	111.5	13.92	188	71	F	3	Library2	ACACGAG	CTGGT
07a_49	Mullus barbatus	fresh	2019-06-02 04:36:29	7	43.0473	4.5143	111.5	13.92	220	103	F	3	Library2	GACTA	GTCAAGT
07a_50	Mullus barbatus	fresh	2019-06-02 04:36:29	7	43.0473	4.5143	111.5	13.92	170	53	F	3	Library2	AGGACAC	GAAGC
08ab_01	Mullus barbatus	fresh	2019-05-24 06:17:00	8	42.6813	9.573	273	14.45	183	67	M	3	Library3	TCAGA	GCATA
08ab_02	Mullus barbatus	fresh	2019-05-24 06:17:00	8	42.6813	9.573	273	14.45	230	147	F	3	Library3	TGCAACA	GAGATGT
08ab_03	Mullus barbatus	fresh	2019-05-24 06:17:00	8	42.6813	9.573	273	14.45	207	89	F	3	Library3	GATCG	CGATC
08ab_04	Mullus barbatus	fresh	2019-05-24 06:17:00	8	42.6813	9.573	273	14.45	238	168	F	3	Library3	CGTATCA	CATCTGT
08ab_05	Mullus barbatus	fresh	2019-05-24 09:16:00	8	42.6243	9.6608	355.6	14.45	198	78	M	3	Library3	CATGA	CTGGT
08ab_06	Mullus barbatus	fresh	2019-05-24 11:33:00	8	42.477	9.623	87.6	14.425	162	44	M	3	Library3	CACAGAC	GTCAAGT
08ab_07	Mullus barbatus	fresh	2019-05-24 11:33:00	8	42.477	9.623	87.6	14.425	174	55	M	3	Library3	ATCGA	GAAGC
08ab_08	Mullus barbatus	fresh	2019-05-24 11:33:00	8	42.477	9.623	87.6	14.425	157	40	M	3	Library3	ACTGCAC	ATACGGT
08ab_09	Mullus barbatus	fresh	2019-05-24 11:33:00	8	42.477	9.623	87.6	14.425	173	58	M	3	Library3	TCGAG	TAGCA
08ab_10	Mullus barbatus	fresh	2019-05-24 11:33:00	8	42.477	9.623	87.6	14.425	144	32	M	3	Library3	TCTCTCA	AGCTGTC
08ab_11	Mullus barbatus	fresh	2019-05-24 11:33:00	8	42.477	9.623	87.6	14.425	184	71	F	3	Library3	GTCAC	AGTCA
08ab_12	Mullus barbatus	fresh	2019-05-24 11:33:00	8	42.477	9.623	87.6	14.425	207	108	F	3	Library3	GTACACA	TACGTGT
08ab_13	Mullus barbatus	fresh	2019-05-24 11:33:00	8	42.477	9.623	87.6	14.425	183	66	F	3	Library3	GCATT	GCATA
08ab_14	Mullus barbatus	fresh	2019-05-24 11:33:00	8	42.477	9.623	87.6	14.425	202	104	F	3	Library3	CTCTTCA	GAGATGT
08ab_15	Mullus barbatus	fresh	2019-05-24 11:33:00	8	42.477	9.623	87.6	14.425	195	82	F	3	Library3	CGATA	CGATC
08ab_16	Mullus barbatus	fresh	2019-05-24 11:33:00	8	42.477	9.623	87.6	14.425	162	45	F	3	Library3	CTAGGAC	CATCTGT
08ab_17	Mullus barbatus	fresh	2019-05-24 11:33:00	8	42.477	9.623	87.6	14.425	168	50	F	3	Library3	ACGTA	CTGGT
08ab_18	Mullus barbatus	fresh	2019-05-24 11:33:00	8	42.477	9.623	87.6	14.425	193	79	F	3	Library3	CAGTCAC	GTCAAGT
08ab_19	Mullus barbatus	fresh	2019-05-24 11:33:00	8	42.477	9.623	87.6	14.425	181	67	F	3	Library3	AGAGT	GAAGC
08ab_20	Mullus barbatus	fresh	2019-05-24 11:33:00	8	42.477	9.623	87.6	14.425	204	95	F	3	Library3	GCTAACA	ATACGGT
08ab_21	Mullus barbatus	fresh	2019-05-25 04:57:00	8	41.4687	9.4778	91.5	14.25	161	45	F	3	Library3	ATGCT	TAGCA
08ab_22	Mullus barbatus	fresh	2019-05-26 05:53:00	8	41.6162	9.4713	110.5	14.4	171	50	M	3	Library3	ACACGAG	AGCTGTC
08ab_23	Mullus barbatus	fresh	2019-05-26 05:53:00	8	41.6162	9.4713	110.5	14.4	152	33	M	3	Library3	GACTA	AGTCA
08ab_24	Mullus barbatus	fresh	2019-05-26 05:53:00	8	41.6162	9.4713	110.5	14.4	172	56	M	3	Library3	AGGACAC	TACGTGT
08ab_25	Mullus barbatus	fresh	2019-05-26 05:53:00	8	41.6162	9.4713	110.5	14.4	179	63	F	3	Library3	TCAGA	GAGATGT
08ab_26	Mullus barbatus	fresh	2019-05-26 05:53:00	8	41.6162	9.4713	110.5	14.4	175	64	F	3	Library3	TGCAACA	CGATC
08ab_27	Mullus barbatus	fresh	2019-05-26 05:53:00	8	41.6162	9.4713	110.5	14.4	174	54	F	3	Library3	GATCG	CATCTGT
08ab_28	Mullus barbatus	fresh	2019-05-26 05:53:00	8	41.6162	9.4713	110.5	14.4	189	78	F	3	Library3	CGTATCA	CTGGT
08ab_29	Mullus barbatus	fresh	2019-05-26 05:53:00	8	41.6162	9.4713	110.5	14.4	173	64	F	3	Library3	CATGA	GTCAAGT
08ab_30	Mullus barbatus	fresh	2019-05-26 05:53:00	8	41.6162	9.4713	110.5	14.4	145	33	F	3	Library3	CACAGAC	GAAGC
08ab_31	Mullus barbatus	fresh	2019-05-26 05:53:00	8	41.6162	9.4713	110.5	14.4	182	65	F	3	Library3	ATCGA	ATACGGT
08ab_32	Mullus barbatus	fresh	2019-05-26 08:12:00	8	41.8265	9.4393	73.5	14.3	103	9	M	2c	Library3	ACTGCAC	TAGCA
08ab_33	Mullus barbatus	fresh	2019-05-26 08:12:00	8	41.8265	9.4393	73.5	14.3	133	23	M	3	Library3	TCGAG	AGCTGTC
08ab_34	Mullus barbatus	fresh	2019-05-26 08:12:00	8	41.8265	9.4393	73.5	14.3	178	52	F	3	Library3	TCTCTCA	AGTCA
08ab_35	Mullus barbatus	fresh	2019-05-26 08:12:00	8	41.8265	9.4393	73.5	14.3	168	50	F	3	Library3	GTCAC	TACGTGT
08ab_36	Mullus barbatus	fresh	2019-05-26 08:12:00	8	41.8265	9.4393	73.5	14.3	134	22	F	3	Library3	GTACACA	GCATA
08ab_37	Mullus barbatus	fresh	2019-05-26 08:12:00	8	41.8265	9.4393	73.5	14.3	177	56	F	3	Library3	GCATT	GAGATGT
08ab_39	Mullus barbatus	fresh	2019-05-26 14:01:00	8	41.9292	9.5457	137	14.45	141	26	M	3	Library3	CTCTTCA	CGATC
08ab_40	Mullus barbatus	fresh	2019-05-26 14:01:00	8	41.9292	9.5457	137	14.45	187	62	F	3	Library3	CGATA	CATCTGT
08ab_41	Mullus barbatus	fresh	2019-05-26 14:01:00	8	41.9292	9.5457	137	14.45	177	60	F	3	Library3	CTAGGAC	CTGGT
08ab_42	Mullus barbatus	fresh	2019-05-26 14:01:00	8	41.9292	9.5457	137	14.45	189	74	F	3	Library3	ACGTA	GTCAAGT
08ab_43	Mullus barbatus	fresh	2019-05-26 14:01:00	8	41.9292	9.5457	137	14.45	202	88	F	3	Library3	CAGTCAC	GAAGC
08ab_44	Mullus barbatus	fresh	2019-05-26 14:01:00	8	41.9292	9.5457	137	14.45	174	62	F	3	Library3	AGAGT	ATACGGT
08ab_45	Mullus barbatus	fresh	2019-05-29 07:49:00	8	42.3582	9.6042	87	14.27	179	61	F	3	Library3	GCTAACA	TAGCA
08ab_46	Mullus barbatus	fresh	2019-05-29 07:49:00	8	42.3582	9.6042	87	14.27	163	41	F	3	Library3	ATGCT	AGCTGTC
08ab_47	Mullus barbatus	fresh	2019-05-29 07:49:00	8	42.3582	9.6042	87	14.27	166	44	F	3	Library3	ACACGAG	AGTCA
08ab_49	Mullus barbatus	fresh	2019-05-29 07:49:00	8	42.3582	9.6042	87	14.27	185	71	F	3	Library3	GACTA	TACGTGT
08ab_50	Mullus barbatus	fresh	2019-05-29 07:49:00	8	42.3582	9.6042	87	14.27	170	48	F	3	Library3	AGGACAC	GCATA
09a_04	Mullus barbatus	frozen	2019-11-06	9	43.9982	8.21748	89	NOT AVAILABLE	157	37.1	M	3	Library5	TCAGA	TAGCA
09a_05	Mullus barbatus	frozen	2019-11-06	9	43.9982	8.21748	89	NOT AVAILABLE	157	41.7	M	3	Library5	TGCAACA	AGCTGTC
09a_07	Mullus barbatus	frozen	2019-11-06	9	43.9982	8.21748	89	NOT AVAILABLE	182	59.4	M	3	Library5	GATCG	AGTCA
09a_08	Mullus barbatus	frozen	2019-11-06	9	43.9982	8.21748	89	NOT AVAILABLE	148	33.5	M	3	Library5	CGTATCA	TACGTGT
09a_10	Mullus barbatus	frozen	2019-11-06	9	43.9982	8.21748	89	NOT AVAILABLE	137	26.3	M	3	Library5	CATGA	GCATA
09a_14	Mullus barbatus	frozen	2019-11-06	9	43.9982	8.21748	89	NOT AVAILABLE	156	34.7	M	3	Library5	CACAGAC	GAGATGT
09a_15	Mullus barbatus	frozen	2019-11-06	9	43.9982	8.21748	89	NOT AVAILABLE	148	32.5	M	3	Library5	ATCGA	CGATC
09a_17	Mullus barbatus	frozen	2019-11-06	9	43.9982	8.21748	89	NOT AVAILABLE	148	31.5	M	3	Library5	ACTGCAC	CATCTGT
09a_18	Mullus barbatus	frozen	2019-11-06	9	43.9982	8.21748	89	NOT AVAILABLE	135	23.1	M	3	Library5	TCGAG	CTGGT
09a_28	Mullus barbatus	frozen	2019-11-06	9	43.9982	8.21748	89	NOT AVAILABLE	223	123.8	F	3	Library5	TCTCTCA	GTCAAGT
09a_31	Mullus barbatus	frozen	2019-11-06	9	43.9982	8.21748	89	NOT AVAILABLE	181	30.1	F	4B	Library5	GTCAC	GAAGC
09a_32	Mullus barbatus	frozen	2019-11-06	9	43.9982	8.21748	89	NOT AVAILABLE	206	103.9	F	3	Library5	GTACACA	ATACGGT
09a_39	Mullus barbatus	frozen	2019-11-06	9	43.9982	8.21748	89	NOT AVAILABLE	169	49.1	F	3	Library5	GCATT	TAGCA
09a_43	Mullus barbatus	frozen	2019-11-06	9	43.9982	8.21748	89	NOT AVAILABLE	190	76.8	F	3	Library5	CTCTTCA	AGCTGTC
09a_44	Mullus barbatus	frozen	2019-11-06	9	43.9982	8.21748	89	NOT AVAILABLE	163	52.7	F	3	Library5	CGATA	AGTCA
09a_50	Mullus barbatus	frozen	2019-11-06	9	43.9982	8.21748	89	NOT AVAILABLE	200	102	F	3	Library5	CTAGGAC	TACGTGT
09b_01	Mullus barbatus	NOT AVAILABLE	2019-02-14	9	42.6116	10.9942	100	NOT AVAILABLE	156	37.1	M	2c	Library1	TCAGA	TAGCA
09b_02	Mullus barbatus	NOT AVAILABLE	2019-02-14	9	42.6116	10.9942	100	NOT AVAILABLE	173	50	M	2c	Library1	TGCAACA	AGCTGTC
09b_03	Mullus barbatus	NOT AVAILABLE	2019-02-14	9	42.6116	10.9942	100	NOT AVAILABLE	167	49	M	2c	Library1	GATCG	AGTCA
09b_04	Mullus barbatus	NOT AVAILABLE	2019-02-14	9	42.6116	10.9942	100	NOT AVAILABLE	160	41.1	M	2c	Library1	CGTATCA	TACGTGT
09b_05	Mullus barbatus	NOT AVAILABLE	2019-02-14	9	42.6116	10.9942	100	NOT AVAILABLE	128	20.1	M	2b	Library1	CATGA	GCATA
09b_06	Mullus barbatus	NOT AVAILABLE	2019-02-14	9	42.6116	10.9942	100	NOT AVAILABLE	147	27.2	M	2c	Library1	CACAGAC	GAGATGT
09b_07	Mullus barbatus	NOT AVAILABLE	2019-02-14	9	42.6116	10.9942	100	NOT AVAILABLE	145	30.5	M	2c	Library1	ATCGA	CGATC
09b_08	Mullus barbatus	NOT AVAILABLE	2019-02-14	9	42.6116	10.9942	100	NOT AVAILABLE	145	29.3	M	2c	Library1	ACTGCAC	CATCTGT
09b_09	Mullus barbatus	NOT AVAILABLE	2019-02-14	9	42.6116	10.9942	100	NOT AVAILABLE	133	20.9	M	2c	Library1	TCGAG	CTGGT
09b_10	Mullus barbatus	NOT AVAILABLE	2019-02-14	9	42.6116	10.9942	100	NOT AVAILABLE	135	21.7	M	2c	Library1	TCTCTCA	GTCAAGT
09b_11	Mullus barbatus	NOT AVAILABLE	2019-02-14	9	42.6116	10.9942	100	NOT AVAILABLE	160	38.5	M	2c	Library1	GTCAC	GAAGC
09b_12	Mullus barbatus	NOT AVAILABLE	2019-02-14	9	42.6116	10.9942	100	NOT AVAILABLE	139	25.6	M	2c	Library1	GTACACA	ATACGGT
09b_13	Mullus barbatus	NOT AVAILABLE	2019-02-14	9	42.6116	10.9942	100	NOT AVAILABLE	155	40.8	M	2c	Library1	GCATT	TAGCA
09b_14	Mullus barbatus	NOT AVAILABLE	2019-02-14	9	42.6116	10.9942	100	NOT AVAILABLE	149	32.9	M	2c	Library1	CTCTTCA	AGCTGTC
09b_15	Mullus barbatus	NOT AVAILABLE	2019-02-14	9	42.6116	10.9942	100	NOT AVAILABLE	141	24.3	M	2c	Library1	CGATA	AGTCA
09b_16	Mullus barbatus	NOT AVAILABLE	2019-02-14	9	42.6116	10.9942	100	NOT AVAILABLE	147	31.5	M	2c	Library1	CTAGGAC	TACGTGT
09b_17	Mullus barbatus	NOT AVAILABLE	2019-02-14	9	42.6116	10.9942	100	NOT AVAILABLE	136	23.4	M	2c	Library1	ACGTA	GCATA
09b_18	Mullus barbatus	NOT AVAILABLE	2019-02-14	9	42.6116	10.9942	100	NOT AVAILABLE	129	20.9	M	2c	Library1	CAGTCAC	GAGATGT
09b_19	Mullus barbatus	NOT AVAILABLE	2019-02-14	9	42.6116	10.9942	100	NOT AVAILABLE	136	24.3	M	2c	Library1	AGAGT	CGATC
09b_20	Mullus barbatus	NOT AVAILABLE	2019-02-14	9	42.6116	10.9942	100	NOT AVAILABLE	127	19.3	M	2c	Library1	GCTAACA	CATCTGT
09b_21	Mullus barbatus	NOT AVAILABLE	2019-02-14	9	42.6116	10.9942	100	NOT AVAILABLE	138	25.2	M	2c	Library1	ATGCT	CTGGT
09b_22	Mullus barbatus	NOT AVAILABLE	2019-02-14	9	42.6116	10.9942	100	NOT AVAILABLE	137	22.8	M	2c	Library1	ACACGAG	GTCAAGT
09b_23	Mullus barbatus	NOT AVAILABLE	2019-02-14	9	42.6116	10.9942	100	NOT AVAILABLE	146	29.3	M	2c	Library1	GACTA	GAAGC
09b_24	Mullus barbatus	NOT AVAILABLE	2019-02-14	9	42.6116	10.9942	100	NOT AVAILABLE	143	27.6	M	2b	Library1	AGGACAC	ATACGGT
09b_25	Mullus barbatus	NOT AVAILABLE	2019-02-14	9	42.6116	10.9942	100	NOT AVAILABLE	150	35.3	M	2c	Library1	TCAGA	AGCTGTC
09b_26	Mullus barbatus	NOT AVAILABLE	2019-02-14	9	42.6116	10.9942	100	NOT AVAILABLE	211	111.4	F	4B	Library1	TGCAACA	AGTCA
09b_27	Mullus barbatus	NOT AVAILABLE	2019-02-14	9	42.6116	10.9942	100	NOT AVAILABLE	207	94.9	F	2b	Library1	GATCG	TACGTGT
09b_28	Mullus barbatus	NOT AVAILABLE	2019-02-14	9	42.6116	10.9942	100	NOT AVAILABLE	217	105.5	F	2b	Library1	CGTATCA	GCATA
09b_29	Mullus barbatus	NOT AVAILABLE	2019-02-14	9	42.6116	10.9942	100	NOT AVAILABLE	192	74.4	F	2b	Library1	CATGA	GAGATGT
09b_30	Mullus barbatus	NOT AVAILABLE	2019-02-14	9	42.6116	10.9942	100	NOT AVAILABLE	198	84.6	F	4B	Library1	CACAGAC	CGATC
09b_31	Mullus barbatus	NOT AVAILABLE	2019-02-14	9	42.6116	10.9942	100	NOT AVAILABLE	183	66.8	F	4B	Library1	ATCGA	CATCTGT
09b_32	Mullus barbatus	NOT AVAILABLE	2019-02-14	9	42.6116	10.9942	100	NOT AVAILABLE	188	72.2	F	2b	Library1	ACTGCAC	CTGGT
09b_33	Mullus barbatus	NOT AVAILABLE	2019-02-14	9	42.6116	10.9942	100	NOT AVAILABLE	193	82.3	F	4B	Library1	TCGAG	GTCAAGT
09b_34	Mullus barbatus	NOT AVAILABLE	2019-02-14	9	42.6116	10.9942	100	NOT AVAILABLE	195	78.1	F	2b	Library1	TCTCTCA	GAAGC
09b_35	Mullus barbatus	NOT AVAILABLE	2019-02-14	9	42.6116	10.9942	100	NOT AVAILABLE	189	70.1	F	2b	Library1	GTCAC	ATACGGT
09b_36	Mullus barbatus	NOT AVAILABLE	2019-02-14	9	42.6116	10.9942	100	NOT AVAILABLE	218	113.3	F	2b	Library1	GTACACA	TAGCA
09b_37	Mullus barbatus	NOT AVAILABLE	2019-02-14	9	42.6116	10.9942	100	NOT AVAILABLE	192	85.9	F	2b	Library1	GCATT	AGCTGTC
09b_38	Mullus barbatus	NOT AVAILABLE	2019-02-14	9	42.6116	10.9942	100	NOT AVAILABLE	205	82.4	F	2b	Library1	CTCTTCA	AGTCA
09b_39	Mullus barbatus	NOT AVAILABLE	2019-02-14	9	42.6116	10.9942	100	NOT AVAILABLE	188	73.9	F	2b	Library1	CGATA	TACGTGT
09b_40	Mullus barbatus	NOT AVAILABLE	2019-02-14	9	42.6116	10.9942	100	NOT AVAILABLE	194	76	F	2b	Library1	CTAGGAC	GCATA
09b_41	Mullus barbatus	NOT AVAILABLE	2019-02-14	9	42.6116	10.9942	100	NOT AVAILABLE	190	66.4	F	2b	Library1	ACGTA	GAGATGT
09b_42	Mullus barbatus	NOT AVAILABLE	2019-02-14	9	42.6116	10.9942	100	NOT AVAILABLE	197	79.9	F	4B	Library1	CAGTCAC	CGATC
09b_43	Mullus barbatus	NOT AVAILABLE	2019-02-14	9	42.6116	10.9942	100	NOT AVAILABLE	198	79.4	F	2b	Library1	AGAGT	CATCTGT
09b_44	Mullus barbatus	NOT AVAILABLE	2019-02-14	9	42.6116	10.9942	100	NOT AVAILABLE	185	68.9	F	2b	Library1	GCTAACA	CTGGT
09b_45	Mullus barbatus	NOT AVAILABLE	2019-02-14	9	42.6116	10.9942	100	NOT AVAILABLE	185	73.2	F	2b	Library1	ATGCT	GTCAAGT
09b_46	Mullus barbatus	NOT AVAILABLE	2019-02-14	9	42.6116	10.9942	100	NOT AVAILABLE	187	66.6	F	2b	Library1	ACACGAG	GAAGC
09b_47	Mullus barbatus	NOT AVAILABLE	2019-02-14	9	42.6116	10.9942	100	NOT AVAILABLE	191	70	F	2b	Library1	GACTA	ATACGGT
09b_48	Mullus barbatus	NOT AVAILABLE	2019-02-14	9	42.6116	10.9942	100	NOT AVAILABLE	217	117.7	F	2b	Library1	AGGACAC	TAGCA
09b_49	Mullus barbatus	NOT AVAILABLE	2019-02-14	9	42.6116	10.9942	100	NOT AVAILABLE	207	100.9	F	2b	Library1	TCAGA	AGTCA
09b_50	Mullus barbatus	NOT AVAILABLE	2019-02-14	9	42.6116	10.9942	100	NOT AVAILABLE	188	70.4	F	2b	Library1	TGCAACA	TACGTGT
10a_01	Mullus barbatus	frozen	2019-06-26	10	41.0295	13.6938	109	NOT AVAILABLE	145	36.5	M	3	Library5	ACGTA	GCATA
10a_02	Mullus barbatus	frozen	2019-06-26	10	41.0295	13.6938	109	NOT AVAILABLE	195	78	F	2c	Library5	CAGTCAC	GAGATGT
10a_03	Mullus barbatus	frozen	2019-06-26	10	41.0295	13.6938	109	NOT AVAILABLE	165	46.5	F	2c	Library5	AGAGT	CGATC
10a_04	Mullus barbatus	frozen	2019-06-26	10	41.0295	13.6938	109	NOT AVAILABLE	190	73	F	2c	Library5	GCTAACA	CATCTGT
10a_05	Mullus barbatus	frozen	2019-06-26	10	41.0295	13.6938	109	NOT AVAILABLE	185	67	F	2c	Library5	ATGCT	CTGGT
10a_06	Mullus barbatus	frozen	2019-06-26	10	41.0295	13.6938	109	NOT AVAILABLE	145	33	M	2c	Library5	ACACGAG	GTCAAGT
10a_07	Mullus barbatus	frozen	2019-06-26	10	41.0295	13.6938	109	NOT AVAILABLE	150	36.5	M	2c	Library5	GACTA	GAAGC
10a_08	Mullus barbatus	frozen	2019-06-26	10	41.0295	13.6938	109	NOT AVAILABLE	145	34.5	M	2b	Library5	AGGACAC	ATACGGT
10a_09	Mullus barbatus	frozen	2019-06-26	10	41.0295	13.6938	109	NOT AVAILABLE	155	42	M	2c	Library5	TCAGA	AGCTGTC
10a_10	Mullus barbatus	frozen	2019-06-26	10	41.0295	13.6938	109	NOT AVAILABLE	210	114.5	F	2c	Library5	TGCAACA	AGTCA
10a_11	Mullus barbatus	frozen	2019-06-26	10	41.0295	13.6938	109	NOT AVAILABLE	140	29	M	2b	Library5	GATCG	TACGTGT
10a_12	Mullus barbatus	frozen	2019-06-26	10	41.0295	13.6938	109	NOT AVAILABLE	140	28.5	M	2b	Library5	CGTATCA	GCATA
10a_13	Mullus barbatus	frozen	2019-06-26	10	41.0295	13.6938	109	NOT AVAILABLE	170	52.5	F	2c	Library5	CATGA	GAGATGT
10a_14	Mullus barbatus	frozen	2019-06-26	10	41.0295	13.6938	109	NOT AVAILABLE	190	76	F	2b	Library5	CACAGAC	CGATC
10a_17	Mullus barbatus	frozen	2019-06-28	10	40.4648	14.8662	42.3	NOT AVAILABLE	145	32	F	2c	Library5	ATCGA	CATCTGT
10a_20	Mullus barbatus	frozen	2019-06-28	10	40.4648	14.8662	42.3	NOT AVAILABLE	180	60.5	F	3	Library5	ACTGCAC	CTGGT
10a_21	Mullus barbatus	frozen	2019-06-28	10	40.4648	14.8662	42.3	NOT AVAILABLE	140	24	F	2b	Library5	TCGAG	GTCAAGT
10a_22	Mullus barbatus	frozen	2019-06-28	10	40.4648	14.8662	42.3	NOT AVAILABLE	130	25	M	2b	Library5	TCTCTCA	GAAGC
10a_23	Mullus barbatus	frozen	2019-06-28	10	40.4648	14.8662	42.3	NOT AVAILABLE	140	28	M	2b	Library5	GTCAC	ATACGGT
10a_24	Mullus barbatus	frozen	2019-06-28	10	40.4648	14.8662	42.3	NOT AVAILABLE	135	22	M	2a	Library5	GTACACA	TAGCA
10a_25	Mullus barbatus	frozen	2019-06-28	10	40.4648	14.8662	42.3	NOT AVAILABLE	135	22.5	M	2b	Library5	GCATT	AGCTGTC
10a_28	Mullus barbatus	frozen	2019-06-28	10	40.4648	14.8662	42.3	NOT AVAILABLE	150	29	F	2b	Library5	CTCTTCA	AGTCA
10a_31	Mullus barbatus	frozen	2019-07-01	10	39.6692	15.7657	116	NOT AVAILABLE	150	34.5	M	2b	Library5	CGATA	TACGTGT
10a_33	Mullus barbatus	frozen	2019-07-01	10	39.6692	15.7657	116	NOT AVAILABLE	165	40	M	2c	Library5	CTAGGAC	GCATA
10a_34	Mullus barbatus	frozen	2019-07-01	10	39.6692	15.7657	116	NOT AVAILABLE	165	44	F	2b	Library5	ACGTA	GAGATGT
10a_36	Mullus barbatus	frozen	2019-07-01	10	39.6692	15.7657	116	NOT AVAILABLE	185	61	F	2b	Library5	CAGTCAC	CGATC
10a_37	Mullus barbatus	frozen	2019-07-01	10	39.6692	15.7657	116	NOT AVAILABLE	205	89	F	2c	Library5	AGAGT	CATCTGT
10a_39	Mullus barbatus	frozen	2019-07-01	10	39.6692	15.7657	116	NOT AVAILABLE	205	87	M	2b	Library5	GCTAACA	CTGGT
10a_40	Mullus barbatus	frozen	2019-07-01	10	39.6692	15.7657	116	NOT AVAILABLE	200	96	F	3	Library5	ATGCT	GTCAAGT
10a_41	Mullus barbatus	frozen	2019-07-01	10	39.6692	15.7657	116	NOT AVAILABLE	150	33.5	M	2a	Library5	ACACGAG	GAAGC
10a_43	Mullus barbatus	frozen	2019-07-01	10	39.6692	15.7657	116	NOT AVAILABLE	160	38	M	2b	Library5	GACTA	ATACGGT
10a_44	Mullus barbatus	frozen	2019-07-01	10	39.6692	15.7657	116	NOT AVAILABLE	165	46.5	M	2b	Library5	AGGACAC	TAGCA
10a_48	Mullus barbatus	frozen	2019-07-01	10	39.6692	15.7657	116	NOT AVAILABLE	210	94	F	2c	Library5	TCAGA	AGTCA
10bc_01	Mullus barbatus	frozen	2019-07-08	10	38.09	12.9866	82	NOT AVAILABLE	130	23.5	M	2c	Library3	TCAGA	TAGCA
10bc_02	Mullus barbatus	frozen	2019-07-08	10	38.09	12.9866	82	NOT AVAILABLE	155	38	F	2c	Library3	TGCAACA	AGCTGTC
10bc_03	Mullus barbatus	frozen	2019-07-08	10	38.09	12.9866	82	NOT AVAILABLE	170	50.5	M	2c	Library3	GATCG	AGTCA
10bc_04	Mullus barbatus	frozen	2019-07-08	10	38.09	12.9866	82	NOT AVAILABLE	150	33.5	M	2c	Library3	CGTATCA	TACGTGT
10bc_05	Mullus barbatus	frozen	2019-07-08	10	38.09	12.9866	82	NOT AVAILABLE	190	59.5	F	3	Library3	CATGA	GCATA
10bc_06	Mullus barbatus	frozen	2019-07-08	10	38.09	12.9866	82	NOT AVAILABLE	180	57	M	2c	Library3	CACAGAC	GAGATGT
10bc_07	Mullus barbatus	frozen	2019-07-08	10	38.09	12.9866	82	NOT AVAILABLE	185	67	F	3	Library3	ATCGA	CGATC
10bc_08	Mullus barbatus	frozen	2019-07-08	10	38.09	12.9866	82	NOT AVAILABLE	190	74.5	F	3	Library3	ACTGCAC	CATCTGT
10bc_09	Mullus barbatus	frozen	2019-07-08	10	38.09	12.9866	82	NOT AVAILABLE	215	101	M	3	Library3	TCGAG	CTGGT
10bc_10	Mullus barbatus	frozen	2019-07-08	10	38.09	12.9866	82	NOT AVAILABLE	195	75	M	2c	Library3	TCTCTCA	GTCAAGT
10bc_11	Mullus barbatus	frozen	2019-07-08	10	38.09	12.9866	82	NOT AVAILABLE	140	27	F	1	Library3	GTCAC	GAAGC
10bc_12	Mullus barbatus	frozen	2019-07-08	10	38.09	12.9866	82	NOT AVAILABLE	155	33	M	2c	Library3	GTACACA	ATACGGT
10bc_13	Mullus barbatus	frozen	2019-07-08	10	38.09	12.9866	82	NOT AVAILABLE	145	31	M	2b	Library3	GCATT	TAGCA
10bc_14	Mullus barbatus	frozen	2019-07-08	10	38.09	12.9866	82	NOT AVAILABLE	150	30	M	2c	Library3	CTCTTCA	AGCTGTC
10bc_15	Mullus barbatus	frozen	2019-07-08	10	38.09	12.9866	82	NOT AVAILABLE	145	29	M	2c	Library3	CGATA	AGTCA
10bc_16	Mullus barbatus	frozen	2019-07-08	10	38.09	12.9866	82	NOT AVAILABLE	145	36	M	2b	Library3	CTAGGAC	TACGTGT
10bc_17	Mullus barbatus	frozen	2019-07-08	10	38.09	12.9866	82	NOT AVAILABLE	175	52	F	2b	Library3	ACGTA	GCATA
10bc_18	Mullus barbatus	frozen	2019-07-08	10	38.09	12.9866	82	NOT AVAILABLE	165	52	M	2b	Library3	CAGTCAC	GAGATGT
10bc_19	Mullus barbatus	frozen	2019-07-08	10	38.09	12.9866	82	NOT AVAILABLE	200	71.5	F	3	Library3	AGAGT	CGATC
10bc_20	Mullus barbatus	frozen	2019-07-08	10	38.09	12.9866	82	NOT AVAILABLE	200	74	F	2b	Library3	GCTAACA	CATCTGT
10bc_21	Mullus barbatus	frozen	2019-07-08	10	38.09	12.9866	82	NOT AVAILABLE	140	28	F	1	Library3	ATGCT	CTGGT
10bc_22	Mullus barbatus	frozen	2019-07-08	10	38.09	12.9866	82	NOT AVAILABLE	155	33	M	2b	Library3	ACACGAG	GTCAAGT
10bc_23	Mullus barbatus	frozen	2019-07-08	10	38.09	12.9866	82	NOT AVAILABLE	155	39.5	M	2b	Library3	GACTA	GAAGC
10bc_24	Mullus barbatus	frozen	2019-07-08	10	38.09	12.9866	82	NOT AVAILABLE	160	37.5	F	2c	Library3	AGGACAC	ATACGGT
10bc_25	Mullus barbatus	frozen	2019-07-08	10	38.09	12.9866	82	NOT AVAILABLE	170	51	M	3	Library3	TCAGA	AGCTGTC
10bc_26	Mullus barbatus	frozen	2019-07-08	10	38.09	12.9866	82	NOT AVAILABLE	180	59.5	M	2b	Library3	TGCAACA	AGTCA
10bc_27	Mullus barbatus	frozen	2019-07-08	10	38.09	12.9866	82	NOT AVAILABLE	185	62	F	2b	Library3	GATCG	TACGTGT
10bc_28	Mullus barbatus	frozen	2019-07-08	10	38.09	12.9866	82	NOT AVAILABLE	190	67	F	2c	Library3	CGTATCA	GCATA
10bc_29	Mullus barbatus	frozen	2019-07-08	10	38.09	12.9866	82	NOT AVAILABLE	190	66.5	M	2b	Library3	CATGA	GAGATGT
10bc_30	Mullus barbatus	frozen	2019-07-08	10	38.09	12.9866	82	NOT AVAILABLE	230	107	F	3	Library3	CACAGAC	CGATC
10bc_31	Mullus barbatus	frozen	2019-07-07	10	38.1059	12.9923	103	NOT AVAILABLE	150	33	M	2b	Library3	ATCGA	CATCTGT
10bc_32	Mullus barbatus	frozen	2019-07-07	10	38.1059	12.9923	103	NOT AVAILABLE	145	34.5	M	2b	Library3	ACTGCAC	CTGGT
10bc_33	Mullus barbatus	frozen	2019-07-07	10	38.1059	12.9923	103	NOT AVAILABLE	150	37	M	2b	Library3	TCGAG	GTCAAGT
10bc_35	Mullus barbatus	frozen	2019-07-07	10	38.1059	12.9923	103	NOT AVAILABLE	165	45	M	2c	Library3	TCTCTCA	GAAGC
10bc_36	Mullus barbatus	frozen	2019-07-07	10	38.1059	12.9923	103	NOT AVAILABLE	170	46.5	M	2c	Library3	GTCAC	ATACGGT
10bc_37	Mullus barbatus	frozen	2019-07-07	10	38.1059	12.9923	103	NOT AVAILABLE	175	53.5	M	3	Library3	GTACACA	TAGCA
10bc_38	Mullus barbatus	frozen	2019-07-07	10	38.1059	12.9923	103	NOT AVAILABLE	170	51.5	M	2b	Library3	GCATT	AGCTGTC
10bc_39	Mullus barbatus	frozen	2019-07-07	10	38.1059	12.9923	103	NOT AVAILABLE	190	69.6	F	3	Library3	CTCTTCA	AGTCA
10bc_40	Mullus barbatus	frozen	2019-07-07	10	38.1059	12.9923	103	NOT AVAILABLE	235	124.5	F	3	Library3	CGATA	TACGTGT
10bc_41	Mullus barbatus	frozen	2019-07-07	10	38.1059	12.9923	103	NOT AVAILABLE	150	29	F	2a	Library3	CTAGGAC	GCATA
10bc_42	Mullus barbatus	frozen	2019-07-07	10	38.1059	12.9923	103	NOT AVAILABLE	145	29.5	M	2b	Library3	ACGTA	GAGATGT
10bc_44	Mullus barbatus	frozen	2019-07-07	10	38.1059	12.9923	103	NOT AVAILABLE	155	35.5	M	2b	Library3	CAGTCAC	CGATC
10bc_45	Mullus barbatus	frozen	2019-07-07	10	38.1059	12.9923	103	NOT AVAILABLE	175	50	F	2b	Library3	AGAGT	CATCTGT
10bc_46	Mullus barbatus	frozen	2019-07-07	10	38.1059	12.9923	103	NOT AVAILABLE	185	57.5	F	2c	Library3	GCTAACA	CTGGT
10bc_47	Mullus barbatus	frozen	2019-07-07	10	38.1059	12.9923	103	NOT AVAILABLE	180	60.5	M	3	Library3	ATGCT	GTCAAGT
10bc_48	Mullus barbatus	frozen	2019-07-07	10	38.1059	12.9923	103	NOT AVAILABLE	200	81	F	2c	Library3	ACACGAG	GAAGC
10bc_49	Mullus barbatus	frozen	2019-07-07	10	38.1059	12.9923	103	NOT AVAILABLE	215	103	F	3	Library3	GACTA	ATACGGT
10bc_50	Mullus barbatus	frozen	2019-07-07	10	38.1059	12.9923	103	NOT AVAILABLE	215	149.5	F	3	Library3	AGGACAC	TAGCA
10bc_51	Mullus barbatus	frozen	2019-07-07	10	38.1059	12.9923	103	NOT AVAILABLE	190	65	F	3	Library3	TCAGA	AGTCA
10bc_52	Mullus barbatus	frozen	2019-07-07	10	38.1059	12.9923	103	NOT AVAILABLE	190	46	F	3	Library3	TGCAACA	TACGTGT
10bc_53	Mullus barbatus	frozen	2019-07-07	10	38.1059	12.9923	103	NOT AVAILABLE	170	43.5	F	3	Library3	GATCG	GCATA
10bc_57	Mullus barbatus	frozen	2019-07-07	10	38.1059	12.9923	103	NOT AVAILABLE	150	80	F	3	Library3	CGTATCA	GAGATGT
11ab_01	Mullus barbatus	frozen	2019-06-04	11	39.3367	9.62778	35	NOT AVAILABLE	171	58.2	F	3	Library5	TGCAACA	TACGTGT
11ab_02	Mullus barbatus	frozen	2019-06-04	11	39.3367	9.62778	35	NOT AVAILABLE	171	57	F	3	Library5	GATCG	GCATA
11ab_03	Mullus barbatus	frozen	2019-06-04	11	39.3367	9.62778	35	NOT AVAILABLE	177	62.8	F	3	Library5	CGTATCA	GAGATGT
11ab_04	Mullus barbatus	frozen	2019-06-04	11	39.3367	9.62778	35	NOT AVAILABLE	170	56.9	F	3	Library5	CATGA	CGATC
11ab_05	Mullus barbatus	frozen	2019-06-04	11	39.3367	9.62778	35	NOT AVAILABLE	150	36.3	F	3	Library5	CACAGAC	CATCTGT
11ab_06	Mullus barbatus	frozen	2019-06-04	11	39.3367	9.62778	35	NOT AVAILABLE	164	52.6	F	3	Library5	ATCGA	CTGGT
11ab_07	Mullus barbatus	frozen	2019-06-04	11	39.3367	9.62778	35	NOT AVAILABLE	172	67.1	F	3	Library5	ACTGCAC	GTCAAGT
11ab_08	Mullus barbatus	frozen	2019-06-04	11	39.3367	9.62778	35	NOT AVAILABLE	175	49.9	F	3	Library5	TCGAG	GAAGC
11ab_09	Mullus barbatus	frozen	2019-06-04	11	39.3367	9.62778	35	NOT AVAILABLE	170	68.5	F	3	Library5	TCTCTCA	ATACGGT
11ab_10	Mullus barbatus	frozen	2019-06-04	11	39.3367	9.62778	35	NOT AVAILABLE	173	66.8	F	3	Library5	GTCAC	TAGCA
11ab_12	Mullus barbatus	frozen	2019-06-04	11	39.3367	9.62778	35	NOT AVAILABLE	155	44.8	F	3	Library5	GTACACA	AGCTGTC
11ab_13	Mullus barbatus	frozen	2019-06-04	11	39.3367	9.62778	35	NOT AVAILABLE	143	33.8	F	3	Library5	GCATT	AGTCA
11ab_14	Mullus barbatus	frozen	2019-06-04	11	39.3367	9.62778	35	NOT AVAILABLE	155	44.1	F	3	Library5	CTCTTCA	TACGTGT
11ab_15	Mullus barbatus	frozen	2019-06-04	11	39.3367	9.62778	35	NOT AVAILABLE	165	55.7	F	3	Library5	CGATA	GCATA
11ab_16	Mullus barbatus	frozen	2019-06-04	11	39.3367	9.62778	35	NOT AVAILABLE	158	44.5	F	3	Library5	CTAGGAC	GAGATGT
11ab_17	Mullus barbatus	frozen	2019-06-04	11	39.3367	9.62778	35	NOT AVAILABLE	185	74.6	F	3	Library5	ACGTA	CGATC
11ab_19	Mullus barbatus	frozen	2019-06-04	11	39.3367	9.62778	35	NOT AVAILABLE	165	53.3	F	3	Library5	CAGTCAC	CATCTGT
11ab_20	Mullus barbatus	frozen	2019-06-04	11	39.3367	9.62778	35	NOT AVAILABLE	150	47	F	3	Library5	AGAGT	CTGGT
11ab_21	Mullus barbatus	frozen	2019-06-04	11	39.3367	9.62778	35	NOT AVAILABLE	157	44.4	F	3	Library5	GCTAACA	GTCAAGT
11ab_23	Mullus barbatus	frozen	2019-06-04	11	39.3367	9.62778	35	NOT AVAILABLE	163	56.8	F	3	Library5	ATGCT	GAAGC
11ab_24	Mullus barbatus	frozen	2019-06-04	11	39.3367	9.62778	35	NOT AVAILABLE	188	81.3	F	3	Library5	ACACGAG	ATACGGT
11ab_25	Mullus barbatus	frozen	2019-06-04	11	39.3367	9.62778	35	NOT AVAILABLE	144	31.6	F	3	Library5	GACTA	TAGCA
11ab_26	Mullus barbatus	frozen	2019-06-04	11	39.3367	9.62778	35	NOT AVAILABLE	162	50.7	F	3	Library5	AGGACAC	AGCTGTC
11ab_27	Mullus barbatus	frozen	2019-06-04	11	39.3367	9.62778	35	NOT AVAILABLE	164	48.4	F	3	Library5	TCAGA	TACGTGT
11ab_28	Mullus barbatus	frozen	2019-06-04	11	39.3367	9.62778	35	NOT AVAILABLE	147	39.7	F	3	Library5	TGCAACA	GCATA
11ab_29	Mullus barbatus	frozen	2019-06-04	11	39.3367	9.62778	35	NOT AVAILABLE	147	36.2	F	3	Library5	GATCG	GAGATGT
11ab_31	Mullus barbatus	frozen	2019-06-04	11	39.3367	9.62778	35	NOT AVAILABLE	152	34.1	M	3	Library5	CGTATCA	CGATC
11ab_32	Mullus barbatus	frozen	2019-06-04	11	39.3367	9.62778	35	NOT AVAILABLE	170	45.3	M	3	Library5	CATGA	CATCTGT
11ab_33	Mullus barbatus	frozen	2019-06-04	11	39.3367	9.62778	35	NOT AVAILABLE	358	27.8	M	3	Library5	CACAGAC	CTGGT
11ab_34	Mullus barbatus	frozen	2019-06-04	11	39.3367	9.62778	35	NOT AVAILABLE	181	67.4	M	3	Library5	ATCGA	GTCAAGT
11ab_35	Mullus barbatus	frozen	2019-06-04	11	39.3367	9.62778	35	NOT AVAILABLE	142	28.7	M	3	Library5	ACTGCAC	GAAGC
11ab_36	Mullus barbatus	frozen	2019-06-04	11	39.3367	9.62778	35	NOT AVAILABLE	161	44.4	M	3	Library5	TCGAG	ATACGGT
11ab_37	Mullus barbatus	frozen	2019-06-04	11	39.3367	9.62778	35	NOT AVAILABLE	137	30.3	M	3	Library5	TCTCTCA	TAGCA
11ab_38	Mullus barbatus	frozen	2019-06-04	11	39.3367	9.62778	35	NOT AVAILABLE	135	23.9	M	3	Library5	GTCAC	AGCTGTC
11ab_39	Mullus barbatus	frozen	2019-06-04	11	39.3367	9.62778	35	NOT AVAILABLE	140	29.5	M	3	Library5	GTACACA	AGTCA
11ab_41	Mullus barbatus	frozen	2019-06-04	11	39.3367	9.62778	35	NOT AVAILABLE	152	36.3	M	3	Library5	GCATT	TACGTGT
11ab_42	Mullus barbatus	frozen	2019-06-04	11	39.3367	9.62778	35	NOT AVAILABLE	135	24.6	M	3	Library5	CTCTTCA	GCATA
11ab_44	Mullus barbatus	frozen	2019-06-04	11	39.3367	9.62778	35	NOT AVAILABLE	124	18.8	M	3	Library5	CGATA	GAGATGT
11ab_46	Mullus barbatus	frozen	2019-06-04	11	39.3367	9.62778	35	NOT AVAILABLE	131	20.9	M	3	Library5	CTAGGAC	CGATC
11ab_47	Mullus barbatus	frozen	2019-06-04	11	39.3367	9.62778	35	NOT AVAILABLE	139	26.6	M	3	Library5	AGGACAC	CTGGT
11ab_48	Mullus barbatus	frozen	2019-06-04	11	39.3367	9.62778	35	NOT AVAILABLE	122	19.3	M	3	Library5	TCAGA	GAAGC
11ab_49	Mullus barbatus	frozen	2019-06-04	11	39.3367	9.62778	35	NOT AVAILABLE	142	29.9	M	3	Library5	TGCAACA	ATACGGT
11ab_50	Mullus barbatus	frozen	2019-06-04	11	39.3367	9.62778	35	NOT AVAILABLE	125	20.1	M	3	Library5	GATCG	TAGCA
11c_1	Mullus barbatus	frozen	2019-06-20	11	39.2031	8.03667	180	NOT AVAILABLE	224	129.4	F	3	Library1	GATCG	GCATA
11c_10	Mullus barbatus	frozen	2019-06-20	11	39.2031	8.03667	180	NOT AVAILABLE	190	87.2	F	3	Library1	GTCAC	TAGCA
11c_11	Mullus barbatus	frozen	2019-06-20	11	39.2031	8.03667	180	NOT AVAILABLE	190	66.7	F	3	Library1	GTACACA	AGCTGTC
11c_12	Mullus barbatus	frozen	2019-06-20	11	39.2031	8.03667	180	NOT AVAILABLE	162	49.4	F	3	Library1	GCATT	AGTCA
11c_13	Mullus barbatus	frozen	2019-06-20	11	39.2031	8.03667	180	NOT AVAILABLE	182	66.7	F	3	Library1	CTCTTCA	TACGTGT
11c_14	Mullus barbatus	frozen	2019-06-20	11	39.2031	8.03667	180	NOT AVAILABLE	151	39.1	F	3	Library1	CGATA	GCATA
11c_16	Mullus barbatus	frozen	2019-06-20	11	39.2031	8.03667	180	NOT AVAILABLE	145	29.7	F	3	Library1	CTAGGAC	GAGATGT
11c_17	Mullus barbatus	frozen	2019-06-20	11	39.2031	8.03667	180	NOT AVAILABLE	125	20.2	F	3	Library1	ACGTA	CGATC
11c_20	Mullus barbatus	frozen	2019-06-20	11	39.2031	8.03667	180	NOT AVAILABLE	164	47.1	M	3	Library1	CAGTCAC	CATCTGT
11c_21	Mullus barbatus	frozen	2019-06-20	11	39.2031	8.03667	180	NOT AVAILABLE	157	39.8	M	3	Library1	AGAGT	CTGGT
11c_22	Mullus barbatus	frozen	2019-06-20	11	39.2031	8.03667	180	NOT AVAILABLE	162	37.4	M	3	Library1	GCTAACA	GTCAAGT
11c_23	Mullus barbatus	frozen	2019-06-20	11	39.2031	8.03667	180	NOT AVAILABLE	163	43.3	M	3	Library1	ATGCT	GAAGC
11c_24	Mullus barbatus	frozen	2019-06-20	11	39.2031	8.03667	180	NOT AVAILABLE	168	54.4	M	3	Library1	ACACGAG	ATACGGT
11c_25	Mullus barbatus	frozen	2019-06-20	11	39.2031	8.03667	180	NOT AVAILABLE	173	49.9	M	3	Library1	GACTA	TAGCA
11c_26	Mullus barbatus	frozen	2019-06-20	11	39.2031	8.03667	180	NOT AVAILABLE	189	71.5	M	3	Library1	AGGACAC	AGCTGTC
11c_27	Mullus barbatus	frozen	2019-06-20	11	39.2031	8.03667	180	NOT AVAILABLE	180	67.1	M	3	Library1	TCAGA	TACGTGT
11c_28	Mullus barbatus	frozen	2019-06-20	11	39.2031	8.03667	180	NOT AVAILABLE	173	50.3	M	3	Library1	TGCAACA	GCATA
11c_29	Mullus barbatus	frozen	2019-06-20	11	39.2031	8.03667	180	NOT AVAILABLE	170	51.1	M	3	Library1	GATCG	GAGATGT
11c_3	Mullus barbatus	frozen	2019-06-20	11	39.2031	8.03667	180	NOT AVAILABLE	189	62	F	3	Library1	CGTATCA	GAGATGT
11c_30	Mullus barbatus	frozen	2019-06-20	11	39.2031	8.03667	180	NOT AVAILABLE	170	54.9	M	3	Library1	CGTATCA	CGATC
11c_31	Mullus barbatus	frozen	2019-06-20	11	39.2031	8.03667	180	NOT AVAILABLE	150	34.1	M	3	Library1	CATGA	CATCTGT
11c_32	Mullus barbatus	frozen	2019-06-20	11	39.2031	8.03667	180	NOT AVAILABLE	167	48.6	M	3	Library1	CACAGAC	CTGGT
11c_33	Mullus barbatus	frozen	2019-06-20	11	39.2031	8.03667	180	NOT AVAILABLE	159	39.3	M	3	Library1	ATCGA	GTCAAGT
11c_34	Mullus barbatus	frozen	2019-06-20	11	39.2031	8.03667	180	NOT AVAILABLE	156	36.8	M	3	Library1	ACTGCAC	GAAGC
11c_35	Mullus barbatus	frozen	2019-06-20	11	39.2031	8.03667	180	NOT AVAILABLE	144	27.6	M	3	Library1	TCGAG	ATACGGT
11c_36	Mullus barbatus	frozen	2019-06-20	11	39.2031	8.03667	180	NOT AVAILABLE	153	35.4	M	3	Library1	TCTCTCA	TAGCA
11c_37	Mullus barbatus	frozen	2019-06-20	11	39.2031	8.03667	180	NOT AVAILABLE	141	28.1	M	3	Library1	GTCAC	AGCTGTC
11c_38	Mullus barbatus	frozen	2019-06-20	11	39.2031	8.03667	180	NOT AVAILABLE	148	37.7	M	3	Library1	GTACACA	AGTCA
11c_39	Mullus barbatus	frozen	2019-06-20	11	39.3622	8.11556	180	NOT AVAILABLE	183	59.3	F	3	Library1	GCATT	TACGTGT
11c_4	Mullus barbatus	frozen	2019-06-20	11	39.2031	8.03667	180	NOT AVAILABLE	202	80.5	F	3	Library1	CATGA	CGATC
11c_40	Mullus barbatus	frozen	2019-06-20	11	39.3622	8.11556	180	NOT AVAILABLE	201	91.6	F	3	Library1	CTCTTCA	GCATA
11c_41	Mullus barbatus	frozen	2019-06-20	11	39.3622	8.11556	180	NOT AVAILABLE	209	92.4	F	3	Library1	CGATA	GAGATGT
11c_42	Mullus barbatus	frozen	2019-06-20	11	39.3622	8.11556	180	NOT AVAILABLE	189	78	F	3	Library1	CTAGGAC	CGATC
11c_43	Mullus barbatus	frozen	2019-06-20	11	39.3622	8.11556	180	NOT AVAILABLE	215	114.1	F	3	Library1	ACGTA	CATCTGT
11c_44	Mullus barbatus	frozen	2019-06-20	11	39.3622	8.11556	180	NOT AVAILABLE	202	100.8	F	3	Library1	CAGTCAC	CTGGT
11c_45	Mullus barbatus	frozen	2019-06-20	11	39.3622	8.11556	180	NOT AVAILABLE	191	75.4	F	3	Library1	AGAGT	GTCAAGT
11c_46	Mullus barbatus	frozen	2019-06-20	11	39.3622	8.11556	180	NOT AVAILABLE	206	90.4	F	3	Library1	GCTAACA	GAAGC
11c_47	Mullus barbatus	frozen	2019-06-20	11	39.3622	8.11556	180	NOT AVAILABLE	185	76.1	F	3	Library1	ATGCT	ATACGGT
11c_48	Mullus barbatus	frozen	2019-06-20	11	39.3622	8.11556	180	NOT AVAILABLE	167	50.8	F	3	Library1	ACACGAG	TAGCA
11c_49	Mullus barbatus	frozen	2019-06-20	11	39.3622	8.11556	180	NOT AVAILABLE	174	53.1	F	3	Library1	GACTA	AGCTGTC
11c_5	Mullus barbatus	frozen	2019-06-20	11	39.2031	8.03667	180	NOT AVAILABLE	220	119.6	F	3	Library1	CACAGAC	CATCTGT
11c_50	Mullus barbatus	frozen	2019-06-20	11	39.3622	8.11556	180	NOT AVAILABLE	201	85.2	F	3	Library1	AGGACAC	AGTCA
11c_6	Mullus barbatus	frozen	2019-06-20	11	39.2031	8.03667	180	NOT AVAILABLE	181	63.3	F	3	Library1	ATCGA	CTGGT
11c_7	Mullus barbatus	frozen	2019-06-20	11	39.2031	8.03667	180	NOT AVAILABLE	222	122	F	3	Library1	ACTGCAC	GTCAAGT
11c_8	Mullus barbatus	frozen	2019-06-20	11	39.2031	8.03667	180	NOT AVAILABLE	212	99.4	F	3	Library1	TCGAG	GAAGC
11c_9	Mullus barbatus	frozen	2019-06-20	11	39.2031	8.03667	180	NOT AVAILABLE	173	55.4	F	3	Library1	TCTCTCA	ATACGGT
12a_01	Mullus barbatus	fresh	2019-09-24	12	36.7653	10.375	12	NOT AVAILABLE	190	64.02	M	1	Library3	CATGA	CGATC
12a_02	Mullus barbatus	fresh	2019-09-24	12	36.7653	10.375	12	NOT AVAILABLE	185	73.38	M	1	Library3	CACAGAC	CATCTGT
12a_03	Mullus barbatus	fresh	2019-09-24	12	36.7653	10.375	12	NOT AVAILABLE	187	69.89	F	1	Library3	ATCGA	CTGGT
12a_04	Mullus barbatus	fresh	2019-09-24	12	36.7653	10.375	12	NOT AVAILABLE	172	62.46	F	1	Library3	ACTGCAC	GTCAAGT
12a_05	Mullus barbatus	fresh	2019-09-24	12	36.7653	10.375	12	NOT AVAILABLE	176	67.26	F	1	Library3	TCGAG	GAAGC
12a_06	Mullus barbatus	fresh	2019-09-24	12	36.7653	10.375	12	NOT AVAILABLE	172	57.4	F	1	Library3	TCTCTCA	ATACGGT
12a_07	Mullus barbatus	fresh	2019-09-24	12	36.7653	10.375	12	NOT AVAILABLE	176	58.65	M	1	Library3	GTCAC	TAGCA
12a_08	Mullus barbatus	fresh	2019-09-24	12	36.7653	10.375	12	NOT AVAILABLE	165	51.99	M	1	Library3	GTACACA	AGCTGTC
12a_09	Mullus barbatus	fresh	2019-09-24	12	36.7653	10.375	12	NOT AVAILABLE	174	58.42	F	1	Library3	GCATT	AGTCA
12a_10	Mullus barbatus	fresh	2019-09-24	12	36.7653	10.375	12	NOT AVAILABLE	170	49.78	F	1	Library3	CTCTTCA	TACGTGT
12a_11	Mullus barbatus	fresh	2019-09-24	12	36.7653	10.375	12	NOT AVAILABLE	174	52.15	F	1	Library3	CGATA	GCATA
12a_12	Mullus barbatus	fresh	2019-09-24	12	36.7653	10.375	12	NOT AVAILABLE	165	49.09	F	1	Library3	CTAGGAC	GAGATGT
12a_13	Mullus barbatus	fresh	2019-09-24	12	36.7653	10.375	12	NOT AVAILABLE	160	44.95	F	1	Library3	ACGTA	CGATC
12a_14	Mullus barbatus	fresh	2019-09-24	12	36.7653	10.375	12	NOT AVAILABLE	172	56.26	F	1	Library3	CAGTCAC	CATCTGT
12a_15	Mullus barbatus	fresh	2019-09-24	12	36.7653	10.375	12	NOT AVAILABLE	168	53.4	F	1	Library3	AGAGT	CTGGT
12a_16	Mullus barbatus	fresh	2019-09-24	12	36.7653	10.375	12	NOT AVAILABLE	133	24.62	M	1	Library3	GCTAACA	GTCAAGT
12a_17	Mullus barbatus	fresh	2019-09-24	12	36.7653	10.375	12	NOT AVAILABLE	145	32.86	M	1	Library3	ATGCT	GAAGC
12a_18	Mullus barbatus	fresh	2019-09-24	12	36.7653	10.375	12	NOT AVAILABLE	155	41.51	F	1	Library3	ACACGAG	ATACGGT
12a_19	Mullus barbatus	fresh	2019-09-24	12	36.7653	10.375	12	NOT AVAILABLE	167	54.55	F	1	Library3	GACTA	TAGCA
12a_20	Mullus barbatus	fresh	2019-09-24	12	36.7653	10.375	12	NOT AVAILABLE	151	36.19	F	1	Library3	AGGACAC	AGCTGTC
12a_21	Mullus barbatus	fresh	2019-09-24	12	36.7653	10.375	12	NOT AVAILABLE	155	33.73	M	1	Library3	TCAGA	TACGTGT
12a_23	Mullus barbatus	fresh	2019-09-24	12	36.7653	10.375	12	NOT AVAILABLE	172	54.04	F	1	Library3	TGCAACA	GCATA
12a_24	Mullus barbatus	fresh	2019-09-24	12	36.7653	10.375	12	NOT AVAILABLE	137	26.33	M	1	Library3	GATCG	GAGATGT
12a_26	Mullus barbatus	fresh	2019-09-24	12	36.7653	10.375	12	NOT AVAILABLE	172	52.48	F	1	Library3	CGTATCA	CGATC
12a_27	Mullus barbatus	fresh	2019-09-24	12	36.7653	10.375	12	NOT AVAILABLE	151	37.35	M	1	Library3	CATGA	CATCTGT
12a_28	Mullus barbatus	fresh	2019-09-24	12	36.7653	10.375	12	NOT AVAILABLE	152	37.86	F	1	Library3	CACAGAC	CTGGT
12a_29	Mullus barbatus	fresh	2019-09-24	12	36.7653	10.375	12	NOT AVAILABLE	142	27.67	F	1	Library3	ATCGA	GTCAAGT
12a_30	Mullus barbatus	fresh	2019-09-24	12	36.7653	10.375	12	NOT AVAILABLE	138	25.14	F	1	Library3	ACTGCAC	GAAGC
12a_31	Mullus barbatus	fresh	2019-09-24	12	36.7653	10.375	12	NOT AVAILABLE	159	44.81	F	1	Library3	TCGAG	ATACGGT
12a_32	Mullus barbatus	fresh	2019-09-24	12	36.7653	10.375	12	NOT AVAILABLE	165	42.72	F	1	Library3	TCTCTCA	TAGCA
12a_33	Mullus barbatus	fresh	2019-09-24	12	36.7653	10.375	12	NOT AVAILABLE	175	57.18	F	1	Library3	GTCAC	AGCTGTC
12a_34	Mullus barbatus	fresh	2019-09-24	12	36.7653	10.375	12	NOT AVAILABLE	175	58.54	F	1	Library3	GTACACA	AGTCA
12a_35	Mullus barbatus	fresh	2019-09-24	12	36.7653	10.375	12	NOT AVAILABLE	150	33.23	F	1	Library3	GCATT	TACGTGT
12a_37	Mullus barbatus	fresh	2019-09-24	12	36.7653	10.375	12	NOT AVAILABLE	170	53.17	M	1	Library3	CTCTTCA	GCATA
12a_38	Mullus barbatus	fresh	2019-09-24	12	36.7653	10.375	12	NOT AVAILABLE	167	46.43	F	1	Library3	CGATA	GAGATGT
12a_39	Mullus barbatus	fresh	2019-09-24	12	36.7653	10.375	12	NOT AVAILABLE	164	47.23	F	1	Library3	CTAGGAC	CGATC
12a_40	Mullus barbatus	fresh	2019-09-24	12	36.7653	10.375	12	NOT AVAILABLE	180	55.17	F	1	Library3	ACGTA	CATCTGT
12a_41	Mullus barbatus	fresh	2019-09-24	12	36.7653	10.375	12	NOT AVAILABLE	185	62.77	M	1	Library3	CAGTCAC	CTGGT
12a_42	Mullus barbatus	fresh	2019-09-24	12	36.7653	10.375	12	NOT AVAILABLE	182	66.95	F	1	Library3	AGAGT	GTCAAGT
12a_43	Mullus barbatus	fresh	2019-09-24	12	36.7653	10.375	12	NOT AVAILABLE	165	47.43	F	1	Library3	GCTAACA	GAAGC
12a_44	Mullus barbatus	fresh	2019-09-24	12	36.7653	10.375	12	NOT AVAILABLE	135	25.93	F	1	Library3	ATGCT	ATACGGT
12a_45	Mullus barbatus	fresh	2019-09-24	12	36.7653	10.375	12	NOT AVAILABLE	171	55.07	F	1	Library3	ACACGAG	TAGCA
12a_46	Mullus barbatus	fresh	2019-09-24	12	36.7653	10.375	12	NOT AVAILABLE	174	59.11	F	1	Library3	GACTA	AGCTGTC
12a_48	Mullus barbatus	fresh	2019-09-24	12	36.7653	10.375	12	NOT AVAILABLE	171	51	M	1	Library3	AGGACAC	AGTCA
12a_49	Mullus barbatus	fresh	9/24/2019	12	36.7653	10.375	12	NOT AVAILABLE	180	64.26	F	1	Library3	GATCG	TAGCA
12a_50	Mullus barbatus	fresh	9/24/2019	12	36.7653	10.375	12	NOT AVAILABLE	167	50.15	F	1	Library3	CGTATCA	AGCTGTC
12m_01	Mullus barbatus	fresh	2019-09-24	12	37.1489	10.1823	200	NOT AVAILABLE	159	43.5	F	NOT AVAILABLE	Library2	TCAGA	AGTCA
12m_02	Mullus barbatus	fresh	2019-09-24	12	37.1489	10.1823	200	NOT AVAILABLE	164	45.8	F	NOT AVAILABLE	Library2	TGCAACA	TACGTGT
12m_03	Mullus barbatus	fresh	2019-09-24	12	37.1489	10.1823	200	NOT AVAILABLE	160	45.8	F	NOT AVAILABLE	Library2	GATCG	GCATA
12m_04	Mullus barbatus	fresh	2019-09-24	12	37.1489	10.1823	200	NOT AVAILABLE	149	35.7	F	NOT AVAILABLE	Library2	CGTATCA	GAGATGT
12m_05	Mullus barbatus	fresh	2019-09-24	12	37.1489	10.1823	200	NOT AVAILABLE	142	32.1	M	NOT AVAILABLE	Library2	CATGA	CGATC
12m_07	Mullus barbatus	fresh	2019-09-24	12	37.1489	10.1823	200	NOT AVAILABLE	157	40.6	F	NOT AVAILABLE	Library2	CACAGAC	CATCTGT
12m_08	Mullus barbatus	fresh	2019-09-24	12	37.1489	10.1823	200	NOT AVAILABLE	158	47.3	F	NOT AVAILABLE	Library2	ATCGA	CTGGT
12m_09	Mullus barbatus	fresh	2019-09-24	12	37.1489	10.1823	200	NOT AVAILABLE	164	45.6	F	NOT AVAILABLE	Library2	ACTGCAC	GTCAAGT
12m_10	Mullus barbatus	fresh	2019-09-24	12	37.1489	10.1823	200	NOT AVAILABLE	147	37.8	F	NOT AVAILABLE	Library2	TCGAG	GAAGC
12m_11	Mullus barbatus	fresh	2019-09-24	12	37.1489	10.1823	200	NOT AVAILABLE	157	36.6	F	NOT AVAILABLE	Library2	TCTCTCA	ATACGGT
12m_12	Mullus barbatus	fresh	2019-09-24	12	37.1489	10.1823	200	NOT AVAILABLE	155	40.2	F	NOT AVAILABLE	Library2	GTCAC	TAGCA
12m_13	Mullus barbatus	fresh	2019-09-24	12	37.1489	10.1823	200	NOT AVAILABLE	161	46.1	F	NOT AVAILABLE	Library2	GTACACA	AGCTGTC
12m_14	Mullus barbatus	fresh	2019-09-24	12	37.1489	10.1823	200	NOT AVAILABLE	152	36.9	F	NOT AVAILABLE	Library2	GCATT	AGTCA
12m_15	Mullus barbatus	fresh	2019-09-24	12	37.1489	10.1823	200	NOT AVAILABLE	147	34.1	M	NOT AVAILABLE	Library2	CTCTTCA	TACGTGT
12m_16	Mullus barbatus	fresh	2019-09-24	12	37.1489	10.1823	200	NOT AVAILABLE	174	56.9	F	NOT AVAILABLE	Library2	CGATA	GCATA
12m_17	Mullus barbatus	fresh	2019-09-24	12	37.1489	10.1823	200	NOT AVAILABLE	148	35.3	F	NOT AVAILABLE	Library2	CTAGGAC	GAGATGT
12m_18	Mullus barbatus	fresh	2019-09-24	12	37.1489	10.1823	200	NOT AVAILABLE	159	46.6	F	NOT AVAILABLE	Library2	ACGTA	CGATC
12m_19	Mullus barbatus	frozen	2019-09-24	12	37.1489	10.1823	200	NOT AVAILABLE	154	39.8	F	NOT AVAILABLE	Library2	CAGTCAC	CATCTGT
12m_20	Mullus barbatus	frozen	2019-09-24	12	37.1489	10.1823	200	NOT AVAILABLE	159	42.2	F	NOT AVAILABLE	Library2	AGAGT	CTGGT
12m_21	Mullus barbatus	frozen	2019-09-24	12	37.1489	10.1823	200	NOT AVAILABLE	153	44.2	F	NOT AVAILABLE	Library2	GCTAACA	GTCAAGT
12m_22	Mullus barbatus	frozen	2019-09-24	12	37.1489	10.1823	200	NOT AVAILABLE	154	40.3	F	NOT AVAILABLE	Library2	ATGCT	GAAGC
12m_23	Mullus barbatus	frozen	2019-09-24	12	37.1489	10.1823	200	NOT AVAILABLE	158	49	F	NOT AVAILABLE	Library2	ACACGAG	ATACGGT
12m_24	Mullus barbatus	frozen	2019-09-24	12	37.1489	10.1823	200	NOT AVAILABLE	164	46.1	F	NOT AVAILABLE	Library2	GACTA	TAGCA
12m_25	Mullus barbatus	frozen	2019-09-24	12	37.1489	10.1823	200	NOT AVAILABLE	152	44.1	F	NOT AVAILABLE	Library2	AGGACAC	AGCTGTC
12m_26	Mullus barbatus	frozen	2019-09-24	12	37.1489	10.1823	200	NOT AVAILABLE	144	31.1	F	NOT AVAILABLE	Library2	TCAGA	TACGTGT
12m_27	Mullus barbatus	frozen	2019-09-24	12	37.1489	10.1823	200	NOT AVAILABLE	144	39.5	F	NOT AVAILABLE	Library2	TGCAACA	GCATA
12m_28	Mullus barbatus	frozen	2019-09-24	12	37.1489	10.1823	200	NOT AVAILABLE	143	30.1	M	NOT AVAILABLE	Library2	GATCG	GAGATGT
12m_29	Mullus barbatus	frozen	2019-09-24	12	37.1489	10.1823	200	NOT AVAILABLE	141	30	M	NOT AVAILABLE	Library2	CGTATCA	CGATC
12m_31	Mullus barbatus	frozen	2019-09-24	12	37.1489	10.1823	200	NOT AVAILABLE	150	39.6	F	NOT AVAILABLE	Library2	CATGA	CATCTGT
12m_32	Mullus barbatus	frozen	2019-09-24	12	37.1489	10.1823	200	NOT AVAILABLE	157	42.5	F	NOT AVAILABLE	Library2	CACAGAC	CTGGT
12m_33	Mullus barbatus	frozen	2019-09-24	12	37.1489	10.1823	200	NOT AVAILABLE	159	43	F	NOT AVAILABLE	Library2	ATCGA	GTCAAGT
12m_34	Mullus barbatus	frozen	2019-09-24	12	37.1489	10.1823	200	NOT AVAILABLE	151	34.6	M	NOT AVAILABLE	Library2	ACTGCAC	GAAGC
12m_35	Mullus barbatus	frozen	2019-09-24	12	37.1489	10.1823	200	NOT AVAILABLE	151	37.4	F	NOT AVAILABLE	Library2	TCGAG	ATACGGT
12m_36	Mullus barbatus	frozen	2019-09-24	12	37.1489	10.1823	200	NOT AVAILABLE	159	44.2	F	NOT AVAILABLE	Library2	TCTCTCA	TAGCA
12m_37	Mullus barbatus	frozen	2019-09-24	12	37.1489	10.1823	200	NOT AVAILABLE	153	38.1	F	NOT AVAILABLE	Library2	GTCAC	AGCTGTC
12m_38	Mullus barbatus	frozen	2019-09-24	12	37.1489	10.1823	200	NOT AVAILABLE	154	40.8	M	NOT AVAILABLE	Library2	GTACACA	AGTCA
12m_39	Mullus barbatus	frozen	2019-09-24	12	37.1489	10.1823	200	NOT AVAILABLE	145	34.4	M	NOT AVAILABLE	Library2	GCATT	TACGTGT
12m_40	Mullus barbatus	frozen	2019-09-24	12	37.1489	10.1823	200	NOT AVAILABLE	144	32.6	F	NOT AVAILABLE	Library2	CTCTTCA	GCATA
12m_41	Mullus barbatus	fresh	2019-10-03	12	37.1489	10.1823	200	NOT AVAILABLE	152	32.1	F	NOT AVAILABLE	Library2	CGATA	GAGATGT
12m_42	Mullus barbatus	fresh	2019-10-03	12	37.1489	10.1823	200	NOT AVAILABLE	142	27.7	F	NOT AVAILABLE	Library2	CTAGGAC	CGATC
12m_43	Mullus barbatus	fresh	2019-10-03	12	37.1489	10.1823	200	NOT AVAILABLE	153	37.7	M	NOT AVAILABLE	Library2	ACGTA	CATCTGT
12m_44	Mullus barbatus	fresh	2019-10-03	12	37.1489	10.1823	200	NOT AVAILABLE	160	44.5	F	NOT AVAILABLE	Library2	CAGTCAC	CTGGT
12m_45	Mullus barbatus	fresh	2019-10-03	12	37.1489	10.1823	200	NOT AVAILABLE	155	40.2	F	NOT AVAILABLE	Library2	AGAGT	GTCAAGT
12m_46	Mullus barbatus	fresh	2019-10-03	12	37.1489	10.1823	200	NOT AVAILABLE	151	37.9	F	NOT AVAILABLE	Library2	GCTAACA	GAAGC
12m_47	Mullus barbatus	fresh	2019-10-03	12	37.1489	10.1823	200	NOT AVAILABLE	164	49.8	F	NOT AVAILABLE	Library2	ATGCT	ATACGGT
12m_48	Mullus barbatus	fresh	2019-10-03	12	37.1489	10.1823	200	NOT AVAILABLE	164	49.9	F	NOT AVAILABLE	Library2	ACACGAG	TAGCA
12m_49	Mullus barbatus	fresh	2019-10-03	12	37.1489	10.1823	200	NOT AVAILABLE	155	43.3	F	NOT AVAILABLE	Library2	GACTA	AGCTGTC
12m_50	Mullus barbatus	frozen	2019-10-24	12	37.1489	10.1823	200	NOT AVAILABLE	149	37.6	M	NOT AVAILABLE	Library2	AGGACAC	AGTCA
14a_04	Mullus barbatus	frozen	NOT AVAILABLE	14	33.9667	11.4833	53	NOT AVAILABLE	143	35.04	M	1	Library5	TCAGA	GCATA
14a_06	Mullus barbatus	frozen	NOT AVAILABLE	14	33.9667	11.4833	53	NOT AVAILABLE	150	41.03	M	2	Library5	TGCAACA	GAGATGT
14a_08	Mullus barbatus	frozen	NOT AVAILABLE	14	33.9667	11.4833	53	NOT AVAILABLE	155	44.18	F	1	Library5	GATCG	CGATC
14a_10	Mullus barbatus	frozen	NOT AVAILABLE	14	33.9667	11.4833	53	NOT AVAILABLE	162	50.69	F	2	Library5	CGTATCA	CATCTGT
14a_11	Mullus barbatus	frozen	NOT AVAILABLE	14	33.9667	11.4833	53	NOT AVAILABLE	160	47.92	F	2	Library5	CATGA	CTGGT
14a_13	Mullus barbatus	frozen	NOT AVAILABLE	14	33.9667	11.4833	53	NOT AVAILABLE	148	35.72	F	1	Library5	CACAGAC	GTCAAGT
14a_16	Mullus barbatus	frozen	NOT AVAILABLE	14	33.9667	11.4833	53	NOT AVAILABLE	161	45.18	F	2	Library5	ATCGA	GAAGC
14a_18	Mullus barbatus	frozen	NOT AVAILABLE	14	33.9667	11.4833	53	NOT AVAILABLE	150	40.36	F	2	Library5	ACTGCAC	ATACGGT
14a_19	Mullus barbatus	frozen	NOT AVAILABLE	14	33.9667	11.4833	53	NOT AVAILABLE	150	44.88	M	2	Library5	TCGAG	TAGCA
14a_20	Mullus barbatus	frozen	NOT AVAILABLE	14	33.9667	11.4833	53	NOT AVAILABLE	156	45.57	M	2	Library5	TCTCTCA	AGCTGTC
14a_22	Mullus barbatus	frozen	NOT AVAILABLE	14	33.9667	11.4833	53	NOT AVAILABLE	161	50.55	F	2	Library5	GTCAC	AGTCA
14a_23	Mullus barbatus	frozen	NOT AVAILABLE	14	33.9667	11.4833	53	NOT AVAILABLE	151	38.88	F	2	Library5	GTACACA	TACGTGT
14a_24	Mullus barbatus	frozen	NOT AVAILABLE	14	33.9667	11.4833	53	NOT AVAILABLE	157	44.96	F	2	Library5	GCATT	GCATA
14a_25	Mullus barbatus	frozen	NOT AVAILABLE	14	33.9667	11.4833	53	NOT AVAILABLE	145	37.22	F	2	Library5	CTCTTCA	GAGATGT
14a_26	Mullus barbatus	frozen	NOT AVAILABLE	14	33.9667	11.4833	53	NOT AVAILABLE	157	47.64	F	1	Library5	CGATA	CGATC
14a_27	Mullus barbatus	frozen	NOT AVAILABLE	14	33.9667	11.4833	53	NOT AVAILABLE	144	35.14	F	1	Library5	CTAGGAC	CATCTGT
14a_28	Mullus barbatus	frozen	NOT AVAILABLE	14	33.9667	11.4833	53	NOT AVAILABLE	160	44.98	F	2	Library5	ACGTA	CTGGT
14a_30	Mullus barbatus	frozen	NOT AVAILABLE	14	33.9667	11.4833	53	NOT AVAILABLE	150	34.8	F	1	Library5	CAGTCAC	GTCAAGT
14a_31	Mullus barbatus	frozen	NOT AVAILABLE	14	33.9667	11.4833	53	NOT AVAILABLE	144	33.12	F	2	Library5	AGAGT	GAAGC
14a_37	Mullus barbatus	frozen	NOT AVAILABLE	14	33.9667	11.4833	53	NOT AVAILABLE	155	43.3	F	2	Library5	GCTAACA	ATACGGT
14a_38	Mullus barbatus	frozen	NOT AVAILABLE	14	33.9667	11.4833	53	NOT AVAILABLE	156	43.54	F	2	Library5	ATGCT	TAGCA
14a_40	Mullus barbatus	frozen	NOT AVAILABLE	14	33.9667	11.4833	53	NOT AVAILABLE	153	41.71	F	1	Library5	ACACGAG	AGCTGTC
14a_43	Mullus barbatus	frozen	NOT AVAILABLE	14	33.9667	11.4833	53	NOT AVAILABLE	157	45.79	F	2	Library5	GACTA	AGTCA
14a_44	Mullus barbatus	frozen	NOT AVAILABLE	14	33.9667	11.4833	53	NOT AVAILABLE	147	39.47	F	2	Library5	AGGACAC	TACGTGT
14a_45	Mullus barbatus	frozen	NOT AVAILABLE	14	33.9667	11.4833	53	NOT AVAILABLE	152	40.91	F	2	Library5	TCAGA	GAGATGT
14a_47	Mullus barbatus	frozen	NOT AVAILABLE	14	33.9667	11.4833	53	NOT AVAILABLE	162	48.46	F	1	Library5	TGCAACA	CGATC
14a_48	Mullus barbatus	frozen	NOT AVAILABLE	14	33.9667	11.4833	53	NOT AVAILABLE	145	34.5	F	1	Library5	GATCG	CATCTGT
14a_49	Mullus barbatus	frozen	NOT AVAILABLE	14	33.9667	11.4833	53	NOT AVAILABLE	155	39.5	F	2	Library5	CGTATCA	CTGGT
14a_50	Mullus barbatus	frozen	NOT AVAILABLE	14	33.9667	11.4833	53	NOT AVAILABLE	152	45.81	F	1	Library5	CATGA	GTCAAGT
17a_01	Mullus barbatus	fresh	2019-06-11	17	43.6917	13.5161	20	NOT AVAILABLE	125	17.5	M	4a	Library1	TCAGA	GCATA
17a_02	Mullus barbatus	fresh	2019-06-11	17	43.6917	13.5161	20	NOT AVAILABLE	145	23.2	M	4a	Library1	TGCAACA	GAGATGT
17a_03	Mullus barbatus	fresh	2019-06-11	17	43.6917	13.5161	20	NOT AVAILABLE	125	19.9	M	4a	Library1	GATCG	CGATC
17a_04	Mullus barbatus	fresh	2019-06-11	17	43.6917	13.5161	20	NOT AVAILABLE	125	18.6	M	4a	Library1	CGTATCA	CATCTGT
17a_05	Mullus barbatus	fresh	2019-06-11	17	43.6917	13.5161	20	NOT AVAILABLE	120	17	M	4a	Library1	CATGA	CTGGT
17a_06	Mullus barbatus	fresh	2019-06-11	17	43.6917	13.5161	20	NOT AVAILABLE	125	21.5	M	4a	Library1	CACAGAC	GTCAAGT
17a_07	Mullus barbatus	fresh	2019-06-11	17	43.6917	13.5161	20	NOT AVAILABLE	130	20.4	M	4a	Library1	ATCGA	GAAGC
17a_08	Mullus barbatus	fresh	2019-06-11	17	43.6917	13.5161	20	NOT AVAILABLE	125	16.7	M	4a	Library1	ACTGCAC	ATACGGT
17a_09	Mullus barbatus	fresh	2019-06-11	17	43.6917	13.5161	20	NOT AVAILABLE	125	20	M	4a	Library1	TCGAG	TAGCA
17a_10	Mullus barbatus	fresh	2019-06-11	17	43.6917	13.5161	20	NOT AVAILABLE	125	20.4	M	4a	Library1	TCTCTCA	AGCTGTC
17a_11	Mullus barbatus	fresh	2019-06-11	17	43.6917	13.5161	20	NOT AVAILABLE	125	18.7	M	4a	Library1	GTCAC	AGTCA
17a_12	Mullus barbatus	fresh	2019-06-11	17	43.5	14.5	70	NOT AVAILABLE	125	17.8	M	4a	Library1	GTACACA	TACGTGT
17a_13	Mullus barbatus	fresh	2019-06-11	17	43.5	14.5	70	NOT AVAILABLE	125	18.2	M	4a	Library1	GCATT	GCATA
17a_14	Mullus barbatus	fresh	2019-06-11	17	43.5	14.5	70	NOT AVAILABLE	130	20.1	M	4a	Library1	CTCTTCA	GAGATGT
17a_15	Mullus barbatus	fresh	2019-06-11	17	43.5	14.5	70	NOT AVAILABLE	130	21.7	M	4a	Library1	CGATA	CGATC
17a_16	Mullus barbatus	fresh	2019-06-11	17	43.5	14.5	70	NOT AVAILABLE	135	23.2	M	4a	Library1	CTAGGAC	CATCTGT
17a_17	Mullus barbatus	fresh	2019-06-11	17	43.5	14.5	70	NOT AVAILABLE	140	21	M	4a	Library1	ACGTA	CTGGT
17a_18	Mullus barbatus	fresh	2019-06-11	17	43.5	14.5	70	NOT AVAILABLE	130	19.2	M	4a	Library1	CAGTCAC	GTCAAGT
17a_19	Mullus barbatus	fresh	2019-06-11	17	43.5	14.5	70	NOT AVAILABLE	135	22.5	M	4a	Library1	AGAGT	GAAGC
17a_20	Mullus barbatus	fresh	2019-06-11	17	43.5	14.5	70	NOT AVAILABLE	140	24.3	M	4a	Library1	GCTAACA	ATACGGT
17a_21	Mullus barbatus	fresh	2019-06-11	17	43.5	14.5	70	NOT AVAILABLE	140	24.7	M	4a	Library1	ATGCT	TAGCA
17a_22	Mullus barbatus	fresh	2019-05-29	17	43.4667	14.8333	70	NOT AVAILABLE	160	44.5	F	3	Library1	ACACGAG	AGCTGTC
17a_23	Mullus barbatus	fresh	2019-05-29	17	43.4667	14.8333	70	NOT AVAILABLE	165	50.7	F	3	Library1	GACTA	AGTCA
17a_24	Mullus barbatus	fresh	2019-05-29	17	43.4667	14.8333	70	NOT AVAILABLE	165	48.3	F	3	Library1	AGGACAC	TACGTGT
17a_25	Mullus barbatus	fresh	2019-05-29	17	43.4667	14.8333	70	NOT AVAILABLE	170	48	F	3	Library1	TCAGA	GAGATGT
17a_26	Mullus barbatus	fresh	2019-05-29	17	43.4667	14.8333	70	NOT AVAILABLE	180	60.8	F	3	Library1	TGCAACA	CGATC
17a_27	Mullus barbatus	fresh	2019-05-29	17	43.4667	14.8333	70	NOT AVAILABLE	175	56.8	F	3	Library1	GATCG	CATCTGT
17a_28	Mullus barbatus	fresh	2019-05-29	17	43.4667	14.8333	70	NOT AVAILABLE	170	56.4	F	3	Library1	CGTATCA	CTGGT
17a_29	Mullus barbatus	fresh	2019-05-29	17	43.4667	14.8333	70	NOT AVAILABLE	170	53.9	F	3	Library1	CATGA	GTCAAGT
17a_30	Mullus barbatus	fresh	2019-05-29	17	43.4667	14.8333	70	NOT AVAILABLE	160	42.9	F	3	Library1	CACAGAC	GAAGC
17a_31	Mullus barbatus	fresh	2019-05-29	17	43.4667	14.8333	70	NOT AVAILABLE	160	40.6	M	4a	Library1	ATCGA	ATACGGT
17a_32	Mullus barbatus	fresh	2019-06-06	17	43.6736	14.5069	80	NOT AVAILABLE	160	39.1	M	4a	Library1	ACTGCAC	TAGCA
17a_33	Mullus barbatus	fresh	2019-06-06	17	43.6736	14.5069	80	NOT AVAILABLE	160	40	F	3	Library1	TCGAG	AGCTGTC
17a_34	Mullus barbatus	fresh	2019-06-06	17	43.6736	14.5069	80	NOT AVAILABLE	160	43.2	F	3	Library1	TCTCTCA	AGTCA
17a_35	Mullus barbatus	fresh	2019-06-06	17	43.6736	14.5069	80	NOT AVAILABLE	160	46.6	F	3	Library1	GTCAC	TACGTGT
17a_36	Mullus barbatus	fresh	2019-06-06	17	43.6736	14.5069	80	NOT AVAILABLE	160	43.5	F	3	Library1	GTACACA	GCATA
17a_37	Mullus barbatus	fresh	2019-06-06	17	43.6736	14.5069	80	NOT AVAILABLE	165	46.5	F	3	Library1	GCATT	GAGATGT
17a_38	Mullus barbatus	fresh	2019-06-06	17	43.6736	14.5069	80	NOT AVAILABLE	165	45.9	F	3	Library1	CTCTTCA	CGATC
17a_39	Mullus barbatus	fresh	2019-06-06	17	43.6736	14.5069	80	NOT AVAILABLE	160	51.2	F	3	Library1	CGATA	CATCTGT
17a_40	Mullus barbatus	fresh	2019-06-06	17	43.6736	14.5069	80	NOT AVAILABLE	160	40.1	F	3	Library1	CTAGGAC	CTGGT
17a_41	Mullus barbatus	fresh	2019-06-06	17	43.6736	14.5069	80	NOT AVAILABLE	165	43.2	F	3	Library1	ACGTA	GTCAAGT
17a_42	Mullus barbatus	fresh	2019-06-06	17	43.6736	14.5069	80	NOT AVAILABLE	190	79.4	F	3	Library1	CAGTCAC	GAAGC
17a_43	Mullus barbatus	fresh	2019-06-06	17	43.6736	14.5069	80	NOT AVAILABLE	200	86.6	F	3	Library1	AGAGT	ATACGGT
17a_44	Mullus barbatus	fresh	2019-06-06	17	43.6736	14.5069	80	NOT AVAILABLE	205	97.3	F	3	Library1	GCTAACA	TAGCA
17a_45	Mullus barbatus	fresh	2019-06-06	17	43.6736	14.5069	80	NOT AVAILABLE	200	81.2	F	3	Library1	ATGCT	AGCTGTC
17a_46	Mullus barbatus	fresh	2019-06-06	17	43.6736	14.5069	80	NOT AVAILABLE	170	52.1	F	3	Library1	ACACGAG	AGTCA
17a_47	Mullus barbatus	fresh	2019-06-06	17	43.6736	14.5069	80	NOT AVAILABLE	170	54.1	F	3	Library1	GACTA	TACGTGT
17a_48	Mullus barbatus	fresh	2019-06-06	17	43.6736	14.5069	80	NOT AVAILABLE	170	53.7	F	3	Library1	AGGACAC	GCATA
17a_49	Mullus barbatus	fresh	2019-06-06	17	43.6736	14.5069	80	NOT AVAILABLE	165	46.5	F	3	Library1	TCAGA	CGATC
17a_50	Mullus barbatus	fresh	2019-06-06	17	43.6736	14.5069	80	NOT AVAILABLE	190	80.5	F	3	Library1	TGCAACA	CATCTGT
17b_01	Mullus barbatus	fresh	2019-06-04	17	43	15	150	NOT AVAILABLE	175	57.7	F	3	Library1	GATCG	CTGGT
17b_02	Mullus barbatus	fresh	2019-06-04	17	43	15	150	NOT AVAILABLE	185	61.6	F	3	Library1	CGTATCA	GTCAAGT
17b_03	Mullus barbatus	fresh	2019-06-04	17	43	15	150	NOT AVAILABLE	180	61	F	3	Library1	CATGA	GAAGC
17b_04	Mullus barbatus	fresh	2019-06-04	17	43	15	150	NOT AVAILABLE	190	68.8	F	3	Library1	CACAGAC	ATACGGT
17b_05	Mullus barbatus	fresh	2019-06-04	17	43	15	150	NOT AVAILABLE	180	62.1	F	3	Library1	ATCGA	TAGCA
17b_06	Mullus barbatus	fresh	2019-06-04	17	43	15	150	NOT AVAILABLE	185	63.1	F	3	Library1	ACTGCAC	AGCTGTC
17b_07	Mullus barbatus	fresh	2019-06-04	17	43	15	150	NOT AVAILABLE	180	66.8	F	3	Library1	TCGAG	AGTCA
17b_08	Mullus barbatus	fresh	2019-06-04	17	43	15	150	NOT AVAILABLE	185	57.4	F	3	Library1	TCTCTCA	TACGTGT
17b_09	Mullus barbatus	fresh	2019-06-04	17	43	15	150	NOT AVAILABLE	195	70.8	F	4a	Library1	GTCAC	GCATA
17b_10	Mullus barbatus	fresh	2019-06-04	17	43	15	150	NOT AVAILABLE	175	57.1	F	3	Library1	GTACACA	GAGATGT
17b_11	Mullus barbatus	fresh	2019-06-04	17	43	15	150	NOT AVAILABLE	195	73.3	F	3	Library1	GCATT	CGATC
17b_12	Mullus barbatus	fresh	2019-06-04	17	43	15	150	NOT AVAILABLE	190	61.9	F	3	Library1	CTCTTCA	CATCTGT
17b_13	Mullus barbatus	fresh	2019-06-04	17	43	15	150	NOT AVAILABLE	185	70.5	F	3	Library1	CGATA	CTGGT
17b_14	Mullus barbatus	fresh	2019-06-04	17	43	15	150	NOT AVAILABLE	170	49.8	F	3	Library1	CTAGGAC	GTCAAGT
17b_15	Mullus barbatus	fresh	2019-06-04	17	43	15	150	NOT AVAILABLE	170	49.4	F	3	Library1	ACGTA	GAAGC
17b_16	Mullus barbatus	fresh	2019-06-04	17	43	15	150	NOT AVAILABLE	155	36.4	M	3	Library1	CAGTCAC	ATACGGT
17b_17	Mullus barbatus	fresh	2019-06-04	17	43	15	150	NOT AVAILABLE	190	68.6	F	3	Library1	AGAGT	TAGCA
17b_18	Mullus barbatus	fresh	2019-06-04	17	43	15	150	NOT AVAILABLE	170	46.1	F	3	Library1	GCTAACA	AGCTGTC
17b_19	Mullus barbatus	fresh	2019-06-04	17	43	15	150	NOT AVAILABLE	155	38.8	M	4a	Library1	ATGCT	AGTCA
17b_20	Mullus barbatus	fresh	2019-06-04	17	43	15	150	NOT AVAILABLE	185	66	F	3	Library1	ACACGAG	TACGTGT
17b_21	Mullus barbatus	fresh	2019-06-04	17	43	15	150	NOT AVAILABLE	190	68.3	F	3	Library1	GACTA	GCATA
17b_22	Mullus barbatus	fresh	2019-06-04	17	43	15	150	NOT AVAILABLE	185	66.3	F	3	Library1	AGGACAC	GAGATGT
17b_23	Mullus barbatus	fresh	2019-06-04	17	43	15	150	NOT AVAILABLE	180	66.4	F	3	Library1	TCAGA	CATCTGT
17b_24	Mullus barbatus	fresh	2019-06-04	17	43	15	150	NOT AVAILABLE	165	42.9	M	4a	Library1	TGCAACA	CTGGT
17b_25	Mullus barbatus	fresh	2019-06-04	17	43	15	150	NOT AVAILABLE	185	70.5	F	3	Library1	GATCG	GTCAAGT
17b_26	Mullus barbatus	fresh	2019-06-04	17	43	15	150	NOT AVAILABLE	165	44.1	M	3	Library1	CGTATCA	GAAGC
17b_27	Mullus barbatus	fresh	2019-06-04	17	43	15	150	NOT AVAILABLE	180	61	F	3	Library1	CATGA	ATACGGT
17b_28	Mullus barbatus	fresh	2019-06-04	17	43	15	150	NOT AVAILABLE	205	91.4	F	3	Library1	CACAGAC	TAGCA
17b_29	Mullus barbatus	fresh	2019-06-04	17	43	15	150	NOT AVAILABLE	190	71.8	F	3	Library1	ATCGA	AGCTGTC
17b_30	Mullus barbatus	fresh	2019-06-04	17	43	15	150	NOT AVAILABLE	185	73.1	F	3	Library1	ACTGCAC	AGTCA
17b_31	Mullus barbatus	fresh	2019-06-04	17	43	15	150	NOT AVAILABLE	195	74.5	F	3	Library1	TCGAG	TACGTGT
17b_32	Mullus barbatus	fresh	2019-06-04	17	43	15	150	NOT AVAILABLE	195	80.4	F	3	Library1	TCTCTCA	GCATA
17b_33	Mullus barbatus	fresh	2019-06-04	17	43	15	150	NOT AVAILABLE	220	111.4	F	3	Library1	GTCAC	GAGATGT
17b_34	Mullus barbatus	fresh	2019-06-04	17	43	15	150	NOT AVAILABLE	145	31.2	M	4a	Library1	GTACACA	CGATC
17b_35	Mullus barbatus	fresh	2019-06-04	17	43	15	150	NOT AVAILABLE	145	27.2	M	2c	Library1	GCATT	CATCTGT
17b_36	Mullus barbatus	fresh	2019-06-04	17	43	15	150	NOT AVAILABLE	145	29	M	2c	Library1	CTCTTCA	CTGGT
17b_37	Mullus barbatus	fresh	2019-06-04	17	43	15	150	NOT AVAILABLE	180	59.7	F	3	Library1	CGATA	GTCAAGT
17b_38	Mullus barbatus	fresh	2019-06-04	17	43	15	150	NOT AVAILABLE	170	49.1	F	3	Library1	CTAGGAC	GAAGC
17b_39	Mullus barbatus	fresh	2019-06-04	17	43	15	150	NOT AVAILABLE	150	31.8	M	4a	Library1	ACGTA	ATACGGT
17b_40	Mullus barbatus	fresh	2019-06-04	17	43	15	150	NOT AVAILABLE	155	39.4	M	4a	Library1	CAGTCAC	TAGCA
17b_41	Mullus barbatus	fresh	2019-06-04	17	43	15	150	NOT AVAILABLE	185	58.2	F	3	Library1	AGAGT	AGCTGTC
17b_42	Mullus barbatus	fresh	2019-06-04	17	43	15	150	NOT AVAILABLE	190	78.7	F	3	Library1	GCTAACA	AGTCA
17b_43	Mullus barbatus	fresh	2019-06-04	17	43	15	150	NOT AVAILABLE	165	50.4	M	2c	Library1	ATGCT	TACGTGT
17b_44	Mullus barbatus	fresh	2019-06-04	17	43	15	150	NOT AVAILABLE	175	59.7	F	3	Library1	ACACGAG	GCATA
17b_45	Mullus barbatus	fresh	2019-06-04	17	43	15	150	NOT AVAILABLE	175	55.3	F	3	Library1	GACTA	GAGATGT
17b_46	Mullus barbatus	fresh	2019-06-04	17	43	15	150	NOT AVAILABLE	180	58.7	F	3	Library1	AGGACAC	CGATC
17b_47	Mullus barbatus	fresh	2019-04-06	17	43	15	150	NOT AVAILABLE	190	69.5	F	3	Library1	GACTA	CATCTGT
17b_48	Mullus barbatus	fresh	2019-04-06	17	43	15	150	NOT AVAILABLE	180	55.6	F	3	Library1	AGGACAC	CTGGT
17b_49	Mullus barbatus	fresh	2019-04-06	17	43	15	150	NOT AVAILABLE	190	64.2	F	3	Library1	TCAGA	GAAGC
17b_50	Mullus barbatus	fresh	2019-04-06	17	43	15	150	NOT AVAILABLE	175	53	F	3	Library1	TGCAACA	ATACGGT
17c_01	Mullus barbatus	fresh	2019-07-05	17	42.9302	16.1669	122	NOT AVAILABLE	175	57	F	3	Library3	TCAGA	CTGGT
17c_02	Mullus barbatus	fresh	2019-07-05	17	42.9302	16.1669	122	NOT AVAILABLE	175	59	F	2b	Library3	TGCAACA	GTCAAGT
17c_03	Mullus barbatus	fresh	2019-07-05	17	42.9302	16.1669	122	NOT AVAILABLE	185	78	F	3	Library3	GATCG	GAAGC
17c_04	Mullus barbatus	fresh	2019-07-05	17	42.9302	16.1669	122	NOT AVAILABLE	165	55	F	2b	Library3	CGTATCA	ATACGGT
17c_05	Mullus barbatus	fresh	2019-07-05	17	42.9302	16.1669	122	NOT AVAILABLE	170	59	F	3	Library3	CATGA	TAGCA
17c_06	Mullus barbatus	fresh	2019-07-05	17	42.9302	16.1669	122	NOT AVAILABLE	145	41	M	3	Library3	CACAGAC	AGCTGTC
17c_07	Mullus barbatus	fresh	2019-07-05	17	42.9302	16.1669	122	NOT AVAILABLE	145	37	M	3	Library3	ATCGA	AGTCA
17c_08	Mullus barbatus	fresh	2019-07-05	17	42.9302	16.1669	122	NOT AVAILABLE	140	38	F	2b	Library3	ACTGCAC	TACGTGT
17c_09	Mullus barbatus	fresh	2019-07-05	17	42.9302	16.1669	122	NOT AVAILABLE	210	95	F	3	Library3	TCGAG	GCATA
17c_10	Mullus barbatus	fresh	2019-07-05	17	42.9302	16.1669	122	NOT AVAILABLE	150	42	F	2b	Library3	TCTCTCA	GAGATGT
17c_11	Mullus barbatus	fresh	2019-07-05	17	42.686	16.0452	173	NOT AVAILABLE	145	33	M	3	Library3	GTCAC	CGATC
17c_12	Mullus barbatus	fresh	2019-07-05	17	42.686	16.0452	173	NOT AVAILABLE	145	34	M	3	Library3	GTACACA	CATCTGT
17c_13	Mullus barbatus	fresh	2019-07-05	17	42.686	16.0452	173	NOT AVAILABLE	150	34	M	3	Library3	GCATT	CTGGT
17c_14	Mullus barbatus	fresh	2019-07-05	17	42.686	16.0452	173	NOT AVAILABLE	140	28	M	3	Library3	CTCTTCA	GTCAAGT
17c_15	Mullus barbatus	fresh	2019-07-05	17	42.686	16.0452	173	NOT AVAILABLE	150	30	M	3	Library3	CGATA	GAAGC
17c_16	Mullus barbatus	fresh	2019-07-06	17	42.9013	15.8018	134	NOT AVAILABLE	190	65	F	3	Library3	CTAGGAC	ATACGGT
17c_17	Mullus barbatus	fresh	2019-07-06	17	42.9013	15.8018	134	NOT AVAILABLE	195	70	F	3	Library3	ACGTA	TAGCA
17c_18	Mullus barbatus	fresh	2019-07-06	17	42.9013	15.8018	134	NOT AVAILABLE	185	59	F	2b	Library3	CAGTCAC	AGCTGTC
17c_19	Mullus barbatus	fresh	2019-07-06	17	42.9013	15.8018	134	NOT AVAILABLE	180	50	F	3	Library3	AGAGT	AGTCA
17c_20	Mullus barbatus	fresh	2019-07-06	17	42.9013	15.8018	134	NOT AVAILABLE	185	62	F	2c	Library3	GCTAACA	TACGTGT
17c_21	Mullus barbatus	fresh	2019-07-06	17	42.9013	15.8018	134	NOT AVAILABLE	175	49	F	3	Library3	ATGCT	GCATA
17c_22	Mullus barbatus	fresh	2019-07-06	17	42.9013	15.8018	134	NOT AVAILABLE	170	47	F	3	Library3	ACACGAG	GAGATGT
17c_23	Mullus barbatus	fresh	2019-07-06	17	42.9013	15.8018	134	NOT AVAILABLE	160	35	F	2b	Library3	GACTA	CGATC
17c_24	Mullus barbatus	fresh	2019-07-06	17	42.9013	15.8018	134	NOT AVAILABLE	165	47	F	3	Library3	AGGACAC	CATCTGT
17c_25	Mullus barbatus	fresh	2019-07-06	17	42.9013	15.8018	134	NOT AVAILABLE	170	41	F	2c	Library3	TCAGA	GTCAAGT
17c_26	Mullus barbatus	fresh	2019-07-06	17	42.9625	15.5827	153	NOT AVAILABLE	150	34	M	2b	Library3	TGCAACA	GAAGC
17c_27	Mullus barbatus	fresh	2019-07-06	17	42.9625	15.5827	153	NOT AVAILABLE	170	42	F	2b	Library3	GATCG	ATACGGT
17c_28	Mullus barbatus	fresh	2019-07-06	17	42.9625	15.5827	153	NOT AVAILABLE	200	72	F	2c	Library3	CGTATCA	TAGCA
17c_29	Mullus barbatus	fresh	2019-07-06	17	42.9625	15.5827	153	NOT AVAILABLE	175	50	F	2c	Library3	CATGA	AGCTGTC
17c_30	Mullus barbatus	fresh	2019-07-06	17	42.9625	15.5827	153	NOT AVAILABLE	180	54	F	3	Library3	CACAGAC	AGTCA
17c_31	Mullus barbatus	fresh	2019-07-06	17	42.9625	15.5827	153	NOT AVAILABLE	165	40	F	2b	Library3	ATCGA	TACGTGT
17c_32	Mullus barbatus	fresh	2019-07-06	17	42.9625	15.5827	153	NOT AVAILABLE	160	32	M	2b	Library3	ACTGCAC	GCATA
17c_33	Mullus barbatus	fresh	2019-07-06	17	42.9625	15.5827	153	NOT AVAILABLE	160	40	F	2b	Library3	TCGAG	GAGATGT
17c_34	Mullus barbatus	fresh	2019-07-06	17	42.9625	15.5827	153	NOT AVAILABLE	150	34	M	2b	Library3	TCTCTCA	CGATC
17c_35	Mullus barbatus	fresh	2019-07-06	17	42.9625	15.5827	153	NOT AVAILABLE	160	38	F	2c	Library3	GTCAC	CATCTGT
17c_36	Mullus barbatus	fresh	2019-07-07	17	43.1599	15.7401	132	NOT AVAILABLE	190	69	F	3	Library3	GTACACA	CTGGT
17c_37	Mullus barbatus	fresh	2019-07-07	17	43.1599	15.7401	132	NOT AVAILABLE	145	28	F	3	Library3	GCATT	GTCAAGT
17c_38	Mullus barbatus	fresh	2019-07-07	17	43.1599	15.7401	132	NOT AVAILABLE	140	26	M	3	Library3	CTCTTCA	GAAGC
17c_39	Mullus barbatus	fresh	2019-07-07	17	43.1599	15.7401	132	NOT AVAILABLE	205	89	F	3	Library3	CGATA	ATACGGT
17c_40	Mullus barbatus	fresh	2019-07-07	17	43.1599	15.7401	132	NOT AVAILABLE	145	34	F	3	Library3	CTAGGAC	TAGCA
17c_41	Mullus barbatus	fresh	2019-07-08	17	44.0134	14.8143	65	NOT AVAILABLE	165	45	F	2b	Library3	ACGTA	AGCTGTC
17c_42	Mullus barbatus	fresh	2019-07-08	17	44.0134	14.8143	65	NOT AVAILABLE	175	50	F	2b	Library3	CAGTCAC	AGTCA
17c_43	Mullus barbatus	fresh	2019-07-08	17	44.0134	14.8143	65	NOT AVAILABLE	175	54	F	2b	Library3	AGAGT	TACGTGT
17c_44	Mullus barbatus	fresh	2019-07-08	17	44.0134	14.8143	65	NOT AVAILABLE	160	37	F	2b	Library3	GCTAACA	GCATA
17c_45	Mullus barbatus	fresh	2019-07-08	17	44.0134	14.8143	65	NOT AVAILABLE	170	53	F	3	Library3	ATGCT	GAGATGT
17c_46	Mullus barbatus	fresh	2019-07-08	17	44.2292	14.6686	61	NOT AVAILABLE	140	30	F	2b	Library3	ACACGAG	CGATC
17c_47	Mullus barbatus	fresh	2019-07-08	17	44.2292	14.6686	61	NOT AVAILABLE	150	37	F	2b	Library3	GACTA	CATCTGT
17c_48	Mullus barbatus	fresh	2019-07-08	17	44.2292	14.6686	61	NOT AVAILABLE	160	48	F	2b	Library3	AGGACAC	CTGGT
17c_49	Mullus barbatus	fresh	2019-07-08	17	44.2292	14.6686	61	NOT AVAILABLE	135	28	M	2c	Library3	TCAGA	GAAGC
17c_50	Mullus barbatus	fresh	2019-07-08	17	44.2292	14.6686	61	NOT AVAILABLE	145	30	F	2b	Library3	TGCAACA	ATACGGT
18a_01	Mullus barbatus	frozen	2019-05-10	18	41.5686	16.7631	121	NOT AVAILABLE	150	38.99	F	3	Library1	TCAGA	CTGGT
18a_02	Mullus barbatus	frozen	2019-05-10	18	41.5686	16.7631	121	NOT AVAILABLE	150	39.56	F	3	Library1	TGCAACA	GTCAAGT
18a_03	Mullus barbatus	frozen	2019-05-10	18	41.5686	16.7631	121	NOT AVAILABLE	135	28.63	F	3	Library1	GATCG	GAAGC
18a_04	Mullus barbatus	frozen	2019-05-10	18	41.5686	16.7631	121	NOT AVAILABLE	150	38.21	F	3	Library1	CGTATCA	ATACGGT
18a_05	Mullus barbatus	frozen	2019-05-10	18	41.5686	16.7631	121	NOT AVAILABLE	140	29.51	F	3	Library1	CATGA	TAGCA
18a_06	Mullus barbatus	frozen	2019-05-10	18	41.5686	16.7631	121	NOT AVAILABLE	135	29.43	F	3	Library1	CACAGAC	AGCTGTC
18a_07	Mullus barbatus	frozen	2019-05-10	18	41.5686	16.7631	121	NOT AVAILABLE	130	25.34	F	3	Library1	ATCGA	AGTCA
18a_08	Mullus barbatus	frozen	2019-05-10	18	41.5686	16.7631	121	NOT AVAILABLE	150	38.84	F	3	Library1	ACTGCAC	TACGTGT
18a_09	Mullus barbatus	frozen	2019-05-10	18	41.5686	16.7631	121	NOT AVAILABLE	125	21.91	F	3	Library1	TCGAG	GCATA
18a_10	Mullus barbatus	frozen	2019-05-10	18	41.5686	16.7631	121	NOT AVAILABLE	135	28.8	F	3	Library1	TCTCTCA	GAGATGT
18a_11	Mullus barbatus	frozen	2019-05-10	18	41.5686	16.7631	121	NOT AVAILABLE	140	29.86	F	3	Library1	GTCAC	CGATC
18a_12	Mullus barbatus	frozen	2019-05-10	18	41.5686	16.7631	121	NOT AVAILABLE	140	32.04	F	3	Library1	GTACACA	CATCTGT
18a_13	Mullus barbatus	frozen	2019-05-10	18	41.5686	16.7631	121	NOT AVAILABLE	150	41.54	F	3	Library1	GCATT	CTGGT
18a_14	Mullus barbatus	frozen	2019-05-10	18	41.5686	16.7631	121	NOT AVAILABLE	160	42.89	F	3	Library1	CTCTTCA	GTCAAGT
18a_15	Mullus barbatus	frozen	2019-05-10	18	41.5686	16.7631	121	NOT AVAILABLE	135	27.24	F	3	Library1	CGATA	GAAGC
18a_16	Mullus barbatus	frozen	2019-05-10	18	41.5686	16.7631	121	NOT AVAILABLE	135	28.02	F	3	Library1	CTAGGAC	ATACGGT
18a_17	Mullus barbatus	frozen	2019-05-10	18	41.5686	16.7631	121	NOT AVAILABLE	145	37.44	F	3	Library1	ACGTA	TAGCA
18a_18	Mullus barbatus	frozen	2019-05-10	18	41.5686	16.7631	121	NOT AVAILABLE	140	32.22	F	2c	Library1	CAGTCAC	AGCTGTC
18a_19	Mullus barbatus	frozen	2019-05-10	18	41.5686	16.7631	121	NOT AVAILABLE	145	33.98	F	2c	Library1	AGAGT	AGTCA
18a_21	Mullus barbatus	frozen	2019-05-10	18	41.5686	16.7631	121	NOT AVAILABLE	135	30.08	F	2c	Library1	GCTAACA	TACGTGT
18a_22	Mullus barbatus	frozen	2019-05-10	18	41.5686	16.7631	121	NOT AVAILABLE	130	25.08	F	2c	Library1	ATGCT	GCATA
18a_23	Mullus barbatus	frozen	2019-05-10	18	41.5686	16.7631	121	NOT AVAILABLE	145	38.58	F	2c	Library1	ACACGAG	GAGATGT
18a_24	Mullus barbatus	frozen	2019-05-10	18	41.5686	16.7631	121	NOT AVAILABLE	130	25.41	F	2c	Library1	GACTA	CGATC
18a_25	Mullus barbatus	frozen	2019-05-10	18	41.5686	16.7631	121	NOT AVAILABLE	135	25.83	F	2c	Library1	AGGACAC	CATCTGT
18a_26	Mullus barbatus	frozen	2019-05-10	18	41.5686	16.7631	121	NOT AVAILABLE	130	25.74	F	2c	Library1	TCAGA	GTCAAGT
18a_27	Mullus barbatus	frozen	2019-05-10	18	41.5686	16.7631	121	NOT AVAILABLE	130	27.51	F	2c	Library1	TGCAACA	GAAGC
18a_28	Mullus barbatus	frozen	2019-05-10	18	41.5686	16.7631	121	NOT AVAILABLE	145	35.06	F	2c	Library1	GATCG	ATACGGT
18a_29	Mullus barbatus	frozen	2019-05-10	18	41.5686	16.7631	121	NOT AVAILABLE	160	44.45	F	2c	Library1	CGTATCA	TAGCA
18a_30	Mullus barbatus	frozen	2019-05-10	18	41.5686	16.7631	121	NOT AVAILABLE	155	46.91	F	3	Library1	CATGA	AGCTGTC
18a_31	Mullus barbatus	frozen	2019-05-10	18	41.5686	16.7631	121	NOT AVAILABLE	155	38.49	M	3	Library1	CACAGAC	AGTCA
18a_32	Mullus barbatus	frozen	2019-05-10	18	41.5686	16.7631	121	NOT AVAILABLE	155	38.71	M	3	Library1	ATCGA	TACGTGT
18a_33	Mullus barbatus	frozen	2019-05-10	18	41.5686	16.7631	121	NOT AVAILABLE	160	42.88	M	3	Library1	ACTGCAC	GCATA
18a_34	Mullus barbatus	frozen	2019-05-10	18	41.5686	16.7631	121	NOT AVAILABLE	150	34.77	M	3	Library1	TCGAG	GAGATGT
18a_35	Mullus barbatus	frozen	2019-05-10	18	41.5686	16.7631	121	NOT AVAILABLE	135	27.49	M	3	Library1	TCTCTCA	CGATC
18a_36	Mullus barbatus	frozen	2019-05-10	18	41.5686	16.7631	121	NOT AVAILABLE	150	33.02	M	3	Library1	GTCAC	CATCTGT
18a_37	Mullus barbatus	frozen	2019-05-10	18	41.5686	16.7631	121	NOT AVAILABLE	125	20.76	M	3	Library1	GTACACA	CTGGT
18a_38	Mullus barbatus	frozen	2019-05-10	18	41.5686	16.7631	121	NOT AVAILABLE	125	20.81	M	3	Library1	GCATT	GTCAAGT
18a_39	Mullus barbatus	frozen	2019-05-10	18	41.5686	16.7631	121	NOT AVAILABLE	130	24.62	M	3	Library1	CTCTTCA	GAAGC
18a_40	Mullus barbatus	frozen	2019-05-10	18	41.5686	16.7631	121	NOT AVAILABLE	155	38.56	M	3	Library1	CGATA	ATACGGT
18a_42	Mullus barbatus	frozen	2019-05-10	18	41.5686	16.7631	121	NOT AVAILABLE	125	20.77	M	3	Library1	CTAGGAC	TAGCA
18a_43	Mullus barbatus	frozen	2019-05-10	18	41.5686	16.7631	121	NOT AVAILABLE	125	21.21	M	3	Library1	ACGTA	AGCTGTC
18a_44	Mullus barbatus	frozen	2019-05-10	18	41.5686	16.7631	121	NOT AVAILABLE	140	28.6	M	3	Library1	CAGTCAC	AGTCA
18a_46	Mullus barbatus	frozen	2019-05-10	18	41.5686	16.7631	121	NOT AVAILABLE	130	21.27	M	2c	Library1	AGAGT	TACGTGT
18a_48	Mullus barbatus	frozen	2019-05-10	18	41.5686	16.7631	121	NOT AVAILABLE	135	27.56	M	2c	Library1	GCTAACA	GCATA
18a_49	Mullus barbatus	frozen	2019-05-10	18	41.5686	16.7631	121	NOT AVAILABLE	125	19.48	M	2c	Library1	ATGCT	GAGATGT
18a_50	Mullus barbatus	frozen	2019-05-10	18	41.5686	16.7631	121	NOT AVAILABLE	125	20.79	M	2c	Library1	ACACGAG	CGATC
18b_02	Mullus barbatus	frozen	2019-07-05	18	40.5964	18.2808	92	14.8	190	85.52	F	3	Library5	CACAGAC	GAAGC
18b_03	Mullus barbatus	frozen	2019-07-05	18	40.5964	18.2808	92	14.8	205	88.63	F	3	Library5	ATCGA	ATACGGT
18b_04	Mullus barbatus	frozen	2019-07-05	18	40.5964	18.2808	92	14.8	170	49.08	F	3	Library5	ACTGCAC	TAGCA
18b_06	Mullus barbatus	frozen	2019-07-05	18	40.5964	18.2808	92	14.8	185	68.8	F	4A	Library5	TCGAG	AGCTGTC
18b_07	Mullus barbatus	frozen	2019-07-05	18	40.5964	18.2808	92	14.8	145	34.89	F	4B	Library5	TCTCTCA	AGTCA
18b_08	Mullus barbatus	frozen	2019-07-05	18	40.5964	18.2808	92	14.8	225	124.62	F	3	Library5	GTCAC	TACGTGT
18b_09	Mullus barbatus	frozen	2019-07-06	18	40.4178	18.5106	110	15	200	92.21	F	3	Library5	GTACACA	GCATA
18b_10	Mullus barbatus	frozen	2019-07-06	18	40.4178	18.5106	110	15	175	54.53	M	3	Library5	GCATT	GAGATGT
18b_11	Mullus barbatus	frozen	2019-07-06	18	40.4178	18.5106	110	15	175	62.32	M	3	Library5	CTCTTCA	CGATC
18b_12	Mullus barbatus	frozen	2019-07-06	18	40.4178	18.5106	110	15	165	50.31	M	3	Library5	CGATA	CATCTGT
18b_13	Mullus barbatus	frozen	2019-07-06	18	40.4178	18.5106	110	15	160	45.47	M	3	Library5	CTAGGAC	CTGGT
18b_15	Mullus barbatus	frozen	2019-07-06	18	40.4178	18.5106	110	15	150	37.92	M	3	Library5	ACGTA	GTCAAGT
18b_16	Mullus barbatus	frozen	2019-07-06	18	40.4178	18.5106	110	15	145	37.32	M	3	Library5	CAGTCAC	GAAGC
18b_17	Mullus barbatus	frozen	2019-07-06	18	40.4178	18.5106	110	15	150	39.88	M	3	Library5	AGAGT	ATACGGT
18b_18	Mullus barbatus	frozen	2019-07-06	18	40.4178	18.5106	110	15	145	33.27	M	3	Library5	GCTAACA	TAGCA
18b_19	Mullus barbatus	frozen	2019-07-06	18	40.4178	18.5106	110	15	160	44.16	M	2c	Library5	ATGCT	AGCTGTC
18b_20	Mullus barbatus	frozen	2019-07-06	18	40.3103	18.4461	80	15.1	190	79.36	F	3	Library5	ACACGAG	AGTCA
18b_21	Mullus barbatus	frozen	2019-07-06	18	40.3103	18.4461	80	15.1	175	63.01	F	3	Library5	GACTA	TACGTGT
18b_22	Mullus barbatus	frozen	2019-07-06	18	40.3103	18.4461	80	15.1	175	55.67	F	3	Library5	AGGACAC	GCATA
18b_23	Mullus barbatus	frozen	2019-07-06	18	40.3103	18.4461	80	15.1	170	53.89	F	3	Library5	TCAGA	CGATC
18b_24	Mullus barbatus	frozen	2019-07-06	18	40.3103	18.4461	80	15.1	170	53.39	F	3	Library5	TGCAACA	CATCTGT
18b_26	Mullus barbatus	frozen	2019-07-06	18	40.3103	18.4461	80	15.1	165	49.1	F	3	Library5	GATCG	CTGGT
18b_27	Mullus barbatus	frozen	2019-07-06	18	40.3103	18.4461	80	15.1	165	46.09	F	4A	Library5	CGTATCA	GTCAAGT
18b_30	Mullus barbatus	frozen	2019-07-06	18	40.3103	18.4461	80	15.1	155	41.21	F	3	Library5	CATGA	GAAGC
18b_31	Mullus barbatus	frozen	2019-07-06	18	40.3103	18.4461	80	15.1	155	44.98	F	4A	Library5	CACAGAC	ATACGGT
18b_32	Mullus barbatus	frozen	2019-07-06	18	40.3103	18.4461	80	15.1	155	32.73	F	4B	Library5	ATCGA	TAGCA
18b_33	Mullus barbatus	frozen	2019-07-06	18	40.3103	18.4461	80	15.1	150	41.26	F	4A	Library5	ACTGCAC	AGCTGTC
18b_35	Mullus barbatus	frozen	2019-07-06	18	40.3103	18.4461	80	15.1	145	35.06	F	4A	Library5	TCGAG	AGTCA
18b_37	Mullus barbatus	frozen	2019-07-06	18	40.3103	18.4461	80	15.1	145	34.17	F	3	Library5	TCTCTCA	TACGTGT
18b_39	Mullus barbatus	frozen	2019-07-06	18	40.3103	18.4461	80	15.1	135	27.95	F	4B	Library5	GTCAC	GCATA
18b_40	Mullus barbatus	frozen	2019-07-06	18	40.3103	18.4461	80	15.1	135	24.99	F	4B	Library5	GTACACA	GAGATGT
18b_42	Mullus barbatus	frozen	2019-07-06	18	40.3103	18.4461	80	15.1	155	42.84	M	4A	Library5	GCATT	CGATC
18b_45	Mullus barbatus	frozen	2019-07-06	18	40.3103	18.4461	80	15.1	145	31.8	M	3	Library5	CTCTTCA	CATCTGT
18b_46	Mullus barbatus	frozen	2019-07-06	18	40.3103	18.4461	80	15.1	145	30.95	M	4A	Library5	CGATA	CTGGT
18b_47	Mullus barbatus	frozen	2019-07-06	18	40.3103	18.4461	80	15.1	140	31.81	M	4A	Library5	CTAGGAC	GTCAAGT
18b_48	Mullus barbatus	frozen	2019-07-06	18	40.3103	18.4461	80	15.1	140	33.74	M	3	Library5	ACGTA	GAAGC
18b_49	Mullus barbatus	frozen	2019-07-06	18	40.3103	18.4461	80	15.1	135	28.21	M	3	Library5	CAGTCAC	ATACGGT
18c_100	Mullus barbatus	frozen	2019-10-29	18	42.2083	18.6531	105	NOT AVAILABLE	150	34.9	M	2b	Library2	GACTA	TACGTGT
18c_51	Mullus barbatus	frozen	2019-10-29	18	42.2083	18.6531	105	NOT AVAILABLE	170	44.24	F	2b	Library2	TCAGA	GCATA
18c_52	Mullus barbatus	frozen	2019-10-29	18	42.2083	18.6531	105	NOT AVAILABLE	180	56.83	F	2b	Library2	TGCAACA	GAGATGT
18c_53	Mullus barbatus	frozen	2019-10-29	18	42.2083	18.6531	105	NOT AVAILABLE	180	59.1	F	2b	Library2	GATCG	CGATC
18c_54	Mullus barbatus	frozen	2019-10-29	18	42.2083	18.6531	105	NOT AVAILABLE	160	43.26	F	2b	Library2	CGTATCA	CATCTGT
18c_55	Mullus barbatus	frozen	2019-10-29	18	42.2083	18.6531	105	NOT AVAILABLE	160	45.37	F	2b	Library2	CATGA	CTGGT
18c_56	Mullus barbatus	frozen	2019-10-29	18	42.2083	18.6531	105	NOT AVAILABLE	165	43.84	F	2b	Library2	CACAGAC	GTCAAGT
18c_57	Mullus barbatus	frozen	2019-10-29	18	42.2083	18.6531	105	NOT AVAILABLE	170	50.8	F	2b	Library2	ATCGA	GAAGC
18c_58	Mullus barbatus	frozen	2019-10-29	18	42.2083	18.6531	105	NOT AVAILABLE	185	58.95	F	2b	Library2	ACTGCAC	ATACGGT
18c_59	Mullus barbatus	frozen	2019-10-29	18	42.2083	18.6531	105	NOT AVAILABLE	145	33.21	F	2b	Library2	TCGAG	TAGCA
18c_60	Mullus barbatus	frozen	2019-10-29	18	42.2083	18.6531	105	NOT AVAILABLE	175	59.79	F	2b	Library2	TCTCTCA	AGCTGTC
18c_61	Mullus barbatus	frozen	2019-10-29	18	42.2083	18.6531	105	NOT AVAILABLE	165	45.3	F	2b	Library2	GTCAC	AGTCA
18c_62	Mullus barbatus	frozen	2019-10-29	18	42.2083	18.6531	105	NOT AVAILABLE	185	58.08	F	2b	Library2	GTACACA	TACGTGT
18c_63	Mullus barbatus	frozen	2019-10-29	18	42.2083	18.6531	105	NOT AVAILABLE	185	61.35	F	2b	Library2	GCATT	GCATA
18c_64	Mullus barbatus	frozen	2019-10-29	18	42.2083	18.6531	105	NOT AVAILABLE	185	68.48	F	2b	Library2	CTCTTCA	GAGATGT
18c_65	Mullus barbatus	frozen	2019-10-29	18	42.2083	18.6531	105	NOT AVAILABLE	175	51.21	F	2b	Library2	CGATA	CGATC
18c_66	Mullus barbatus	frozen	2019-10-29	18	42.2083	18.6531	105	NOT AVAILABLE	165	45.55	F	2b	Library2	CTAGGAC	CATCTGT
18c_67	Mullus barbatus	frozen	2019-10-29	18	42.2083	18.6531	105	NOT AVAILABLE	165	42.87	F	2b	Library2	ACGTA	CTGGT
18c_68	Mullus barbatus	frozen	2019-10-29	18	42.2083	18.6531	105	NOT AVAILABLE	165	44.68	F	2b	Library2	CAGTCAC	GTCAAGT
18c_70	Mullus barbatus	frozen	2019-10-29	18	42.2083	18.6531	105	NOT AVAILABLE	175	54	F	2b	Library2	AGAGT	GAAGC
18c_71	Mullus barbatus	frozen	2019-10-29	18	42.2083	18.6531	105	NOT AVAILABLE	160	38.49	F	2b	Library2	GCTAACA	ATACGGT
18c_72	Mullus barbatus	frozen	2019-10-29	18	42.2083	18.6531	105	NOT AVAILABLE	170	50.1	F	2b	Library2	ATGCT	TAGCA
18c_73	Mullus barbatus	frozen	2019-10-29	18	42.2083	18.6531	105	NOT AVAILABLE	165	44.04	F	2b	Library2	ACACGAG	AGCTGTC
18c_74	Mullus barbatus	frozen	2019-10-29	18	42.2083	18.6531	105	NOT AVAILABLE	165	44.26	F	2b	Library2	GACTA	AGTCA
18c_75	Mullus barbatus	frozen	2019-10-29	18	42.2083	18.6531	105	NOT AVAILABLE	155	37.11	F	2b	Library2	AGGACAC	TACGTGT
18c_76	Mullus barbatus	frozen	2019-10-29	18	42.2083	18.6531	105	NOT AVAILABLE	180	55.11	F	2b	Library2	TCAGA	GAGATGT
18c_77	Mullus barbatus	frozen	2019-10-29	18	42.2083	18.6531	105	NOT AVAILABLE	165	46.72	F	2b	Library2	TGCAACA	CGATC
18c_78	Mullus barbatus	frozen	2019-10-29	18	42.2083	18.6531	105	NOT AVAILABLE	165	47.14	F	2b	Library2	GATCG	CATCTGT
18c_79	Mullus barbatus	frozen	2019-10-29	18	42.2083	18.6531	105	NOT AVAILABLE	170	47.51	F	2b	Library2	CGTATCA	CTGGT
18c_81	Mullus barbatus	frozen	2019-10-29	18	42.2083	18.6531	105	NOT AVAILABLE	145	29.13	M	2b	Library2	CATGA	GTCAAGT
18c_82	Mullus barbatus	frozen	2019-10-29	18	42.2083	18.6531	105	NOT AVAILABLE	155	32.38	M	3	Library2	CACAGAC	GAAGC
18c_83	Mullus barbatus	frozen	2019-10-29	18	42.2083	18.6531	105	NOT AVAILABLE	145	34.03	M	3	Library2	ATCGA	ATACGGT
18c_84	Mullus barbatus	frozen	2019-10-29	18	42.2083	18.6531	105	NOT AVAILABLE	150	35.55	M	3	Library2	ACTGCAC	TAGCA
18c_85	Mullus barbatus	frozen	2019-10-29	18	42.2083	18.6531	105	NOT AVAILABLE	170	50.44	M	2c	Library2	TCGAG	AGCTGTC
18c_86	Mullus barbatus	frozen	2019-10-29	18	42.2083	18.6531	105	NOT AVAILABLE	160	44.62	M	2c	Library2	TCTCTCA	AGTCA
18c_87	Mullus barbatus	frozen	2019-10-29	18	42.2083	18.6531	105	NOT AVAILABLE	155	36.7	M	2c	Library2	GTCAC	TACGTGT
18c_88	Mullus barbatus	frozen	2019-10-29	18	42.2083	18.6531	105	NOT AVAILABLE	165	42.68	M	2c	Library2	GTACACA	GCATA
18c_89	Mullus barbatus	frozen	2019-10-29	18	42.2083	18.6531	105	NOT AVAILABLE	150	33.86	M	2c	Library2	GCATT	GAGATGT
18c_90	Mullus barbatus	frozen	2019-10-29	18	42.2083	18.6531	105	NOT AVAILABLE	140	26.61	M	2c	Library2	CTCTTCA	CGATC
18c_91	Mullus barbatus	frozen	2019-10-29	18	42.2083	18.6531	105	NOT AVAILABLE	160	37.63	M	2c	Library2	CGATA	CATCTGT
18c_92	Mullus barbatus	frozen	2019-10-29	18	42.2083	18.6531	105	NOT AVAILABLE	170	44.63	M	2c	Library2	CTAGGAC	CTGGT
18c_94	Mullus barbatus	frozen	2019-10-29	18	42.2083	18.6531	105	NOT AVAILABLE	145	31.83	M	2c	Library2	ACGTA	GTCAAGT
18c_95	Mullus barbatus	frozen	2019-10-29	18	42.2083	18.6531	105	NOT AVAILABLE	150	32.15	M	2c	Library2	CAGTCAC	GAAGC
18c_96	Mullus barbatus	frozen	2019-10-29	18	42.2083	18.6531	105	NOT AVAILABLE	140	25.85	M	2c	Library2	AGAGT	ATACGGT
18c_97	Mullus barbatus	frozen	2019-10-29	18	42.2083	18.6531	105	NOT AVAILABLE	150	34.95	M	2c	Library2	GCTAACA	TAGCA
18c_98	Mullus barbatus	frozen	2019-10-29	18	42.2083	18.6531	105	NOT AVAILABLE	170	49.3	M	4A	Library2	ATGCT	AGCTGTC
18c_99	Mullus barbatus	frozen	2019-10-29	18	42.2083	18.6531	105	NOT AVAILABLE	175	62.24	M	4A	Library2	ACACGAG	AGTCA
19a_01	Mullus barbatus	frozen	2019-08-02	19	38.2039	16.2611	59	NOT AVAILABLE	145	31.1	M	3	Library3	TCAGA	CGATC
19a_02	Mullus barbatus	frozen	2019-08-02	19	38.2039	16.2611	59	NOT AVAILABLE	170	66.7	F	3	Library3	TGCAACA	CATCTGT
19a_03	Mullus barbatus	frozen	2019-08-02	19	38.2039	16.2611	59	NOT AVAILABLE	146	34.3	M	3	Library3	GATCG	CTGGT
19a_04	Mullus barbatus	frozen	2019-08-02	19	38.2039	16.2611	59	NOT AVAILABLE	140	30.7	M	2c	Library3	CGTATCA	GTCAAGT
19a_05	Mullus barbatus	frozen	2019-08-02	19	38.2039	16.2611	59	NOT AVAILABLE	175	58.5	F	3	Library3	CATGA	GAAGC
19a_06	Mullus barbatus	frozen	2019-08-02	19	38.2039	16.2611	59	NOT AVAILABLE	159	43.4	F	3	Library3	CACAGAC	ATACGGT
19a_07	Mullus barbatus	frozen	2019-08-02	19	38.2039	16.2611	59	NOT AVAILABLE	162	49.4	F	3	Library3	ATCGA	TAGCA
19a_08	Mullus barbatus	frozen	2019-08-02	19	38.2039	16.2611	59	NOT AVAILABLE	158	42.1	F	3	Library3	ACTGCAC	AGCTGTC
19a_09	Mullus barbatus	frozen	2019-08-02	19	38.2039	16.2611	59	NOT AVAILABLE	182	72.4	F	3	Library3	TCGAG	AGTCA
19a_10	Mullus barbatus	frozen	2019-08-02	19	38.2039	16.2611	59	NOT AVAILABLE	172	48	F	3	Library3	TCTCTCA	TACGTGT
19a_11	Mullus barbatus	frozen	2019-08-02	19	38.2039	16.2611	59	NOT AVAILABLE	139	28.8	M	3	Library3	GTCAC	GCATA
19a_12	Mullus barbatus	frozen	2019-08-02	19	38.2039	16.2611	59	NOT AVAILABLE	150	34.3	M	2c	Library3	GTACACA	GAGATGT
19a_13	Mullus barbatus	frozen	2019-08-02	19	38.2039	16.2611	59	NOT AVAILABLE	153	36.1	F	2b	Library3	GCATT	CGATC
19a_14	Mullus barbatus	frozen	2019-08-02	19	38.2039	16.2611	59	NOT AVAILABLE	155	40	F	2b	Library3	CTCTTCA	CATCTGT
19a_15	Mullus barbatus	frozen	2019-08-02	19	38.2039	16.2611	59	NOT AVAILABLE	160	39.7	F	3	Library3	CGATA	CTGGT
19a_16	Mullus barbatus	frozen	2019-08-02	19	38.2039	16.2611	59	NOT AVAILABLE	141	28	M	3	Library3	CTAGGAC	GTCAAGT
19a_17	Mullus barbatus	frozen	2019-08-02	19	38.2039	16.2611	59	NOT AVAILABLE	172	55.4	F	3	Library3	ACGTA	GAAGC
19a_18	Mullus barbatus	frozen	2019-08-02	19	38.2039	16.2611	59	NOT AVAILABLE	137	27.3	M	2c	Library3	CAGTCAC	ATACGGT
19a_19	Mullus barbatus	frozen	2019-08-02	19	38.2039	16.2611	59	NOT AVAILABLE	141	28.6	M	3	Library3	AGAGT	TAGCA
19a_20	Mullus barbatus	frozen	2019-08-02	19	38.2039	16.2611	59	NOT AVAILABLE	130	23.5	F	2a	Library3	GCTAACA	AGCTGTC
19a_21	Mullus barbatus	frozen	2019-08-02	19	38.2039	16.2611	59	NOT AVAILABLE	152	36.7	F	3	Library3	ATGCT	AGTCA
19a_22	Mullus barbatus	frozen	2019-08-02	19	38.2039	16.2611	59	NOT AVAILABLE	151	37.3	F	3	Library3	ACACGAG	TACGTGT
19a_23	Mullus barbatus	frozen	2019-08-02	19	38.2039	16.2611	59	NOT AVAILABLE	140	27.1	F	2a	Library3	GACTA	GCATA
19a_24	Mullus barbatus	frozen	2019-08-02	19	38.2039	16.2611	59	NOT AVAILABLE	166	48.9	F	3	Library3	AGGACAC	GAGATGT
19a_25	Mullus barbatus	frozen	2019-08-02	19	38.2039	16.2611	59	NOT AVAILABLE	157	44.7	F	4a	Library3	TCAGA	CATCTGT
19a_26	Mullus barbatus	frozen	2019-08-02	19	38.2039	16.2611	59	NOT AVAILABLE	143	33.2	M	3	Library3	TGCAACA	CTGGT
19a_27	Mullus barbatus	frozen	2019-08-02	19	38.2039	16.2611	59	NOT AVAILABLE	143	31.6	M	3	Library3	GATCG	GTCAAGT
19a_28	Mullus barbatus	frozen	2019-08-02	19	38.2039	16.2611	59	NOT AVAILABLE	154	41	M	3	Library3	CGTATCA	GAAGC
19a_29	Mullus barbatus	frozen	2019-08-02	19	38.2039	16.2611	59	NOT AVAILABLE	172	53.1	F	3	Library3	CATGA	ATACGGT
19a_30	Mullus barbatus	frozen	2019-08-02	19	38.2039	16.2611	59	NOT AVAILABLE	173	56.8	F	3	Library3	CACAGAC	TAGCA
19a_31	Mullus barbatus	frozen	2019-08-02	19	38.2039	16.2611	59	NOT AVAILABLE	186	68.5	F	3	Library3	ATCGA	AGCTGTC
19a_32	Mullus barbatus	frozen	2019-08-02	19	38.2039	16.2611	59	NOT AVAILABLE	197	78.4	F	3	Library3	ACTGCAC	AGTCA
19a_33	Mullus barbatus	frozen	2019-08-02	19	38.2039	16.2611	59	NOT AVAILABLE	167	48.6	F	2c	Library3	TCGAG	TACGTGT
19a_34	Mullus barbatus	frozen	2019-08-02	19	38.2039	16.2611	59	NOT AVAILABLE	143	27.9	M	2c	Library3	TCTCTCA	GCATA
19a_35	Mullus barbatus	frozen	2019-08-02	19	38.2039	16.2611	59	NOT AVAILABLE	161	46.9	F	3	Library3	GTCAC	GAGATGT
19a_36	Mullus barbatus	frozen	2019-08-02	19	38.2039	16.2611	59	NOT AVAILABLE	165	43.7	F	3	Library3	GTACACA	CGATC
19a_37	Mullus barbatus	frozen	2019-08-02	19	38.2039	16.2611	59	NOT AVAILABLE	133	27.7	M	2c	Library3	GCATT	CATCTGT
19a_38	Mullus barbatus	frozen	2019-08-02	19	38.2039	16.2611	59	NOT AVAILABLE	167	51.4	F	3	Library3	CTCTTCA	CTGGT
19a_39	Mullus barbatus	frozen	2019-08-02	19	38.2039	16.2611	59	NOT AVAILABLE	157	38.8	F	3	Library3	CGATA	GTCAAGT
19a_40	Mullus barbatus	frozen	2019-08-02	19	38.2039	16.2611	59	NOT AVAILABLE	141	29	M	3	Library3	CTAGGAC	GAAGC
19a_41	Mullus barbatus	frozen	2019-08-02	19	38.2039	16.2611	59	NOT AVAILABLE	172	55.3	F	3	Library3	ACGTA	ATACGGT
19a_42	Mullus barbatus	frozen	2019-08-02	19	38.2039	16.2611	59	NOT AVAILABLE	137	30.3	M	2b	Library3	CAGTCAC	TAGCA
19a_43	Mullus barbatus	frozen	2019-08-02	19	38.2039	16.2611	59	NOT AVAILABLE	125	20.3	M	2c	Library3	AGAGT	AGCTGTC
19a_44	Mullus barbatus	frozen	2019-08-02	19	38.2039	16.2611	59	NOT AVAILABLE	139	29.3	F	2c	Library3	GCTAACA	AGTCA
19a_45	Mullus barbatus	frozen	2019-08-02	19	38.2039	16.2611	59	NOT AVAILABLE	132	23.5	M	2c	Library3	ATGCT	TACGTGT
19a_46	Mullus barbatus	frozen	2019-08-02	19	38.2039	16.2611	59	NOT AVAILABLE	155	36.2	F	2c	Library3	ACACGAG	GCATA
19a_47	Mullus barbatus	frozen	2019-08-02	19	38.2039	16.2611	59	NOT AVAILABLE	138	27.9	M	2c	Library3	GACTA	GAGATGT
19a_48	Mullus barbatus	frozen	2019-08-02	19	38.2039	16.2611	59	NOT AVAILABLE	127	20.5	M	2a	Library3	AGGACAC	CGATC
19a_49	Mullus barbatus	frozen	2019-08-02	19	38.2039	16.2611	59	NOT AVAILABLE	141	28.1	M	3	Library3	CATGA	AGTCA
19a_50	Mullus barbatus	frozen	2019-08-02	19	38.2039	16.2611	59	NOT AVAILABLE	162	42	F	3	Library3	CACAGAC	TACGTGT
19b_01	Mullus barbatus	frozen	2019-08-02	19	38.5544	16.6531	109	NOT AVAILABLE	215	109.1	F	3	Library4	ATCGA	CGATC
19b_02	Mullus barbatus	frozen	2019-08-02	19	38.5544	16.6531	109	NOT AVAILABLE	142	29.7	M	3	Library4	ACTGCAC	CATCTGT
19b_03	Mullus barbatus	frozen	2019-08-02	19	38.5544	16.6531	109	NOT AVAILABLE	127	19.8	M	2c	Library4	TCGAG	CTGGT
19b_04	Mullus barbatus	frozen	2019-08-02	19	38.5544	16.6531	109	NOT AVAILABLE	138	26.2	M	3	Library4	TCTCTCA	GTCAAGT
19b_05	Mullus barbatus	frozen	2019-08-02	19	38.5544	16.6531	109	NOT AVAILABLE	190	65.2	F	3	Library4	GTCAC	GAAGC
19b_06	Mullus barbatus	frozen	NOT AVAILABLE	19	38.5544	16.6531	109	NOT AVAILABLE	140	24.5	F	2a	Library4	GTACACA	ATACGGT
19b_08	Mullus barbatus	frozen	NOT AVAILABLE	19	38.5544	16.6531	109	NOT AVAILABLE	141	29.2	M	2c	Library4	GCATT	TAGCA
19b_09	Mullus barbatus	frozen	NOT AVAILABLE	19	38.5544	16.6531	109	NOT AVAILABLE	205	95.8	F	3	Library4	CTCTTCA	AGCTGTC
19b_11	Mullus barbatus	frozen	NOT AVAILABLE	19	38.5544	16.6531	109	NOT AVAILABLE	131	21	M	3	Library4	CGATA	AGTCA
19b_13	Mullus barbatus	frozen	NOT AVAILABLE	19	38.5544	16.6531	109	NOT AVAILABLE	145	31.4	M	2c	Library4	CTAGGAC	TACGTGT
19b_14	Mullus barbatus	frozen	NOT AVAILABLE	19	38.5544	16.6531	109	NOT AVAILABLE	175	56.1	F	3	Library4	ACGTA	GCATA
19b_15	Mullus barbatus	frozen	NOT AVAILABLE	19	38.5544	16.6531	109	NOT AVAILABLE	149	33.8	M	2c	Library4	CAGTCAC	GAGATGT
19b_16	Mullus barbatus	frozen	NOT AVAILABLE	19	38.5544	16.6531	109	NOT AVAILABLE	122	18.5	M	2c	Library4	AGAGT	CGATC
19b_19	Mullus barbatus	frozen	NOT AVAILABLE	19	38.5544	16.6531	109	NOT AVAILABLE	142	30.8	M	2c	Library4	GCTAACA	CATCTGT
19b_20	Mullus barbatus	frozen	NOT AVAILABLE	19	38.5544	16.6531	109	NOT AVAILABLE	122	17	M	2b	Library4	ATGCT	CTGGT
19b_21	Mullus barbatus	frozen	NOT AVAILABLE	19	38.5544	16.6531	109	NOT AVAILABLE	135	22.9	M	2b	Library4	ACACGAG	GTCAAGT
19b_23	Mullus barbatus	frozen	NOT AVAILABLE	19	38.5544	16.6531	109	NOT AVAILABLE	131	20.3	M	2c	Library4	GACTA	GAAGC
19b_25	Mullus barbatus	frozen	NOT AVAILABLE	19	38.5544	16.6531	109	NOT AVAILABLE	125	18.5	M	3	Library4	AGGACAC	ATACGGT
19b_26	Mullus barbatus	frozen	NOT AVAILABLE	19	38.5544	16.6531	109	NOT AVAILABLE	155	38.1	F	4a	Library4	TCAGA	AGCTGTC
19b_29	Mullus barbatus	frozen	2019-08-02	19	38.5544	16.6531	109	NOT AVAILABLE	158	41.9	F	2c	Library4	TGCAACA	AGTCA
19b_30	Mullus barbatus	frozen	2019-08-02	19	38.5544	16.6531	109	NOT AVAILABLE	194	79	F	3	Library4	GATCG	TACGTGT
19b_31	Mullus barbatus	frozen	2019-08-02	19	38.5544	16.6531	109	NOT AVAILABLE	175	50.8	F	3	Library4	CGTATCA	GCATA
19b_32	Mullus barbatus	frozen	2019-08-02	19	38.5544	16.6531	109	NOT AVAILABLE	160	47.8	F	2b	Library4	CATGA	GAGATGT
19b_33	Mullus barbatus	frozen	2019-08-02	19	38.5544	16.6531	109	NOT AVAILABLE	158	41.9	F	2b	Library4	CACAGAC	CGATC
19b_34	Mullus barbatus	frozen	2019-08-02	19	38.5544	16.6531	109	NOT AVAILABLE	160	41	F	2c	Library4	ATCGA	CATCTGT
19b_35	Mullus barbatus	frozen	2019-08-02	19	38.5544	16.6531	109	NOT AVAILABLE	148	34.6	F	2b	Library4	ACTGCAC	CTGGT
19b_36	Mullus barbatus	frozen	2019-08-02	19	38.5544	16.6531	109	NOT AVAILABLE	147	31.5	F	2c	Library4	TCGAG	GTCAAGT
19b_37	Mullus barbatus	frozen	2019-08-02	19	38.5544	16.6531	109	NOT AVAILABLE	183	67.7	F	3	Library4	TCTCTCA	GAAGC
19b_38	Mullus barbatus	frozen	2019-08-02	19	38.5544	16.6531	109	NOT AVAILABLE	192	74.9	F	3	Library4	GTCAC	ATACGGT
19b_39	Mullus barbatus	frozen	2019-08-02	19	38.5544	16.6531	109	NOT AVAILABLE	170	51.9	F	3	Library4	GTACACA	TAGCA
19b_40	Mullus barbatus	frozen	2019-08-02	19	38.5544	16.6531	109	NOT AVAILABLE	160	43.2	F	4a	Library4	GCATT	AGCTGTC
19b_42	Mullus barbatus	frozen	2019-08-02	19	38.5544	16.6531	109	NOT AVAILABLE	172	63.6	F	3	Library4	CTCTTCA	AGTCA
19b_43	Mullus barbatus	frozen	2019-08-02	19	38.5544	16.6531	109	NOT AVAILABLE	185	67.1	F	3	Library4	CGATA	TACGTGT
19b_44	Mullus barbatus	frozen	2019-08-02	19	38.5544	16.6531	109	NOT AVAILABLE	174	51.1	F	3	Library4	CTAGGAC	GCATA
19b_45	Mullus barbatus	frozen	2019-08-02	19	38.5544	16.6531	109	NOT AVAILABLE	153	42.3	F	3	Library4	ACGTA	GAGATGT
19b_46	Mullus barbatus	frozen	2019-08-02	19	38.5544	16.6531	109	NOT AVAILABLE	158	34.5	F	4a	Library4	CAGTCAC	CGATC
19b_47	Mullus barbatus	frozen	2019-08-02	19	38.5544	16.6531	109	NOT AVAILABLE	155	39.3	F	2c	Library4	AGAGT	CATCTGT
19b_48	Mullus barbatus	frozen	2019-08-02	19	38.5544	16.6531	109	NOT AVAILABLE	165	49.4	F	2c	Library4	GCTAACA	CTGGT
19b_50	Mullus barbatus	frozen	2019-08-02	19	38.5544	16.6531	109	NOT AVAILABLE	148	33.8	F	3	Library4	ATGCT	GTCAAGT
19cd_01	Mullus barbatus	frozen	2019-08-01	19	40.2344	16.8042	26	NOT AVAILABLE	137	29.9	F	2a	Library4	ACACGAG	GAAGC
19cd_02	Mullus barbatus	frozen	2019-08-01	19	40.2344	16.8042	26	NOT AVAILABLE	143	31.1	F	2a	Library4	GACTA	ATACGGT
19cd_04	Mullus barbatus	frozen	2019-08-01	19	40.2344	16.8042	26	NOT AVAILABLE	152	40.6	F	2b	Library4	AGGACAC	TAGCA
19cd_05	Mullus barbatus	frozen	2019-08-01	19	40.2344	16.8042	26	NOT AVAILABLE	142	35	M	3	Library4	TCAGA	AGTCA
19cd_07	Mullus barbatus	frozen	2019-08-01	19	40.2344	16.8042	26	NOT AVAILABLE	150	38.7	F	2b	Library4	TGCAACA	TACGTGT
19cd_08	Mullus barbatus	frozen	2019-08-01	19	40.2344	16.8042	26	NOT AVAILABLE	141	32.2	M	2c	Library4	GATCG	GCATA
19cd_09	Mullus barbatus	frozen	2019-08-01	19	40.2344	16.8042	26	NOT AVAILABLE	143	34	F	2a	Library4	CGTATCA	GAGATGT
19cd_10	Mullus barbatus	frozen	2019-08-01	19	40.2344	16.8042	26	NOT AVAILABLE	152	39.8	M	2b	Library4	CATGA	CGATC
19cd_11	Mullus barbatus	frozen	2019-08-01	19	40.2344	16.8042	26	NOT AVAILABLE	155	40.9	F	2c	Library4	CACAGAC	CATCTGT
19cd_12	Mullus barbatus	frozen	2019-08-01	19	40.2344	16.8042	26	NOT AVAILABLE	138	28.8	M	3	Library4	ATCGA	CTGGT
19cd_13	Mullus barbatus	frozen	2019-08-01	19	40.2344	16.8042	26	NOT AVAILABLE	157	46.5	F	2c	Library4	ACTGCAC	GTCAAGT
19cd_15	Mullus barbatus	frozen	2019-08-01	19	40.2344	16.8042	26	NOT AVAILABLE	165	46.6	F	3	Library4	TCGAG	GAAGC
19cd_19	Mullus barbatus	frozen	2019-08-01	19	40.2344	16.8042	26	NOT AVAILABLE	167	56.2	F	3	Library4	TCTCTCA	ATACGGT
19cd_20	Mullus barbatus	frozen	2019-08-01	19	40.2344	16.8042	26	NOT AVAILABLE	150	42.3	F	2c	Library4	GTCAC	TAGCA
19cd_21	Mullus barbatus	frozen	2019-08-01	19	40.2344	16.8042	26	NOT AVAILABLE	135	31.5	F	2a	Library4	GTACACA	AGCTGTC
19cd_23	Mullus barbatus	frozen	2019-08-01	19	40.2344	16.8042	26	NOT AVAILABLE	179	63.7	F	2b	Library4	GCATT	AGTCA
19cd_24	Mullus barbatus	frozen	2019-08-01	19	40.2344	16.8042	26	NOT AVAILABLE	149	40.8	F	2b	Library4	CTCTTCA	TACGTGT
19cd_25	Mullus barbatus	frozen	2019-08-01	19	40.2344	16.8042	26	NOT AVAILABLE	143	33.6	F	2a	Library4	CGATA	GCATA
19cd_26	Mullus barbatus	frozen	2019-08-01	19	40.2344	16.8042	26	NOT AVAILABLE	151	32.4	F	2b	Library4	CTAGGAC	GAGATGT
19cd_27	Mullus barbatus	frozen	2019-08-01	19	40.2344	16.8042	26	NOT AVAILABLE	135	30.3	M	2a	Library4	ACGTA	CGATC
19cd_28	Mullus barbatus	frozen	2019-08-01	19	40.2344	16.8042	26	NOT AVAILABLE	138	28.3	M	2b	Library4	CAGTCAC	CATCTGT
19cd_29	Mullus barbatus	frozen	2019-08-01	19	40.2344	16.8042	26	NOT AVAILABLE	160	46	F	2b	Library4	AGAGT	CTGGT
19cd_30	Mullus barbatus	frozen	2019-08-01	19	40.2344	16.8042	26	NOT AVAILABLE	143	34.8	F	2a	Library4	GCTAACA	GTCAAGT
19cd_31	Mullus barbatus	frozen	2019-08-01	19	40.2344	16.8042	26	NOT AVAILABLE	157	44.4	F	3	Library4	ATGCT	GAAGC
19cd_32	Mullus barbatus	frozen	2019-08-01	19	40.2344	16.8042	26	NOT AVAILABLE	141	34.2	M	2b	Library4	ACACGAG	ATACGGT
19cd_33	Mullus barbatus	frozen	2019-08-01	19	40.2344	16.8042	26	NOT AVAILABLE	197	89.9	F	2c	Library4	GACTA	TAGCA
19cd_34	Mullus barbatus	frozen	2019-08-01	19	40.2344	16.8042	26	NOT AVAILABLE	193	87.9	F	3	Library4	AGGACAC	AGCTGTC
19cd_35	Mullus barbatus	frozen	2019-08-01	19	40.2344	16.8042	26	NOT AVAILABLE	152	37.4	F	2b	Library4	TCAGA	TACGTGT
19cd_36	Mullus barbatus	frozen	2019-08-01	19	40.2344	16.8042	26	NOT AVAILABLE	171	54.3	F	3	Library4	TGCAACA	GCATA
19cd_37	Mullus barbatus	frozen	2019-08-01	19	40.2344	16.8042	26	NOT AVAILABLE	169	58.3	F	3	Library4	GATCG	GAGATGT
19cd_38	Mullus barbatus	frozen	2019-08-01	19	40.2344	16.8042	26	NOT AVAILABLE	143	31.9	F	2a	Library4	CGTATCA	CGATC
19cd_39	Mullus barbatus	frozen	2019-08-01	19	40.2344	16.8042	26	NOT AVAILABLE	172	60.1	F	3	Library4	CATGA	CATCTGT
19cd_40	Mullus barbatus	frozen	2019-08-01	19	40.2344	16.8042	26	NOT AVAILABLE	176	72.8	F	3	Library4	CACAGAC	CTGGT
19cd_41	Mullus barbatus	frozen	2019-08-01	19	40.2344	16.8042	26	NOT AVAILABLE	154	46.1	M	3	Library4	ATCGA	GTCAAGT
19cd_42	Mullus barbatus	frozen	2019-08-01	19	40.2344	16.8042	26	NOT AVAILABLE	145	34.9	M	2b	Library4	ACTGCAC	GAAGC
19cd_45	Mullus barbatus	frozen	2019-09-26	19	39.7433	16.5614	95	NOT AVAILABLE	125	20.3	M	4B	Library4	TCGAG	ATACGGT
19cd_47	Mullus barbatus	frozen	2019-09-26	19	39.7433	16.5614	95	NOT AVAILABLE	130	20.8	M	4B	Library4	TCTCTCA	TAGCA
19cd_48	Mullus barbatus	frozen	2019-09-26	19	39.7433	16.5614	95	NOT AVAILABLE	135	22.9	M	4A	Library4	GTCAC	AGCTGTC
19cd_49	Mullus barbatus	frozen	2019-09-26	19	39.7433	16.5614	95	NOT AVAILABLE	140	27.9	M	4B	Library4	GTACACA	AGTCA
19cd_50	Mullus barbatus	frozen	2019-09-26	19	39.7433	16.5614	95	NOT AVAILABLE	145	31.7	M	4B	Library4	GCATT	TACGTGT
20a_03	Mullus barbatus	NOT AVAILABLE	NOT AVAILABLE	20	39.7015	19.881	42	NOT AVAILABLE	159	95.2	M	2	Library5	AGAGT	TAGCA
20a_06	Mullus barbatus	NOT AVAILABLE	NOT AVAILABLE	20	39.7015	19.881	42	NOT AVAILABLE	167	46	F	2	Library5	GCTAACA	AGCTGTC
20a_09	Mullus barbatus	NOT AVAILABLE	NOT AVAILABLE	20	39.7015	19.881	42	NOT AVAILABLE	182	67.2	F	2	Library5	ATGCT	AGTCA
20a_12	Mullus barbatus	NOT AVAILABLE	NOT AVAILABLE	20	39.7015	19.881	42	NOT AVAILABLE	172	57.8	F	2	Library5	ACACGAG	TACGTGT
20a_13	Mullus barbatus	NOT AVAILABLE	NOT AVAILABLE	20	39.7015	19.881	42	NOT AVAILABLE	186	69.8	F	2	Library5	GACTA	GCATA
20a_14	Mullus barbatus	NOT AVAILABLE	NOT AVAILABLE	20	39.7015	19.881	42	NOT AVAILABLE	177	65.2	F	2	Library5	AGGACAC	GAGATGT
20a_15	Mullus barbatus	NOT AVAILABLE	NOT AVAILABLE	20	39.7015	19.881	42	NOT AVAILABLE	167	50.2	M	3	Library5	TCAGA	CATCTGT
20a_18	Mullus barbatus	NOT AVAILABLE	NOT AVAILABLE	20	39.7015	19.881	42	NOT AVAILABLE	170	57.8	M	3	Library5	TGCAACA	CTGGT
20a_30	Mullus barbatus	NOT AVAILABLE	NOT AVAILABLE	20	39.187	20.2823	87	NOT AVAILABLE	163	44.1	F	2	Library5	GATCG	GTCAAGT
20a_31	Mullus barbatus	NOT AVAILABLE	NOT AVAILABLE	20	39.187	20.2823	87	NOT AVAILABLE	135	24.9	M	2	Library5	CGTATCA	GAAGC
20a_37	Mullus barbatus	NOT AVAILABLE	NOT AVAILABLE	20	39.187	20.2823	87	NOT AVAILABLE	151	35.6	M	2	Library5	CATGA	ATACGGT
20a_38	Mullus barbatus	NOT AVAILABLE	NOT AVAILABLE	20	39.187	20.2823	87	NOT AVAILABLE	200	79.4	F	2	Library5	CACAGAC	TAGCA
20a_41	Mullus barbatus	NOT AVAILABLE	NOT AVAILABLE	20	39.187	20.2823	87	NOT AVAILABLE	137	26.5	M	2	Library5	ATCGA	AGCTGTC
20a_43	Mullus barbatus	NOT AVAILABLE	NOT AVAILABLE	20	39.187	20.2823	87	NOT AVAILABLE	185	62	F	2	Library5	ACTGCAC	AGTCA
20a_47	Mullus barbatus	NOT AVAILABLE	NOT AVAILABLE	20	39.187	20.2823	87	NOT AVAILABLE	160	44.1	M	2	Library5	CGTATCA	AGCTGTC
20a_48	Mullus barbatus	NOT AVAILABLE	NOT AVAILABLE	20	39.187	20.2823	87	NOT AVAILABLE	120	15	M	2	Library5	CATGA	AGTCA
23p_10	Mullus barbatus	NOT AVAILABLE	2019-04-12	23	35.3801	25.4796	168.5	NOT AVAILABLE	135	23.86	M	2	Library5	TCAGA	CTGGT
23p_21	Mullus barbatus	NOT AVAILABLE	2019-04-12	23	35.3801	25.4796	168.5	NOT AVAILABLE	143	30.85	M	2	Library5	TGCAACA	GTCAAGT
23p_45	Mullus barbatus	NOT AVAILABLE	2019-04-12	23	35.3552	25.0864	33.5	NOT AVAILABLE	147	35.61	F	2	Library5	GATCG	GAAGC
23p_46	Mullus barbatus	NOT AVAILABLE	2019-04-12	23	35.3552	25.0864	33.5	NOT AVAILABLE	160	45.55	F	2	Library5	CGTATCA	ATACGGT
23p_47	Mullus barbatus	NOT AVAILABLE	2019-04-12	23	35.3552	25.0864	33.5	NOT AVAILABLE	140	28.34	F	2	Library5	CATGA	TAGCA
23p_51	Mullus barbatus	NOT AVAILABLE	2019-04-12	23	35.3552	25.0864	33.5	NOT AVAILABLE	156	41.99	F	2	Library5	CACAGAC	AGCTGTC
23p_55	Mullus barbatus	NOT AVAILABLE	2019-04-12	23	35.3552	25.0864	33.5	NOT AVAILABLE	131	23.41	F	2	Library5	ATCGA	AGTCA
23p_57	Mullus barbatus	NOT AVAILABLE	2019-04-12	23	35.3552	25.0864	33.5	NOT AVAILABLE	127	22.41	F	2	Library5	ACTGCAC	TACGTGT
23p_59	Mullus barbatus	NOT AVAILABLE	2019-04-12	23	NOT AVAILABLE	NOT AVAILABLE	NOT AVAILABLE	NOT AVAILABLE	NOT AVAILABLE	NOT AVAILABLE	NOT AVAILABLE	NOT AVAILABLE	Library5	TCGAG	GCATA
23p_60	Mullus barbatus	NOT AVAILABLE	2019-04-12	23	NOT AVAILABLE	NOT AVAILABLE	NOT AVAILABLE	NOT AVAILABLE	NOT AVAILABLE	NOT AVAILABLE	NOT AVAILABLE	NOT AVAILABLE	Library5	TCTCTCA	GAGATGT
23p_61	Mullus barbatus	NOT AVAILABLE	2019-04-12	23	NOT AVAILABLE	NOT AVAILABLE	NOT AVAILABLE	NOT AVAILABLE	NOT AVAILABLE	NOT AVAILABLE	NOT AVAILABLE	NOT AVAILABLE	Library5	GTCAC	CGATC
23p_62	Mullus barbatus	NOT AVAILABLE	2019-04-12	23	NOT AVAILABLE	NOT AVAILABLE	NOT AVAILABLE	NOT AVAILABLE	NOT AVAILABLE	NOT AVAILABLE	NOT AVAILABLE	NOT AVAILABLE	Library5	GTACACA	CATCTGT
23p_63	Mullus barbatus	NOT AVAILABLE	2019-04-12	23	NOT AVAILABLE	NOT AVAILABLE	NOT AVAILABLE	NOT AVAILABLE	NOT AVAILABLE	NOT AVAILABLE	NOT AVAILABLE	NOT AVAILABLE	Library5	GCATT	CTGGT
23p_64	Mullus barbatus	NOT AVAILABLE	2019-04-12	23	NOT AVAILABLE	NOT AVAILABLE	NOT AVAILABLE	NOT AVAILABLE	NOT AVAILABLE	NOT AVAILABLE	NOT AVAILABLE	NOT AVAILABLE	Library5	CTCTTCA	GTCAAGT
23p_65	Mullus barbatus	NOT AVAILABLE	2019-04-12	23	NOT AVAILABLE	NOT AVAILABLE	NOT AVAILABLE	NOT AVAILABLE	NOT AVAILABLE	NOT AVAILABLE	NOT AVAILABLE	NOT AVAILABLE	Library5	CGATA	GAAGC
23p_66	Mullus barbatus	NOT AVAILABLE	2019-04-12	23	NOT AVAILABLE	NOT AVAILABLE	NOT AVAILABLE	NOT AVAILABLE	NOT AVAILABLE	NOT AVAILABLE	NOT AVAILABLE	NOT AVAILABLE	Library5	CTAGGAC	ATACGGT
23p_67	Mullus barbatus	NOT AVAILABLE	2019-04-12	23	NOT AVAILABLE	NOT AVAILABLE	NOT AVAILABLE	NOT AVAILABLE	NOT AVAILABLE	NOT AVAILABLE	NOT AVAILABLE	NOT AVAILABLE	Library5	ACGTA	TAGCA
23p_68	Mullus barbatus	NOT AVAILABLE	2019-04-12	23	NOT AVAILABLE	NOT AVAILABLE	NOT AVAILABLE	NOT AVAILABLE	NOT AVAILABLE	NOT AVAILABLE	NOT AVAILABLE	NOT AVAILABLE	Library5	CAGTCAC	AGCTGTC
23p_69	Mullus barbatus	NOT AVAILABLE	2019-04-12	23	NOT AVAILABLE	NOT AVAILABLE	NOT AVAILABLE	NOT AVAILABLE	NOT AVAILABLE	NOT AVAILABLE	NOT AVAILABLE	NOT AVAILABLE	Library5	AGAGT	AGTCA
23p_70	Mullus barbatus	NOT AVAILABLE	2019-04-12	23	NOT AVAILABLE	NOT AVAILABLE	NOT AVAILABLE	NOT AVAILABLE	NOT AVAILABLE	NOT AVAILABLE	NOT AVAILABLE	NOT AVAILABLE	Library5	GCTAACA	TACGTGT
23p_71	Mullus barbatus	NOT AVAILABLE	2019-04-12	23	NOT AVAILABLE	NOT AVAILABLE	NOT AVAILABLE	NOT AVAILABLE	NOT AVAILABLE	NOT AVAILABLE	NOT AVAILABLE	NOT AVAILABLE	Library5	ATGCT	GCATA
23p_72	Mullus barbatus	NOT AVAILABLE	2019-04-12	23	NOT AVAILABLE	NOT AVAILABLE	NOT AVAILABLE	NOT AVAILABLE	NOT AVAILABLE	NOT AVAILABLE	NOT AVAILABLE	NOT AVAILABLE	Library5	ACACGAG	GAGATGT
23p_73	Mullus barbatus	NOT AVAILABLE	2019-04-12	23	NOT AVAILABLE	NOT AVAILABLE	NOT AVAILABLE	NOT AVAILABLE	NOT AVAILABLE	NOT AVAILABLE	NOT AVAILABLE	NOT AVAILABLE	Library5	GACTA	CGATC
23p_74	Mullus barbatus	NOT AVAILABLE	2019-04-12	23	NOT AVAILABLE	NOT AVAILABLE	NOT AVAILABLE	NOT AVAILABLE	NOT AVAILABLE	NOT AVAILABLE	NOT AVAILABLE	NOT AVAILABLE	Library5	AGGACAC	CATCTGT
23p_75	Mullus barbatus	NOT AVAILABLE	2019-04-12	23	NOT AVAILABLE	NOT AVAILABLE	NOT AVAILABLE	NOT AVAILABLE	NOT AVAILABLE	NOT AVAILABLE	NOT AVAILABLE	NOT AVAILABLE	Library5	TCAGA	GTCAAGT
23p_76	Mullus barbatus	NOT AVAILABLE	2019-04-12	23	NOT AVAILABLE	NOT AVAILABLE	NOT AVAILABLE	NOT AVAILABLE	NOT AVAILABLE	NOT AVAILABLE	NOT AVAILABLE	NOT AVAILABLE	Library5	TGCAACA	GAAGC
23p_77	Mullus barbatus	NOT AVAILABLE	2019-04-12	23	NOT AVAILABLE	NOT AVAILABLE	NOT AVAILABLE	NOT AVAILABLE	NOT AVAILABLE	NOT AVAILABLE	NOT AVAILABLE	NOT AVAILABLE	Library5	GATCG	ATACGGT
23p_78	Mullus barbatus	NOT AVAILABLE	2019-04-12	23	NOT AVAILABLE	NOT AVAILABLE	NOT AVAILABLE	NOT AVAILABLE	NOT AVAILABLE	NOT AVAILABLE	NOT AVAILABLE	NOT AVAILABLE	Library5	CGTATCA	TAGCA
23p_79	Mullus barbatus	NOT AVAILABLE	2019-04-12	23	NOT AVAILABLE	NOT AVAILABLE	NOT AVAILABLE	NOT AVAILABLE	NOT AVAILABLE	NOT AVAILABLE	NOT AVAILABLE	NOT AVAILABLE	Library5	CATGA	AGCTGTC
23p_80	Mullus barbatus	NOT AVAILABLE	2019-04-12	23	NOT AVAILABLE	NOT AVAILABLE	NOT AVAILABLE	NOT AVAILABLE	NOT AVAILABLE	NOT AVAILABLE	NOT AVAILABLE	NOT AVAILABLE	Library5	CACAGAC	AGTCA
23p_81	Mullus barbatus	NOT AVAILABLE	2019-04-12	23	NOT AVAILABLE	NOT AVAILABLE	NOT AVAILABLE	NOT AVAILABLE	NOT AVAILABLE	NOT AVAILABLE	NOT AVAILABLE	NOT AVAILABLE	Library5	ATCGA	TACGTGT
23p_82	Mullus barbatus	NOT AVAILABLE	2019-04-12	23	NOT AVAILABLE	NOT AVAILABLE	NOT AVAILABLE	NOT AVAILABLE	NOT AVAILABLE	NOT AVAILABLE	NOT AVAILABLE	NOT AVAILABLE	Library5	ACTGCAC	GCATA
23p_83	Mullus barbatus	NOT AVAILABLE	2019-04-12	23	NOT AVAILABLE	NOT AVAILABLE	NOT AVAILABLE	NOT AVAILABLE	NOT AVAILABLE	NOT AVAILABLE	NOT AVAILABLE	NOT AVAILABLE	Library5	TCGAG	GAGATGT
23p_84	Mullus barbatus	NOT AVAILABLE	2019-04-12	23	NOT AVAILABLE	NOT AVAILABLE	NOT AVAILABLE	NOT AVAILABLE	NOT AVAILABLE	NOT AVAILABLE	NOT AVAILABLE	NOT AVAILABLE	Library5	TCTCTCA	CGATC
23p_85	Mullus barbatus	NOT AVAILABLE	2019-04-12	23	NOT AVAILABLE	NOT AVAILABLE	NOT AVAILABLE	NOT AVAILABLE	NOT AVAILABLE	NOT AVAILABLE	NOT AVAILABLE	NOT AVAILABLE	Library5	GTCAC	CATCTGT
23p_86	Mullus barbatus	NOT AVAILABLE	2019-04-12	23	NOT AVAILABLE	NOT AVAILABLE	NOT AVAILABLE	NOT AVAILABLE	NOT AVAILABLE	NOT AVAILABLE	NOT AVAILABLE	NOT AVAILABLE	Library5	GTACACA	CTGGT
23p_87	Mullus barbatus	NOT AVAILABLE	2019-04-12	23	NOT AVAILABLE	NOT AVAILABLE	NOT AVAILABLE	NOT AVAILABLE	NOT AVAILABLE	NOT AVAILABLE	NOT AVAILABLE	NOT AVAILABLE	Library5	GCATT	GTCAAGT
23p_88	Mullus barbatus	NOT AVAILABLE	2019-04-12	23	NOT AVAILABLE	NOT AVAILABLE	NOT AVAILABLE	NOT AVAILABLE	NOT AVAILABLE	NOT AVAILABLE	NOT AVAILABLE	NOT AVAILABLE	Library5	CTCTTCA	GAAGC
23p_89	Mullus barbatus	NOT AVAILABLE	2019-04-12	23	NOT AVAILABLE	NOT AVAILABLE	NOT AVAILABLE	NOT AVAILABLE	NOT AVAILABLE	NOT AVAILABLE	NOT AVAILABLE	NOT AVAILABLE	Library5	CGATA	ATACGGT
23p_90	Mullus barbatus	NOT AVAILABLE	2019-04-12	23	NOT AVAILABLE	NOT AVAILABLE	NOT AVAILABLE	NOT AVAILABLE	NOT AVAILABLE	NOT AVAILABLE	NOT AVAILABLE	NOT AVAILABLE	Library5	CTAGGAC	TAGCA
23p_91	Mullus barbatus	NOT AVAILABLE	2019-04-12	23	NOT AVAILABLE	NOT AVAILABLE	NOT AVAILABLE	NOT AVAILABLE	NOT AVAILABLE	NOT AVAILABLE	NOT AVAILABLE	NOT AVAILABLE	Library5	ACGTA	AGCTGTC
23p_92	Mullus barbatus	NOT AVAILABLE	2019-04-12	23	NOT AVAILABLE	NOT AVAILABLE	NOT AVAILABLE	NOT AVAILABLE	NOT AVAILABLE	NOT AVAILABLE	NOT AVAILABLE	NOT AVAILABLE	Library5	CAGTCAC	AGTCA
23p_93	Mullus barbatus	NOT AVAILABLE	2019-04-12	23	NOT AVAILABLE	NOT AVAILABLE	NOT AVAILABLE	NOT AVAILABLE	NOT AVAILABLE	NOT AVAILABLE	NOT AVAILABLE	NOT AVAILABLE	Library5	AGAGT	TACGTGT
23p_94	Mullus barbatus	NOT AVAILABLE	2019-04-12	23	NOT AVAILABLE	NOT AVAILABLE	NOT AVAILABLE	NOT AVAILABLE	NOT AVAILABLE	NOT AVAILABLE	NOT AVAILABLE	NOT AVAILABLE	Library5	GCTAACA	GCATA
23p_95	Mullus barbatus	NOT AVAILABLE	2019-04-12	23	NOT AVAILABLE	NOT AVAILABLE	NOT AVAILABLE	NOT AVAILABLE	NOT AVAILABLE	NOT AVAILABLE	NOT AVAILABLE	NOT AVAILABLE	Library5	ATGCT	GAGATGT
23p_96	Mullus barbatus	NOT AVAILABLE	2019-04-12	23	NOT AVAILABLE	NOT AVAILABLE	NOT AVAILABLE	NOT AVAILABLE	NOT AVAILABLE	NOT AVAILABLE	NOT AVAILABLE	NOT AVAILABLE	Library5	ACACGAG	CGATC
23p_97	Mullus barbatus	NOT AVAILABLE	2019-04-12	23	NOT AVAILABLE	NOT AVAILABLE	NOT AVAILABLE	NOT AVAILABLE	NOT AVAILABLE	NOT AVAILABLE	NOT AVAILABLE	NOT AVAILABLE	Library5	GACTA	CATCTGT
25c_01	Mullus barbatus	frozen	2019-05-31	25	34.675	33.1108	70	NOT AVAILABLE	155	39.05	F	2b	Library4	TCAGA	GCATA
25c_02	Mullus barbatus	frozen	2019-05-31	25	34.675	33.1108	70	NOT AVAILABLE	140	27.9	M	2b	Library4	TGCAACA	GAGATGT
25c_09	Mullus barbatus	frozen	2019-05-31	25	34.675	33.1108	70	NOT AVAILABLE	151	33.49	M	2c	Library4	GATCG	CGATC
25c_10	Mullus barbatus	frozen	2019-05-31	25	34.675	33.1108	70	NOT AVAILABLE	152	34.82	M	2c	Library4	CGTATCA	CATCTGT
25c_11	Mullus barbatus	frozen	2019-05-31	25	34.675	33.1108	70	NOT AVAILABLE	152	36.46	M	2b	Library4	CATGA	CTGGT
25c_13	Mullus barbatus	frozen	2019-05-31	25	34.675	33.1108	70	NOT AVAILABLE	145	29.72	M	2b	Library4	CACAGAC	GTCAAGT
25c_14	Mullus barbatus	frozen	2019-05-31	25	34.675	33.1108	70	NOT AVAILABLE	133	24.22	M	2b	Library4	ATCGA	GAAGC
25c_20	Mullus barbatus	frozen	2019-05-31	25	34.675	33.1108	70	NOT AVAILABLE	175	55.1	M	2c	Library4	ACTGCAC	ATACGGT
25c_21	Mullus barbatus	frozen	2019-05-31	25	34.675	33.1108	70	NOT AVAILABLE	137	25.73	M	2c	Library4	TCGAG	TAGCA
25c_22	Mullus barbatus	frozen	2019-05-31	25	34.675	33.1108	70	NOT AVAILABLE	150	36.1	M	2b	Library4	TCTCTCA	AGCTGTC
25c_24	Mullus barbatus	frozen	2019-05-31	25	34.675	33.1108	70	NOT AVAILABLE	142	29.62	M	2b	Library4	GTCAC	AGTCA
25c_27	Mullus barbatus	frozen	2019-05-31	25	34.675	33.1108	70	NOT AVAILABLE	147	30.62	M	2c	Library4	GTACACA	TACGTGT
25c_29	Mullus barbatus	frozen	2019-05-31	25	34.675	33.1108	70	NOT AVAILABLE	140	30.6	M	2c	Library4	GCATT	GCATA
25c_30	Mullus barbatus	frozen	2019-05-31	25	34.675	33.1108	70	NOT AVAILABLE	137	27.43	M	2c	Library4	CTCTTCA	GAGATGT
25c_32	Mullus barbatus	frozen	2019-05-31	25	34.675	33.1108	70	NOT AVAILABLE	141	28.9	M	2b	Library4	CGATA	CGATC
25c_35	Mullus barbatus	frozen	2019-05-31	25	34.675	33.1108	70	NOT AVAILABLE	160	40.18	M	2c	Library4	CTAGGAC	CATCTGT
25c_39	Mullus barbatus	frozen	2019-05-31	25	34.675	33.1108	70	NOT AVAILABLE	156	38.97	F	2c	Library4	ACGTA	CTGGT
25c_40	Mullus barbatus	frozen	2019-05-31	25	34.675	33.1108	70	NOT AVAILABLE	142	32.3	M	2c	Library4	CAGTCAC	GTCAAGT
25c_44	Mullus barbatus	frozen	2019-05-31	25	34.675	33.1108	70	NOT AVAILABLE	128	20.78	M	2b	Library4	AGAGT	GAAGC
25c_45	Mullus barbatus	frozen	2019-05-31	25	34.675	33.1108	70	NOT AVAILABLE	135	25.49	M	2b	Library4	GCTAACA	ATACGGT
25c_50	Mullus barbatus	frozen	2019-05-31	25	34.675	33.1108	70	NOT AVAILABLE	161	45.89	M	2b	Library4	ATGCT	TAGCA
25c_52	Mullus barbatus	frozen	2019-11-11	25	34.6536	33.2361	100	NOT AVAILABLE	212	117.84	F	2b	Library4	ACACGAG	AGCTGTC
25c_53	Mullus barbatus	frozen	2019-11-11	25	34.6536	33.2361	100	NOT AVAILABLE	222	157.45	F	2b	Library4	GACTA	AGTCA
25c_55	Mullus barbatus	frozen	2019-11-11	25	34.6536	33.2361	100	NOT AVAILABLE	205	101.18	F	2b	Library4	AGGACAC	TACGTGT
25c_57	Mullus barbatus	frozen	2019-11-11	25	34.6536	33.2361	100	NOT AVAILABLE	197	90.78	F	2b	Library4	TCAGA	GAGATGT
25c_60	Mullus barbatus	frozen	2019-11-11	25	34.6536	33.2361	100	NOT AVAILABLE	229	157.98	F	2b	Library4	TGCAACA	CGATC
25c_64	Mullus barbatus	frozen	2019-11-11	25	34.6536	33.2361	100	NOT AVAILABLE	183	81.04	F	2b	Library4	GATCG	CATCTGT
25c_65	Mullus barbatus	frozen	2019-11-11	25	34.6536	33.2361	100	NOT AVAILABLE	194	85.24	F	2b	Library4	CGTATCA	CTGGT
25c_72	Mullus barbatus	frozen	2019-11-11	25	34.6536	33.2361	100	NOT AVAILABLE	207	102.37	F	2b	Library4	CATGA	GTCAAGT
25c_76	Mullus barbatus	frozen	2019-11-11	25	34.6536	33.2361	100	NOT AVAILABLE	200	106.69	F	2b	Library4	CACAGAC	GAAGC
25c_77	Mullus barbatus	frozen	2019-11-11	25	34.6536	33.2361	100	NOT AVAILABLE	219	128.94	F	2b	Library4	ATCGA	ATACGGT
25c_78	Mullus barbatus	frozen	2019-11-11	25	34.6536	33.2361	100	NOT AVAILABLE	208	101.85	F	2b	Library4	ACTGCAC	TAGCA
25c_79	Mullus barbatus	frozen	2019-11-11	25	34.6536	33.2361	100	NOT AVAILABLE	203	93.27	F	2b	Library4	TCGAG	AGCTGTC
25c_81	Mullus barbatus	frozen	2019-11-11	25	34.6536	33.2361	100	NOT AVAILABLE	213	127.75	F	2b	Library4	TCTCTCA	AGTCA
25c_82	Mullus barbatus	frozen	2019-11-11	25	34.6536	33.2361	100	NOT AVAILABLE	201	94.7	F	2b	Library4	GTCAC	TACGTGT
25c_83	Mullus barbatus	frozen	2019-11-11	25	34.6536	33.2361	100	NOT AVAILABLE	192	77.55	F	2b	Library4	GTACACA	GCATA
25c_84	Mullus barbatus	frozen	2019-11-11	25	34.6536	33.2361	100	NOT AVAILABLE	205	102.51	F	2b	Library4	GCATT	GAGATGT
25c_91	Mullus barbatus	frozen	2019-11-25	25	34.6739	33.2475	100	NOT AVAILABLE	229	145.47	F	2b	Library4	CTCTTCA	CGATC
25c_92	Mullus barbatus	frozen	2019-11-25	25	34.6739	33.2475	100	NOT AVAILABLE	232	142.53	F	2b	Library4	CGATA	CATCTGT
25c_93	Mullus barbatus	frozen	2019-11-25	25	34.6739	33.2475	100	NOT AVAILABLE	226	138.43	F	2b	Library4	CTAGGAC	CTGGT
26b_02	Mullus barbatus	fresh	2019-09-16	26	32.7155	30.9947	50-100	NOT AVAILABLE	121	19.62	F	NOT AVAILABLE	Library4	ACGTA	GTCAAGT
26b_03	Mullus barbatus	fresh	2019-09-16	26	32.7155	30.9947	50-100	NOT AVAILABLE	120	19.88	F	NOT AVAILABLE	Library4	CAGTCAC	GAAGC
26b_04	Mullus barbatus	fresh	2019-09-16	26	32.7155	30.9947	50-100	NOT AVAILABLE	118	17.76	F	NOT AVAILABLE	Library4	AGAGT	ATACGGT
26b_05	Mullus barbatus	fresh	2019-09-16	26	32.7155	30.9947	50-100	NOT AVAILABLE	113	18.74	F	NOT AVAILABLE	Library4	GCTAACA	TAGCA
26b_06	Mullus barbatus	fresh	2019-09-16	26	32.7155	30.9947	50-100	NOT AVAILABLE	118	17.48	F	NOT AVAILABLE	Library4	ATGCT	AGCTGTC
26b_07	Mullus barbatus	fresh	2019-09-16	26	32.7155	30.9947	50-100	NOT AVAILABLE	112	18.53	F	NOT AVAILABLE	Library4	ACACGAG	AGTCA
26b_08	Mullus barbatus	fresh	2019-09-16	26	32.7155	30.9947	50-100	NOT AVAILABLE	126	21.32	F	NOT AVAILABLE	Library4	GACTA	TACGTGT
26b_09	Mullus barbatus	fresh	2019-09-16	26	32.7155	30.9947	50-100	NOT AVAILABLE	128	25.77	F	NOT AVAILABLE	Library4	AGGACAC	GCATA
26b_10	Mullus barbatus	fresh	2019-09-16	26	32.7155	30.9947	50-100	NOT AVAILABLE	116	18.03	F	NOT AVAILABLE	Library4	TCAGA	CGATC
26b_11	Mullus barbatus	fresh	2019-09-16	26	32.7155	30.9947	50-100	NOT AVAILABLE	127	21.27	F	NOT AVAILABLE	Library4	TGCAACA	CATCTGT
26b_12	Mullus barbatus	fresh	2019-09-16	26	32.7155	30.9947	50-100	NOT AVAILABLE	134	25.84	F	NOT AVAILABLE	Library4	GATCG	CTGGT
26b_13	Mullus barbatus	fresh	2019-09-16	26	32.7155	30.9947	50-100	NOT AVAILABLE	129	23.86	F	NOT AVAILABLE	Library4	CGTATCA	GTCAAGT
26b_15	Mullus barbatus	fresh	2019-09-16	26	32.7155	30.9947	50-100	NOT AVAILABLE	153	21.18	F	NOT AVAILABLE	Library4	CATGA	GAAGC
26b_16	Mullus barbatus	fresh	2019-09-16	26	32.7155	30.9947	50-100	NOT AVAILABLE	145	21.74	F	NOT AVAILABLE	Library4	CACAGAC	ATACGGT
26b_17	Mullus barbatus	fresh	2019-09-16	26	32.7155	30.9947	50-100	NOT AVAILABLE	133	23.74	F	NOT AVAILABLE	Library4	ATCGA	TAGCA
26b_18	Mullus barbatus	fresh	2019-09-16	26	32.7155	30.9947	50-100	NOT AVAILABLE	124	22.91	F	NOT AVAILABLE	Library4	ACTGCAC	AGCTGTC
26b_19	Mullus barbatus	fresh	2019-09-16	26	32.7155	30.9947	50-100	NOT AVAILABLE	136	26.48	F	NOT AVAILABLE	Library4	TCGAG	AGTCA
26b_20	Mullus barbatus	fresh	2019-09-16	26	32.7155	30.9947	50-100	NOT AVAILABLE	132	25.66	F	NOT AVAILABLE	Library4	TCTCTCA	TACGTGT
26b_21	Mullus barbatus	fresh	2019-09-16	26	32.7155	30.9947	50-100	NOT AVAILABLE	128	24.8	F	NOT AVAILABLE	Library4	GTCAC	GCATA
26b_22	Mullus barbatus	fresh	2019-09-16	26	32.7155	30.9947	50-100	NOT AVAILABLE	135	26.96	F	NOT AVAILABLE	Library4	GTACACA	GAGATGT
26b_23	Mullus barbatus	fresh	2019-09-16	26	32.7155	30.9947	50-100	NOT AVAILABLE	143	33.89	F	NOT AVAILABLE	Library4	GCATT	CGATC
26b_24	Mullus barbatus	fresh	2019-09-16	26	32.7155	30.9947	50-100	NOT AVAILABLE	142	31.96	F	NOT AVAILABLE	Library4	CTCTTCA	CATCTGT
26b_25	Mullus barbatus	fresh	2019-09-16	26	32.7155	30.9947	50-100	NOT AVAILABLE	136	26.95	F	NOT AVAILABLE	Library4	CGATA	CTGGT
26b_27	Mullus barbatus	fresh	2019-09-16	26	32.7155	30.9947	50-100	NOT AVAILABLE	134	25.2	F	NOT AVAILABLE	Library4	CTAGGAC	GTCAAGT
26b_28	Mullus barbatus	fresh	2019-09-16	26	32.7155	30.9947	50-100	NOT AVAILABLE	135	25.28	F	NOT AVAILABLE	Library4	ACGTA	GAAGC
26b_30	Mullus barbatus	fresh	2019-09-16	26	32.7155	30.9947	50-100	NOT AVAILABLE	145	32.01	F	NOT AVAILABLE	Library4	CAGTCAC	ATACGGT
26b_31	Mullus barbatus	fresh	2019-09-16	26	32.7155	30.9947	50-100	NOT AVAILABLE	151	22.58	M	NOT AVAILABLE	Library4	AGAGT	TAGCA
26b_32	Mullus barbatus	fresh	2019-09-16	26	32.7155	30.9947	50-100	NOT AVAILABLE	124	19.78	M	NOT AVAILABLE	Library4	GCTAACA	AGCTGTC
26b_33	Mullus barbatus	fresh	2019-09-16	26	32.7155	30.9947	50-100	NOT AVAILABLE	137	30.41	M	NOT AVAILABLE	Library4	ATGCT	AGTCA
26b_36	Mullus barbatus	fresh	2019-09-16	26	32.7155	30.9947	50-100	NOT AVAILABLE	132	22.28	M	NOT AVAILABLE	Library4	ACACGAG	TACGTGT
26b_37	Mullus barbatus	fresh	2019-09-16	26	32.7155	30.9947	50-100	NOT AVAILABLE	123	23.16	M	NOT AVAILABLE	Library4	GACTA	GCATA
26b_39	Mullus barbatus	fresh	2019-09-16	26	32.7155	30.9947	50-100	NOT AVAILABLE	129	22.08	M	NOT AVAILABLE	Library4	AGGACAC	GAGATGT
26b_40	Mullus barbatus	fresh	2019-09-16	26	32.7155	30.9947	50-100	NOT AVAILABLE	142	32.73	M	NOT AVAILABLE	Library4	TCAGA	CATCTGT
26b_41	Mullus barbatus	fresh	2019-09-16	26	32.7155	30.9947	50-100	NOT AVAILABLE	138	27.81	M	NOT AVAILABLE	Library4	TGCAACA	CTGGT
26b_42	Mullus barbatus	fresh	2019-09-16	26	32.7155	30.9947	50-100	NOT AVAILABLE	135	28.4	M	NOT AVAILABLE	Library4	GATCG	GTCAAGT
26b_43	Mullus barbatus	fresh	2019-09-16	26	32.7155	30.9947	50-100	NOT AVAILABLE	121	21.8	M	NOT AVAILABLE	Library4	CGTATCA	GAAGC
26b_44	Mullus barbatus	fresh	2019-09-16	26	32.7155	30.9947	50-100	NOT AVAILABLE	141	29.8	M	NOT AVAILABLE	Library4	CATGA	ATACGGT
26b_45	Mullus barbatus	fresh	2019-09-16	26	32.7155	30.9947	50-100	NOT AVAILABLE	127	25.01	M	NOT AVAILABLE	Library4	CACAGAC	TAGCA
26b_46	Mullus barbatus	fresh	2019-09-16	26	32.7155	30.9947	50-100	NOT AVAILABLE	141	31.47	M	NOT AVAILABLE	Library4	ATCGA	AGCTGTC
26b_47	Mullus barbatus	fresh	2019-09-16	26	32.7155	30.9947	50-100	NOT AVAILABLE	122	20.23	M	NOT AVAILABLE	Library4	ACTGCAC	AGTCA
26b_49	Mullus barbatus	fresh	2019-09-16	26	32.7155	30.9947	50-100	NOT AVAILABLE	127	20.85	M	NOT AVAILABLE	Library4	TCGAG	TACGTGT
26c_01	Mullus barbatus	fresh	2019-10-02	26	32.5744	33.1659	50-100	NOT AVAILABLE	179	66.88	F	NOT AVAILABLE	Library4	TCAGA	CTGGT
26c_02	Mullus barbatus	fresh	2019-10-02	26	32.5744	33.1659	50-100	NOT AVAILABLE	161	63.24	M	NOT AVAILABLE	Library4	TGCAACA	GTCAAGT
26c_03	Mullus barbatus	fresh	2019-10-02	26	32.5744	33.1659	50-100	NOT AVAILABLE	171	61.87	M	NOT AVAILABLE	Library4	GATCG	GAAGC
26c_04	Mullus barbatus	fresh	2019-10-02	26	32.5744	33.1659	50-100	NOT AVAILABLE	175	68.13	M	NOT AVAILABLE	Library4	CGTATCA	ATACGGT
26c_05	Mullus barbatus	fresh	2019-10-02	26	32.5744	33.1659	50-100	NOT AVAILABLE	175	62.38	F	NOT AVAILABLE	Library4	CATGA	TAGCA
26c_06	Mullus barbatus	fresh	2019-10-02	26	32.5744	33.1659	50-100	NOT AVAILABLE	170	59.19	F	NOT AVAILABLE	Library4	CACAGAC	AGCTGTC
26c_07	Mullus barbatus	fresh	2019-10-02	26	32.5744	33.1659	50-100	NOT AVAILABLE	154	46.33	M	NOT AVAILABLE	Library4	ATCGA	AGTCA
26c_08	Mullus barbatus	fresh	2019-10-02	26	32.5744	33.1659	50-100	NOT AVAILABLE	163	50.87	F	NOT AVAILABLE	Library4	ACTGCAC	TACGTGT
26c_09	Mullus barbatus	fresh	2019-10-02	26	32.5744	33.1659	50-100	NOT AVAILABLE	158	52.77	M	NOT AVAILABLE	Library4	TCGAG	GCATA
26c_12	Mullus barbatus	fresh	2019-10-02	26	32.5744	33.1659	50-100	NOT AVAILABLE	161	50.84	M	NOT AVAILABLE	Library4	TCTCTCA	GAGATGT
26c_13	Mullus barbatus	fresh	2019-10-02	26	32.5744	33.1659	50-100	NOT AVAILABLE	150	45.88	M	NOT AVAILABLE	Library4	GTCAC	CGATC
26c_14	Mullus barbatus	fresh	2019-10-02	26	32.5744	33.1659	50-100	NOT AVAILABLE	166	54.51	M	NOT AVAILABLE	Library4	GTACACA	CATCTGT
26c_15	Mullus barbatus	fresh	2019-10-02	26	32.5744	33.1659	50-100	NOT AVAILABLE	154	41.16	M	NOT AVAILABLE	Library4	GCATT	CTGGT
26c_16	Mullus barbatus	fresh	2019-10-02	26	32.5744	33.1659	50-100	NOT AVAILABLE	151	38.51	F	NOT AVAILABLE	Library4	CTCTTCA	GTCAAGT
26c_17	Mullus barbatus	fresh	2019-10-02	26	32.5744	33.1659	50-100	NOT AVAILABLE	151	42.63	M	NOT AVAILABLE	Library4	CGATA	GAAGC
26c_18	Mullus barbatus	fresh	2019-10-02	26	32.5744	33.1659	50-100	NOT AVAILABLE	152	40.08	M	NOT AVAILABLE	Library4	CTAGGAC	ATACGGT
26c_19	Mullus barbatus	fresh	2019-10-02	26	32.5744	33.1659	50-100	NOT AVAILABLE	147	38.01	M	NOT AVAILABLE	Library4	ACGTA	TAGCA
26c_20	Mullus barbatus	fresh	2019-10-02	26	32.5744	33.1659	50-100	NOT AVAILABLE	156	43	M	NOT AVAILABLE	Library4	CAGTCAC	AGCTGTC
26c_22	Mullus barbatus	fresh	2019-10-02	26	32.5744	33.1659	50-100	NOT AVAILABLE	151	40.4	F	NOT AVAILABLE	Library4	AGAGT	AGTCA
26c_23	Mullus barbatus	fresh	2019-10-02	26	32.5744	33.1659	50-100	NOT AVAILABLE	148	36.38	F	NOT AVAILABLE	Library4	GCTAACA	TACGTGT
26c_24	Mullus barbatus	fresh	2019-10-02	26	32.5744	33.1659	50-100	NOT AVAILABLE	147	34.76	F	NOT AVAILABLE	Library4	ATGCT	GCATA
26c_25	Mullus barbatus	fresh	2019-10-02	26	32.5744	33.1659	50-100	NOT AVAILABLE	146	37.73	M	NOT AVAILABLE	Library4	ACACGAG	GAGATGT
26c_26	Mullus barbatus	fresh	2019-10-02	26	32.5744	33.1659	50-100	NOT AVAILABLE	152	42.78	M	NOT AVAILABLE	Library4	GACTA	CGATC
26c_27	Mullus barbatus	fresh	2019-10-02	26	32.5744	33.1659	50-100	NOT AVAILABLE	148	39.26	F	NOT AVAILABLE	Library4	AGGACAC	CATCTGT
26c_28	Mullus barbatus	fresh	2019-10-02	26	32.5744	33.1659	50-100	NOT AVAILABLE	143	37.62	M	NOT AVAILABLE	Library4	TCAGA	GTCAAGT
26c_29	Mullus barbatus	fresh	2019-10-02	26	32.5744	33.1659	50-100	NOT AVAILABLE	140	33.17	F	NOT AVAILABLE	Library4	TGCAACA	GAAGC
26c_36	Mullus barbatus	fresh	2019-10-02	26	32.5744	33.1659	50-100	NOT AVAILABLE	142	35.22	M	NOT AVAILABLE	Library4	GATCG	ATACGGT
26c_37	Mullus barbatus	fresh	2019-10-02	26	32.5744	33.1659	50-100	NOT AVAILABLE	143	32.78	F	NOT AVAILABLE	Library4	CGTATCA	TAGCA
26c_38	Mullus barbatus	fresh	2019-10-02	26	32.5744	33.1659	50-100	NOT AVAILABLE	140	34.17	F	NOT AVAILABLE	Library4	CATGA	AGCTGTC
26c_39	Mullus barbatus	fresh	2019-10-02	26	32.5744	33.1659	50-100	NOT AVAILABLE	140	36.59	M	NOT AVAILABLE	Library4	CACAGAC	AGTCA
26c_40	Mullus barbatus	fresh	2019-10-02	26	32.5744	33.1659	50-100	NOT AVAILABLE	135	28.15	M	NOT AVAILABLE	Library4	ATCGA	TACGTGT
26c_41	Mullus barbatus	fresh	2019-10-02	26	32.5744	33.1659	50-100	NOT AVAILABLE	129	25.01	M	NOT AVAILABLE	Library4	ACTGCAC	GCATA
26c_42	Mullus barbatus	fresh	2019-10-02	26	32.5744	33.1659	50-100	NOT AVAILABLE	132	22.36	F	NOT AVAILABLE	Library4	TCGAG	GAGATGT
26c_43	Mullus barbatus	fresh	2019-10-02	26	32.5744	33.1659	50-100	NOT AVAILABLE	122	22.95	M	NOT AVAILABLE	Library4	TCTCTCA	CGATC
26c_44	Mullus barbatus	fresh	2019-10-02	26	32.5744	33.1659	50-100	NOT AVAILABLE	136	30.1	M	NOT AVAILABLE	Library4	GTCAC	CATCTGT
26c_45	Mullus barbatus	fresh	2019-10-02	26	32.5744	33.1659	50-100	NOT AVAILABLE	126	24.6	F	NOT AVAILABLE	Library4	GTACACA	CTGGT
26c_47	Mullus barbatus	fresh	2019-10-02	26	32.5744	33.1659	50-100	NOT AVAILABLE	144	34.73	M	NOT AVAILABLE	Library4	GCATT	GTCAAGT
26c_48	Mullus barbatus	fresh	2019-10-02	26	32.5744	33.1659	50-100	NOT AVAILABLE	125	23.44	F	NOT AVAILABLE	Library4	CTCTTCA	GAAGC
26c_49	Mullus barbatus	fresh	2019-10-02	26	32.5744	33.1659	50-100	NOT AVAILABLE	133	24.51	M	NOT AVAILABLE	Library4	CGATA	ATACGGT
26c_50	Mullus barbatus	fresh	2019-10-02	26	32.5744	33.1659	50-100	NOT AVAILABLE	133	28.42	F	NOT AVAILABLE	Library4	CTAGGAC	TAGCA
27a_01	Mullus barbatus	fresh	2019-07-29	27	31.5727	34.1622	130	NOT AVAILABLE	238	165	F	4	Library2	AGGACAC	GCATA
27a_02	Mullus barbatus	fresh	2019-07-29	27	31.5727	34.1622	130	NOT AVAILABLE	243	171.3	F	2	Library2	TCAGA	CGATC
27a_03	Mullus barbatus	fresh	2019-07-29	27	31.5727	34.1622	130	NOT AVAILABLE	227	115.3	F	4	Library2	TGCAACA	CATCTGT
27a_04	Mullus barbatus	fresh	2019-07-29	27	31.5727	34.1622	130	NOT AVAILABLE	205	92.5	F	2	Library2	GATCG	CTGGT
27a_05	Mullus barbatus	fresh	2019-07-29	27	31.5727	34.1622	130	NOT AVAILABLE	233	152	M	2	Library2	CGTATCA	GTCAAGT
27a_06	Mullus barbatus	fresh	2019-07-29	27	31.5727	34.1622	130	NOT AVAILABLE	238	142.2	F	4	Library2	CATGA	GAAGC
27a_07	Mullus barbatus	fresh	2019-07-29	27	31.5727	34.1622	130	NOT AVAILABLE	223	110	F	4	Library2	CACAGAC	ATACGGT
27a_08	Mullus barbatus	fresh	2019-07-29	27	31.5727	34.1622	130	NOT AVAILABLE	189	73.3	M	2	Library2	ATCGA	TAGCA
27a_09	Mullus barbatus	fresh	2019-07-29	27	31.5727	34.1622	130	NOT AVAILABLE	238	171.7	F	5	Library2	ACTGCAC	AGCTGTC
27a_10	Mullus barbatus	fresh	2019-07-29	27	31.5727	34.1622	130	NOT AVAILABLE	194	78.8	M	3	Library2	TCGAG	AGTCA
27a_11	Mullus barbatus	fresh	2019-07-29	27	31.5727	34.1622	130	NOT AVAILABLE	185	68.8	M	2	Library2	TCTCTCA	TACGTGT
27a_12	Mullus barbatus	fresh	2019-07-29	27	31.5727	34.1622	130	NOT AVAILABLE	200	84.7	F	2	Library2	GTCAC	GCATA
27a_13	Mullus barbatus	fresh	2019-07-29	27	31.5727	34.1622	130	NOT AVAILABLE	185	71	M	2	Library2	GTACACA	GAGATGT
27a_15	Mullus barbatus	fresh	2019-07-29	27	31.5727	34.1622	130	NOT AVAILABLE	187	61.9	F	2	Library2	GCATT	CGATC
27a_16	Mullus barbatus	fresh	2019-07-29	27	31.5727	34.1622	130	NOT AVAILABLE	168	54.2	F	2	Library2	CTCTTCA	CATCTGT
27a_17	Mullus barbatus	fresh	2019-07-30	27	31.5517	34.1517	126	NOT AVAILABLE	230	151.2	F	4	Library2	CGATA	CTGGT
27a_18	Mullus barbatus	fresh	2019-07-30	27	31.5517	34.1517	126	NOT AVAILABLE	188	71.9	F	3	Library2	CTAGGAC	GTCAAGT
27a_19	Mullus barbatus	fresh	2019-07-30	27	31.5517	34.1517	126	NOT AVAILABLE	227	129	F	4	Library2	ACGTA	GAAGC
27a_20	Mullus barbatus	fresh	2019-07-30	27	31.5517	34.1517	126	NOT AVAILABLE	234	141.8	F	3	Library2	CAGTCAC	ATACGGT
27a_21	Mullus barbatus	fresh	2019-07-30	27	31.5517	34.1517	126	NOT AVAILABLE	200	89.7	F	3	Library2	AGAGT	TAGCA
27a_22	Mullus barbatus	fresh	2019-07-30	27	31.5517	34.1517	126	NOT AVAILABLE	220	132.1	F	3	Library2	GCTAACA	AGCTGTC
27a_23	Mullus barbatus	fresh	2019-07-30	27	31.5517	34.1517	126	NOT AVAILABLE	223	126	F	4	Library2	ATGCT	AGTCA
27a_24	Mullus barbatus	fresh	2019-07-31	27	31.5407	34.1172	160	NOT AVAILABLE	230	131.7	F	3	Library2	ACACGAG	TACGTGT
27a_25	Mullus barbatus	fresh	2019-07-31	27	31.5407	34.1172	160	NOT AVAILABLE	235	141.3	F	3	Library2	GACTA	GCATA
27a_26	Mullus barbatus	fresh	2019-07-31	27	31.5407	34.1172	160	NOT AVAILABLE	258	200.9	F	4	Library2	AGGACAC	GAGATGT
27a_27	Mullus barbatus	fresh	2019-07-31	27	31.5407	34.1172	160	NOT AVAILABLE	248	186.8	F	4	Library2	TCAGA	CATCTGT
27a_28	Mullus barbatus	fresh	2019-07-31	27	31.5407	34.1172	160	NOT AVAILABLE	225	126.4	F	3	Library2	TGCAACA	CTGGT
27a_29	Mullus barbatus	fresh	2019-07-31	27	31.5407	34.1172	160	NOT AVAILABLE	240	153.5	F	3	Library2	GATCG	GTCAAGT
27a_30	Mullus barbatus	fresh	2019-07-31	27	31.5407	34.1172	160	NOT AVAILABLE	242	146	F	5	Library2	CGTATCA	GAAGC
27a_31	Mullus barbatus	fresh	2019-07-31	27	31.5407	34.1172	160	NOT AVAILABLE	248	193.1	F	3	Library2	CATGA	ATACGGT
27a_32	Mullus barbatus	fresh	2019-07-31	27	31.5407	34.1172	160	NOT AVAILABLE	215	113.6	F	3	Library2	CACAGAC	TAGCA
27a_33	Mullus barbatus	fresh	2019-07-31	27	31.5407	34.1172	160	NOT AVAILABLE	243	138.3	F	3	Library2	ATCGA	AGCTGTC
27a_34	Mullus barbatus	fresh	2019-07-31	27	31.5407	34.1172	160	NOT AVAILABLE	234	151.6	F	5	Library2	ACTGCAC	AGTCA
27a_35	Mullus barbatus	fresh	2019-07-31	27	31.5407	34.1172	160	NOT AVAILABLE	205	96	F	2	Library2	TCGAG	TACGTGT
27a_36	Mullus barbatus	fresh	2019-07-31	27	31.5407	34.1172	160	NOT AVAILABLE	185	71.9	M	3	Library2	TCTCTCA	GCATA
27a_37	Mullus barbatus	fresh	2019-08-04	27	31.6036	34.1886	180	NOT AVAILABLE	244	142.6	F	2	Library2	GTCAC	GAGATGT
27a_38	Mullus barbatus	fresh	2019-08-04	27	31.6036	34.1886	180	NOT AVAILABLE	223	114.4	F	5	Library2	GTACACA	CGATC
27a_39	Mullus barbatus	fresh	2019-08-04	27	31.6036	34.1886	180	NOT AVAILABLE	217	116.4	F	2	Library2	GCATT	CATCTGT
27a_40	Mullus barbatus	fresh	2019-08-04	27	31.6036	34.1886	180	NOT AVAILABLE	235	114.9	F	3	Library2	CTCTTCA	CTGGT
27a_41	Mullus barbatus	fresh	2019-08-04	27	31.6036	34.1886	180	NOT AVAILABLE	235	156.8	F	5	Library2	CGATA	GTCAAGT
27a_42	Mullus barbatus	fresh	2019-08-04	27	31.6036	34.1886	180	NOT AVAILABLE	205	94.4	F	2	Library2	CTAGGAC	GAAGC
27a_43	Mullus barbatus	fresh	2019-08-04	27	31.6036	34.1886	180	NOT AVAILABLE	225	145.9	F	5	Library2	ACGTA	ATACGGT
27a_44	Mullus barbatus	fresh	2019-08-04	27	31.6036	34.1886	180	NOT AVAILABLE	250	170.7	F	5	Library2	CAGTCAC	TAGCA
27a_45	Mullus barbatus	fresh	2019-08-04	27	31.6036	34.1886	180	NOT AVAILABLE	223	143.9	F	2	Library2	AGAGT	AGCTGTC
27a_46	Mullus barbatus	fresh	2019-08-04	27	31.6036	34.1886	180	NOT AVAILABLE	208	103.4	F	3	Library2	GCTAACA	AGTCA
27a_47	Mullus barbatus	fresh	2019-08-04	27	31.6036	34.1886	180	NOT AVAILABLE	240	163.3	F	3	Library2	ATGCT	TACGTGT
27a_48	Mullus barbatus	fresh	2019-08-04	27	31.6036	34.1886	180	NOT AVAILABLE	228	130	F	4	Library2	ACACGAG	GCATA
27a_49	Mullus barbatus	fresh	2019-08-04	27	31.6036	34.1886	180	NOT AVAILABLE	235	172.7	F	3	Library2	GACTA	GAGATGT
27a_50	Mullus barbatus	fresh	2019-08-04	27	31.6036	34.1886	180	NOT AVAILABLE	230	141.7	F	2	Library2	AGGACAC	CGATC
27b_01	Mullus barbatus	NOT AVAILABLE	NOT AVAILABLE	27	33.9208	35.0773	NOT AVAILABLE	NOT AVAILABLE	157	49	F	3	Library4	TCTCTCA	GCATA
27b_04	Mullus barbatus	NOT AVAILABLE	NOT AVAILABLE	27	33.9208	35.0773	NOT AVAILABLE	NOT AVAILABLE	160	47.8	M	2	Library4	GTCAC	GAGATGT
27b_06	Mullus barbatus	NOT AVAILABLE	NOT AVAILABLE	27	33.9208	35.0773	NOT AVAILABLE	NOT AVAILABLE	166	55.2	F	2	Library4	GTACACA	CGATC
27b_10	Mullus barbatus	NOT AVAILABLE	NOT AVAILABLE	27	33.9208	35.0773	NOT AVAILABLE	NOT AVAILABLE	145	34.3	I	0	Library4	GCATT	CATCTGT
27b_11	Mullus barbatus	NOT AVAILABLE	NOT AVAILABLE	27	33.9208	35.0773	NOT AVAILABLE	NOT AVAILABLE	154	43.2	F	2	Library4	CTCTTCA	CTGGT
27b_14	Mullus barbatus	NOT AVAILABLE	NOT AVAILABLE	27	33.9208	35.0773	NOT AVAILABLE	NOT AVAILABLE	142	30.5	M	2	Library4	CGATA	GTCAAGT
27b_15	Mullus barbatus	NOT AVAILABLE	NOT AVAILABLE	27	33.9208	35.0773	NOT AVAILABLE	NOT AVAILABLE	151	47.8	M	3	Library4	CTAGGAC	GAAGC
27b_16	Mullus barbatus	NOT AVAILABLE	NOT AVAILABLE	27	33.9208	35.0773	NOT AVAILABLE	NOT AVAILABLE	147	40.1	F	3	Library4	ACGTA	ATACGGT
27b_18	Mullus barbatus	NOT AVAILABLE	NOT AVAILABLE	27	33.9208	35.0773	NOT AVAILABLE	NOT AVAILABLE	154	42.1	F	2	Library4	CAGTCAC	TAGCA
27b_19	Mullus barbatus	NOT AVAILABLE	NOT AVAILABLE	27	33.9208	35.0773	NOT AVAILABLE	NOT AVAILABLE	150	37.7	F	2	Library4	AGAGT	AGCTGTC
27b_20	Mullus barbatus	NOT AVAILABLE	NOT AVAILABLE	27	33.9208	35.0773	NOT AVAILABLE	NOT AVAILABLE	152	40.2	F	2	Library4	GCTAACA	AGTCA
27b_21	Mullus barbatus	NOT AVAILABLE	NOT AVAILABLE	27	33.9208	35.0773	NOT AVAILABLE	NOT AVAILABLE	152	42.2	F	2	Library4	ATGCT	TACGTGT
27b_22	Mullus barbatus	NOT AVAILABLE	NOT AVAILABLE	27	33.9208	35.0773	NOT AVAILABLE	NOT AVAILABLE	142	35.9	I	0	Library4	ACACGAG	GCATA
27b_24	Mullus barbatus	NOT AVAILABLE	NOT AVAILABLE	27	33.9208	35.0773	NOT AVAILABLE	NOT AVAILABLE	151	37.3	M	2	Library4	GACTA	GAGATGT
27b_35	Mullus barbatus	NOT AVAILABLE	NOT AVAILABLE	27	33.9208	35.0773	NOT AVAILABLE	NOT AVAILABLE	174	64.3	F	3	Library4	AGGACAC	CGATC
27b_37	Mullus barbatus	NOT AVAILABLE	NOT AVAILABLE	27	33.9208	35.0773	NOT AVAILABLE	NOT AVAILABLE	150	38	F	2	Library4	CTCTTCA	GCATA
27b_38	Mullus barbatus	NOT AVAILABLE	NOT AVAILABLE	27	33.9208	35.0773	NOT AVAILABLE	NOT AVAILABLE	173	56	F	3	Library4	CGATA	GAGATGT
27b_40	Mullus barbatus	NOT AVAILABLE	NOT AVAILABLE	27	33.9208	35.0773	NOT AVAILABLE	NOT AVAILABLE	165	53.3	F	2	Library4	CTAGGAC	CGATC
27b_42	Mullus barbatus	NOT AVAILABLE	NOT AVAILABLE	27	33.9208	35.0773	NOT AVAILABLE	NOT AVAILABLE	160	43.5	I	0	Library4	ACGTA	CATCTGT
27b_43	Mullus barbatus	NOT AVAILABLE	NOT AVAILABLE	27	33.9208	35.0773	NOT AVAILABLE	NOT AVAILABLE	171	57.5	F	2	Library4	CAGTCAC	CTGGT
27b_48	Mullus barbatus	NOT AVAILABLE	NOT AVAILABLE	27	33.9208	35.0773	NOT AVAILABLE	NOT AVAILABLE	150	42.8	F	3	Library4	AGAGT	GTCAAGT
27b_49	Mullus barbatus	NOT AVAILABLE	NOT AVAILABLE	27	33.9208	35.0773	NOT AVAILABLE	NOT AVAILABLE	158	47	F	2	Library4	GCTAACA	GAAGC
